# Supplementary material for: In-host population dynamics of M. tuberculosis during treatment failure
Source: bioRxiv preprint, doi:10.1101/726430, version 2 (2020-04-23)
Supplement: Table S12 [file 726430_file15.xlsx]

## Sheet: epitopes_with_SNPs
Peptide	H37Rv Homolog	Rv position #	Start Peptide Genomic Coord	End Peptide Genomic Coord	in-host SNPs within epitope
LIATNLLGQNTPAIAVNEAE	Rv1196	121-140	360	420	1
TPAIAVNEAEYGEMWAQDAA	Rv1196	131-150	390	450	1
LIATNLLGQNTPAIA	Rv1196	121-135	360	405	1
LLGQNTPAIAVNEAE	Rv1196	126-140	375	420	1
TPAIAVNEAEYGEMW	Rv1196	131-145	390	435	1
