# Supplementary material for: In-host population dynamics of M. tuberculosis during treatment failure
Source: bioRxiv preprint, doi:10.1101/726430, version 2 (2020-04-23)
Supplement: Table S18 [file 726430_file21.xlsx]

## Sheet: SNPs_from_rollingDB
Isolate ID	Reference Position	Reference Allele	Alternate Allele	H37Rv Locus Tag	Genomic Coordinate	Gene Category	Symbol	SNP Type	AA Change	Global Lineage
SAMEA1404001	6742	A	C	Rv0005	1503	Antibiotic Resistance	gyrB	N	E501D	2
SAMN10961345	6742	A	C	Rv0005	1503	Antibiotic Resistance	gyrB	N	E501D	2
SAMEA5626316	6742	A	C	Rv0005	1503	Antibiotic Resistance	gyrB	N	E501D	3
SAMN08708189	6742	A	C	Rv0005	1503	Antibiotic Resistance	gyrB	N	E501D	2
SAMN08708356	6742	A	C	Rv0005	1503	Antibiotic Resistance	gyrB	N	E501D	2
SAMEA3443175	6742	A	C	Rv0005	1503	Antibiotic Resistance	gyrB	N	E501D	3
SAMN07236289	6742	A	C	Rv0005	1503	Antibiotic Resistance	gyrB	N	E501D	2
SAMN02360557	6742	A	C	Rv0005	1503	Antibiotic Resistance	gyrB	N	E501D	2
SAMEA1403669	6742	A	C	Rv0005	1503	Antibiotic Resistance	gyrB	N	E501D	2
SAMN08214977	6742	A	C	Rv0005	1503	Antibiotic Resistance	gyrB	N	E501D	2
SAMN02360555	6742	A	C	Rv0005	1503	Antibiotic Resistance	gyrB	N	E501D	2
SAMEA3305001	6742	A	C	Rv0005	1503	Antibiotic Resistance	gyrB	N	E501D	2
SAMN07236290	6742	A	C	Rv0005	1503	Antibiotic Resistance	gyrB	N	E501D	2
SAMEA104221065	6742	A	C	Rv0005	1503	Antibiotic Resistance	gyrB	N	E501D	4
Peru4016	6742	A	C	Rv0005	1503	Antibiotic Resistance	gyrB	N	E501D	4
SAMN06209869	6742	A	C	Rv0005	1503	Antibiotic Resistance	gyrB	N	E501D	2
SAMN06209871	6742	A	C	Rv0005	1503	Antibiotic Resistance	gyrB	N	E501D	2
SAMEA104221064	6742	A	C	Rv0005	1503	Antibiotic Resistance	gyrB	N	E501D	4
SAMEA3374100	6742	A	C	Rv0005	1503	Antibiotic Resistance	gyrB	N	E501D	2
SAMEA1707278	6742	A	C	Rv0005	1503	Antibiotic Resistance	gyrB	N	E501D	2
Peru3289	6742	A	C	Rv0005	1503	Antibiotic Resistance	gyrB	N	E501D	4
SAMEA1404014	7521	G	T	Rv0006	220	Antibiotic Resistance	gyrA	N	A74S	2
SAMEA1019039	7521	G	T	Rv0006	220	Antibiotic Resistance	gyrA	N	A74S	4
SAMEA1403784	7521	G	T	Rv0006	220	Antibiotic Resistance	gyrA	N	A74S	2
SAMN06210004	7581	G	A	Rv0006	280	Antibiotic Resistance	gyrA	N	D94N	2
SAMEA5626247	7581	G	A	Rv0006	280	Antibiotic Resistance	gyrA	N	D94N	3
SAMEA1101674	7581	G	A	Rv0006	280	Antibiotic Resistance	gyrA	N	D94N	3
SAMEA5569904	7581	G	A	Rv0006	280	Antibiotic Resistance	gyrA	N	D94N	4
SAMN13051661	7581	G	A	Rv0006	280	Antibiotic Resistance	gyrA	N	D94N	2
SAMN08708189	7581	G	A	Rv0006	280	Antibiotic Resistance	gyrA	N	D94N	2
SAMEA4744345	7581	G	A	Rv0006	280	Antibiotic Resistance	gyrA	N	D94N	4
SAMN08708233	7581	G	A	Rv0006	280	Antibiotic Resistance	gyrA	N	D94N	2
SAMN07236308	7581	G	A	Rv0006	280	Antibiotic Resistance	gyrA	N	D94N	2
SAMN08626351	7581	G	A	Rv0006	280	Antibiotic Resistance	gyrA	N	D94N	2
SAMEA4079236	7581	G	A	Rv0006	280	Antibiotic Resistance	gyrA	N	D94N	2
SAMN07956488	7581	G	A	Rv0006	280	Antibiotic Resistance	gyrA	N	D94N	2
SAMEA1016073	7581	G	A	Rv0006	280	Antibiotic Resistance	gyrA	N	D94N	2
SAMEA3558558	7581	G	A	Rv0006	280	Antibiotic Resistance	gyrA	N	D94N	2
SAMEA3262975	7581	G	A	Rv0006	280	Antibiotic Resistance	gyrA	N	D94N	2
SAMEA95485168	7581	G	A	Rv0006	280	Antibiotic Resistance	gyrA	N	D94N	2
SAMEA4079242	7581	G	A	Rv0006	280	Antibiotic Resistance	gyrA	N	D94N	2
SAMEA3443191	7581	G	A	Rv0006	280	Antibiotic Resistance	gyrA	N	D94N	2
SAMEA1102554	7581	G	A	Rv0006	280	Antibiotic Resistance	gyrA	N	D94N	2
SAMN07236279	7581	G	A	Rv0006	280	Antibiotic Resistance	gyrA	N	D94N	2
SAMN02403457	7581	G	A	Rv0006	280	Antibiotic Resistance	gyrA	N	D94N	2
SAMN07236280	7581	G	A	Rv0006	280	Antibiotic Resistance	gyrA	N	D94N	2
IDR1600005829	7581	G	A	Rv0006	280	Antibiotic Resistance	gyrA	N	D94N	1
SAMEA1469493	7581	G	A	Rv0006	280	Antibiotic Resistance	gyrA	N	D94N	2
Peru3434	7581	G	A	Rv0006	280	Antibiotic Resistance	gyrA	N	D94N	2
SAMEA1707125	7581	G	A	Rv0006	280	Antibiotic Resistance	gyrA	N	D94N	2
SAMEA3377915	7581	G	A	Rv0006	280	Antibiotic Resistance	gyrA	N	D94N	2
SAMEA95493418	7581	G	A	Rv0006	280	Antibiotic Resistance	gyrA	N	D94N	2
SAMEA5570040	7581	G	A	Rv0006	280	Antibiotic Resistance	gyrA	N	D94N	4
SAMEA4079241	7581	G	A	Rv0006	280	Antibiotic Resistance	gyrA	N	D94N	2
SAMD00117888	7581	G	A	Rv0006	280	Antibiotic Resistance	gyrA	N	D94N	2
SAMEA4079237	7581	G	A	Rv0006	280	Antibiotic Resistance	gyrA	N	D94N	2
SAMEA1016120	7581	G	A	Rv0006	280	Antibiotic Resistance	gyrA	N	D94N	2
SAMN02419643	7581	G	A	Rv0006	280	Antibiotic Resistance	gyrA	N	D94N	2
SAMEA4079235	7581	G	A	Rv0006	280	Antibiotic Resistance	gyrA	N	D94N	2
SAMEA4744476	7581	G	A	Rv0006	280	Antibiotic Resistance	gyrA	N	D94N	4
SAMEA3558606	7581	G	A	Rv0006	280	Antibiotic Resistance	gyrA	N	D94N	2
SAMEA4744245	7581	G	A	Rv0006	280	Antibiotic Resistance	gyrA	N	D94N	4
SAMN09756056	7581	G	A	Rv0006	280	Antibiotic Resistance	gyrA	N	D94N	2
SAMN07236326	7581	G	A	Rv0006	280	Antibiotic Resistance	gyrA	N	D94N	2
SAMEA4370630	7581	G	A	Rv0006	280	Antibiotic Resistance	gyrA	N	D94N	2
SAMN04396853	7581	G	A	Rv0006	280	Antibiotic Resistance	gyrA	N	D94N	3
SAMN04633325	7581	G	A	Rv0006	280	Antibiotic Resistance	gyrA	N	D94N	2
SAMN07236305	7581	G	A	Rv0006	280	Antibiotic Resistance	gyrA	N	D94N	2
SAMD00117811	7581	G	A	Rv0006	280	Antibiotic Resistance	gyrA	N	D94N	2
SAMEA3558574	7581	G	A	Rv0006	280	Antibiotic Resistance	gyrA	N	D94N	2
SAMN10961335	7581	G	A	Rv0006	280	Antibiotic Resistance	gyrA	N	D94N	2
SAMN07236528	7581	G	A	Rv0006	280	Antibiotic Resistance	gyrA	N	D94N	2
SAMN06578951	7581	G	A	Rv0006	280	Antibiotic Resistance	gyrA	N	D94N	2
SAMN08214960	7581	G	A	Rv0006	280	Antibiotic Resistance	gyrA	N	D94N	2
SAMN08215266	7581	G	A	Rv0006	280	Antibiotic Resistance	gyrA	N	D94N	2
SAMN06579117	7581	G	A	Rv0006	280	Antibiotic Resistance	gyrA	N	D94N	3
SAMN09651596	7581	G	A	Rv0006	280	Antibiotic Resistance	gyrA	N	D94N	4
SAMN08708598	7581	G	A	Rv0006	280	Antibiotic Resistance	gyrA	N	D94N	2
SAMEA3558860	7581	G	A	Rv0006	280	Antibiotic Resistance	gyrA	N	D94N	4
SAMEA2296953	7581	G	A	Rv0006	280	Antibiotic Resistance	gyrA	N	D94N	2
SAMEA3273054	7581	G	A	Rv0006	280	Antibiotic Resistance	gyrA	N	D94N	2
SAMN13169501	7581	G	A	Rv0006	280	Antibiotic Resistance	gyrA	N	D94N	4
SAMN08626352	7581	G	A	Rv0006	280	Antibiotic Resistance	gyrA	N	D94N	2
SAMEA3432811	7581	G	A	Rv0006	280	Antibiotic Resistance	gyrA	N	D94N	2
SAMEA3558142	7581	G	A	Rv0006	280	Antibiotic Resistance	gyrA	N	D94N	4
SAMD00117784	7581	G	A	Rv0006	280	Antibiotic Resistance	gyrA	N	D94N	2
SAMN06579136	7581	G	A	Rv0006	280	Antibiotic Resistance	gyrA	N	D94N	2
SAMN07341196	7581	G	A	Rv0006	280	Antibiotic Resistance	gyrA	N	D94N	2
SAMN08214913	7581	G	A	Rv0006	280	Antibiotic Resistance	gyrA	N	D94N	2
SAMEA2709881	7581	G	A	Rv0006	280	Antibiotic Resistance	gyrA	N	D94N	4
SAMN02358678	7581	G	A	Rv0006	280	Antibiotic Resistance	gyrA	N	D94N	2
SAMEA95492668	7581	G	A	Rv0006	280	Antibiotic Resistance	gyrA	N	D94N	2
SAMEA95422918	7581	G	A	Rv0006	280	Antibiotic Resistance	gyrA	N	D94N	2
SAMN07341195	7581	G	A	Rv0006	280	Antibiotic Resistance	gyrA	N	D94N	2
SAMEA5626292	7581	G	A	Rv0006	280	Antibiotic Resistance	gyrA	N	D94N	4
SAMN13169697	7581	G	A	Rv0006	280	Antibiotic Resistance	gyrA	N	D94N	2
SAMN04633296	7581	G	A	Rv0006	280	Antibiotic Resistance	gyrA	N	D94N	2
SAMN07956621	7581	G	A	Rv0006	280	Antibiotic Resistance	gyrA	N	D94N	2
SAMN01908837	7581	G	A	Rv0006	280	Antibiotic Resistance	gyrA	N	D94N	2
SAMEA4079243	7581	G	A	Rv0006	280	Antibiotic Resistance	gyrA	N	D94N	2
SAMN08708821	7581	G	A	Rv0006	280	Antibiotic Resistance	gyrA	N	D94N	2
SAMEA3359383	7581	G	A	Rv0006	280	Antibiotic Resistance	gyrA	N	D94N	2
SAMN02403459	7581	G	A	Rv0006	280	Antibiotic Resistance	gyrA	N	D94N	2
SAMEA3209554	7581	G	A	Rv0006	280	Antibiotic Resistance	gyrA	N	D94N	4
SAMN06092281	7581	G	A	Rv0006	280	Antibiotic Resistance	gyrA	N	D94N	2
SAMN07236518	7581	G	A	Rv0006	280	Antibiotic Resistance	gyrA	N	D94N	2
SAMEA1707146	7581	G	A	Rv0006	280	Antibiotic Resistance	gyrA	N	D94N	2
SAMN08708991	7581	G	A	Rv0006	280	Antibiotic Resistance	gyrA	N	D94N	2
SAMEA3416724	7581	G	A	Rv0006	280	Antibiotic Resistance	gyrA	N	D94N	4
SAMD00117889	7581	G	A	Rv0006	280	Antibiotic Resistance	gyrA	N	D94N	2
SAMEA3558394	7581	G	A	Rv0006	280	Antibiotic Resistance	gyrA	N	D94N	2
SAMN02419574	7581	G	A	Rv0006	280	Antibiotic Resistance	gyrA	N	D94N	2
SAMEA5626305	7581	G	A	Rv0006	280	Antibiotic Resistance	gyrA	N	D94N	2
SAMEA1016098	7581	G	A	Rv0006	280	Antibiotic Resistance	gyrA	N	D94N	2
SAMN09708342	7581	G	A	Rv0006	280	Antibiotic Resistance	gyrA	N	D94N	3
SAMN02403456	7581	G	A	Rv0006	280	Antibiotic Resistance	gyrA	N	D94N	2
SAMN09708332	7581	G	A	Rv0006	280	Antibiotic Resistance	gyrA	N	D94N	2
SAMN08214932	7581	G	A	Rv0006	280	Antibiotic Resistance	gyrA	N	D94N	2
SAMN02585963	7581	G	A	Rv0006	280	Antibiotic Resistance	gyrA	N	D94N	4
SAMN02360566	7581	G	A	Rv0006	280	Antibiotic Resistance	gyrA	N	D94N	2
SAMEA2149968	7581	G	A	Rv0006	280	Antibiotic Resistance	gyrA	N	D94N	2
SAMN09099712	7581	G	A	Rv0006	280	Antibiotic Resistance	gyrA	N	D94N	2
SAMN08436231	7581	G	A	Rv0006	280	Antibiotic Resistance	gyrA	N	D94N	2
SAMEA95428168	7582	A	G	Rv0006	281	Antibiotic Resistance	gyrA	N	D94G	2
SAMN06579048	7582	A	G	Rv0006	281	Antibiotic Resistance	gyrA	N	D94G	3
SAMEA1405945	7582	A	G	Rv0006	281	Antibiotic Resistance	gyrA	N	D94G	4
SAMN10593121	7582	A	G	Rv0006	281	Antibiotic Resistance	gyrA	N	D94G	2
SAMN08892555	7582	A	G	Rv0006	281	Antibiotic Resistance	gyrA	N	D94G	3
SAMN10961402	7582	A	G	Rv0006	281	Antibiotic Resistance	gyrA	N	D94G	2
SAMEA1101537	7582	A	G	Rv0006	281	Antibiotic Resistance	gyrA	N	D94G	2
SAMN06920068	7582	A	G	Rv0006	281	Antibiotic Resistance	gyrA	N	D94G	2
SAMEA3443189	7582	A	G	Rv0006	281	Antibiotic Resistance	gyrA	N	D94G	2
SAMN10593104	7582	A	G	Rv0006	281	Antibiotic Resistance	gyrA	N	D94G	2
SAMN01925696	7582	A	G	Rv0006	281	Antibiotic Resistance	gyrA	N	D94G	2
SAMN01908879	7582	A	G	Rv0006	281	Antibiotic Resistance	gyrA	N	D94G	2
SAMN12551473	7582	A	G	Rv0006	281	Antibiotic Resistance	gyrA	N	D94G	2
SAMN07236271	7582	A	G	Rv0006	281	Antibiotic Resistance	gyrA	N	D94G	2
SAMN03648170	7582	A	G	Rv0006	281	Antibiotic Resistance	gyrA	N	D94G	4
SAMEA104614330	7582	A	G	Rv0006	281	Antibiotic Resistance	gyrA	N	D94G	2
SAMN06209998	7582	A	G	Rv0006	281	Antibiotic Resistance	gyrA	N	D94G	2
SAMN08732553	7582	A	G	Rv0006	281	Antibiotic Resistance	gyrA	N	D94G	2
SAMEA95530168	7582	A	G	Rv0006	281	Antibiotic Resistance	gyrA	N	D94G	2
SAMEA1102360	7582	A	G	Rv0006	281	Antibiotic Resistance	gyrA	N	D94G	2
SAMEA5569686	7582	A	G	Rv0006	281	Antibiotic Resistance	gyrA	N	D94G	2
SAMN05001043	7582	A	G	Rv0006	281	Antibiotic Resistance	gyrA	N	D94G	2
SAMEA3558181	7582	A	G	Rv0006	281	Antibiotic Resistance	gyrA	N	D94G	2
SAMN08379882	7582	A	G	Rv0006	281	Antibiotic Resistance	gyrA	N	D94G	2
SAMN08613033	7582	A	G	Rv0006	281	Antibiotic Resistance	gyrA	N	D94G	2
SAMN04633327	7582	A	G	Rv0006	281	Antibiotic Resistance	gyrA	N	D94G	2
SAMEA104614346	7582	A	G	Rv0006	281	Antibiotic Resistance	gyrA	N	D94G	2
SAMN08709097	7582	A	G	Rv0006	281	Antibiotic Resistance	gyrA	N	D94G	2
SAMEA1016054	7582	A	G	Rv0006	281	Antibiotic Resistance	gyrA	N	D94G	2
SAMN12551200	7582	A	G	Rv0006	281	Antibiotic Resistance	gyrA	N	D94G	2
SAMEA1102415	7582	A	G	Rv0006	281	Antibiotic Resistance	gyrA	N	D94G	4
SAMN07236275	7582	A	G	Rv0006	281	Antibiotic Resistance	gyrA	N	D94G	2
SAMEA2709782	7582	A	G	Rv0006	281	Antibiotic Resistance	gyrA	N	D94G	2
SAMN02419664	7582	A	G	Rv0006	281	Antibiotic Resistance	gyrA	N	D94G	2
SAMEA3420955	7582	A	G	Rv0006	281	Antibiotic Resistance	gyrA	N	D94G	2
SAMN08383172	7582	A	G	Rv0006	281	Antibiotic Resistance	gyrA	N	D94G	4
SAMEA1019041	7582	A	G	Rv0006	281	Antibiotic Resistance	gyrA	N	D94G	4
00R0312	7582	A	G	Rv0006	281	Antibiotic Resistance	gyrA	N	D94G	4
SAMN02398702	7582	A	G	Rv0006	281	Antibiotic Resistance	gyrA	N	D94G	2
SAMEA95446918	7582	A	G	Rv0006	281	Antibiotic Resistance	gyrA	N	D94G	2
SAMN02419637	7582	A	G	Rv0006	281	Antibiotic Resistance	gyrA	N	D94G	4
SAMD00117812	7582	A	G	Rv0006	281	Antibiotic Resistance	gyrA	N	D94G	2
SAMN02364080	7582	A	G	Rv0006	281	Antibiotic Resistance	gyrA	N	D94G	2
SAMEA2534097	7582	A	G	Rv0006	281	Antibiotic Resistance	gyrA	N	D94G	3
SAMEA3392387	7582	A	G	Rv0006	281	Antibiotic Resistance	gyrA	N	D94G	2
SAMEA3139831	7582	A	G	Rv0006	281	Antibiotic Resistance	gyrA	N	D94G	1
SAMEA95506918	7582	A	G	Rv0006	281	Antibiotic Resistance	gyrA	N	D94G	2
SAMEA3421191	7582	A	G	Rv0006	281	Antibiotic Resistance	gyrA	N	D94G	2
SAMEA95533168	7582	A	G	Rv0006	281	Antibiotic Resistance	gyrA	N	D94G	2
SAMN07978261	7582	A	G	Rv0006	281	Antibiotic Resistance	gyrA	N	D94G	4
SAMN08379753	7582	A	G	Rv0006	281	Antibiotic Resistance	gyrA	N	D94G	2
SAMN06055859	7582	A	G	Rv0006	281	Antibiotic Resistance	gyrA	N	D94G	2
03R0061	7582	A	G	Rv0006	281	Antibiotic Resistance	gyrA	N	D94G	4
SAMEA3558510	7582	A	G	Rv0006	281	Antibiotic Resistance	gyrA	N	D94G	2
SAMN05001039	7582	A	G	Rv0006	281	Antibiotic Resistance	gyrA	N	D94G	2
Peru5145	7582	A	G	Rv0006	281	Antibiotic Resistance	gyrA	N	D94G	2
SAMN12551554	7582	A	G	Rv0006	281	Antibiotic Resistance	gyrA	N	D94G	2
1479151773189T899115lib5770nextseqn0051151bp	7582	A	G	Rv0006	281	Antibiotic Resistance	gyrA	N	D94G	2
SAMEA3421189	7582	A	G	Rv0006	281	Antibiotic Resistance	gyrA	N	D94G	3
1479150601544T896815lib5750nextseqn0051151bp	7582	A	G	Rv0006	281	Antibiotic Resistance	gyrA	N	D94G	2
SAMN01908828	7582	A	G	Rv0006	281	Antibiotic Resistance	gyrA	N	D94G	2
SAMN06920071	7582	A	G	Rv0006	281	Antibiotic Resistance	gyrA	N	D94G	2
SAMN03648027	7582	A	G	Rv0006	281	Antibiotic Resistance	gyrA	N	D94G	3
SAMN08709250	7582	A	G	Rv0006	281	Antibiotic Resistance	gyrA	N	D94G	2
SAMEA2072840	7582	A	G	Rv0006	281	Antibiotic Resistance	gyrA	N	D94G	4
SAMN02402663	7582	A	G	Rv0006	281	Antibiotic Resistance	gyrA	N	D94G	2
SAMEA1019163	7582	A	G	Rv0006	281	Antibiotic Resistance	gyrA	N	D94G	4
SAMEA3421173	7582	A	G	Rv0006	281	Antibiotic Resistance	gyrA	N	D94G	2
SAMN01908888	7582	A	G	Rv0006	281	Antibiotic Resistance	gyrA	N	D94G	2
SAMN07236263	7582	A	G	Rv0006	281	Antibiotic Resistance	gyrA	N	D94G	1
SAMN09399430	7582	A	G	Rv0006	281	Antibiotic Resistance	gyrA	N	D94G	2
SAMN09100488	7582	A	G	Rv0006	281	Antibiotic Resistance	gyrA	N	D94G	2
SAMEA5626277	7582	A	G	Rv0006	281	Antibiotic Resistance	gyrA	N	D94G	3
SAMN06579069	7582	A	G	Rv0006	281	Antibiotic Resistance	gyrA	N	D94G	2
SAMD00117804	7582	A	G	Rv0006	281	Antibiotic Resistance	gyrA	N	D94G	2
SAMN06209983	7582	A	G	Rv0006	281	Antibiotic Resistance	gyrA	N	D94G	2
SAMN06920088	7582	A	G	Rv0006	281	Antibiotic Resistance	gyrA	N	D94G	2
SAMN08708826	7582	A	G	Rv0006	281	Antibiotic Resistance	gyrA	N	D94G	4
SAMN13169733	7582	A	G	Rv0006	281	Antibiotic Resistance	gyrA	N	D94G	4
SAMN04396841	7582	A	G	Rv0006	281	Antibiotic Resistance	gyrA	N	D94G	3
SAMN02419662	7582	A	G	Rv0006	281	Antibiotic Resistance	gyrA	N	D94G	2
SAMN03647145	7582	A	G	Rv0006	281	Antibiotic Resistance	gyrA	N	D94G	4
SAMN07236516	7582	A	G	Rv0006	281	Antibiotic Resistance	gyrA	N	D94G	2
SAMEA95411668	7582	A	G	Rv0006	281	Antibiotic Resistance	gyrA	N	D94G	2
SAMN07236261	7582	A	G	Rv0006	281	Antibiotic Resistance	gyrA	N	D94G	2
SAMN08708500	7582	A	G	Rv0006	281	Antibiotic Resistance	gyrA	N	D94G	2
SAMN10120074	7582	A	G	Rv0006	281	Antibiotic Resistance	gyrA	N	D94G	1
SAMEA3271652	7582	A	G	Rv0006	281	Antibiotic Resistance	gyrA	N	D94G	2
SAMEA3558347	7582	A	G	Rv0006	281	Antibiotic Resistance	gyrA	N	D94G	4
SAMN08709184	7582	A	G	Rv0006	281	Antibiotic Resistance	gyrA	N	D94G	2
SAMEA3414474	7582	A	G	Rv0006	281	Antibiotic Resistance	gyrA	N	D94G	4
SAMEA3558539	7582	A	G	Rv0006	281	Antibiotic Resistance	gyrA	N	D94G	4
SAMN01908848	7582	A	G	Rv0006	281	Antibiotic Resistance	gyrA	N	D94G	2
SAMN09715570	7582	A	G	Rv0006	281	Antibiotic Resistance	gyrA	N	D94G	2
SAMEA1016002	7582	A	G	Rv0006	281	Antibiotic Resistance	gyrA	N	D94G	2
SAMD00117822	7582	A	G	Rv0006	281	Antibiotic Resistance	gyrA	N	D94G	2
SAMEA95491918	7582	A	G	Rv0006	281	Antibiotic Resistance	gyrA	N	D94G	2
SAMD00117882	7582	A	G	Rv0006	281	Antibiotic Resistance	gyrA	N	D94G	2
SAMEA2534841	7582	A	G	Rv0006	281	Antibiotic Resistance	gyrA	N	D94G	4
SAMN04330047	7582	A	G	Rv0006	281	Antibiotic Resistance	gyrA	N	D94G	2
SAMN08892513	7582	A	G	Rv0006	281	Antibiotic Resistance	gyrA	N	D94G	3
SAMN05806773	7582	A	G	Rv0006	281	Antibiotic Resistance	gyrA	N	D94G	2
SAMN08708733	7582	A	G	Rv0006	281	Antibiotic Resistance	gyrA	N	D94G	2
1479150601544T896015lib5742nextseqn0051151bp	7582	A	G	Rv0006	281	Antibiotic Resistance	gyrA	N	D94G	2
SAMN07236254	7582	A	G	Rv0006	281	Antibiotic Resistance	gyrA	N	D94G	1
SAMEA3414206	7582	A	G	Rv0006	281	Antibiotic Resistance	gyrA	N	D94G	2
SAMEA3139853	7582	A	G	Rv0006	281	Antibiotic Resistance	gyrA	N	D94G	1
SAMEA5562524	7582	A	G	Rv0006	281	Antibiotic Resistance	gyrA	N	D94G	2
SAMEA1101759	7582	A	G	Rv0006	281	Antibiotic Resistance	gyrA	N	D94G	3
SAMN09399506	7582	A	G	Rv0006	281	Antibiotic Resistance	gyrA	N	D94G	2
SAMEA2781615	7582	A	G	Rv0006	281	Antibiotic Resistance	gyrA	N	D94G	2
SAMN06210057	7582	A	G	Rv0006	281	Antibiotic Resistance	gyrA	N	D94G	2
SAMN08708697	7582	A	G	Rv0006	281	Antibiotic Resistance	gyrA	N	D94G	2
SAMEA3558637	7582	A	G	Rv0006	281	Antibiotic Resistance	gyrA	N	D94G	4
SAMN09651705	7582	A	G	Rv0006	281	Antibiotic Resistance	gyrA	N	D94G	2
SAMEA3558611	7582	A	G	Rv0006	281	Antibiotic Resistance	gyrA	N	D94G	2
SAMEA1102645	7582	A	G	Rv0006	281	Antibiotic Resistance	gyrA	N	D94G	4
Peru5094	7582	A	G	Rv0006	281	Antibiotic Resistance	gyrA	N	D94G	4
SAMEA5626286	7582	A	G	Rv0006	281	Antibiotic Resistance	gyrA	N	D94G	3
SAMD00117771	7582	A	G	Rv0006	281	Antibiotic Resistance	gyrA	N	D94G	2
SAMEA1102655	7582	A	G	Rv0006	281	Antibiotic Resistance	gyrA	N	D94G	2
SAMN07659943	7582	A	G	Rv0006	281	Antibiotic Resistance	gyrA	N	D94G	2
SAMD00117898	7582	A	G	Rv0006	281	Antibiotic Resistance	gyrA	N	D94G	2
SAMEA95412418	7582	A	G	Rv0006	281	Antibiotic Resistance	gyrA	N	D94G	2
SAMEA4475183	7582	A	G	Rv0006	281	Antibiotic Resistance	gyrA	N	D94G	2
SAMEA4744466	7582	A	G	Rv0006	281	Antibiotic Resistance	gyrA	N	D94G	4
SAMN08709148	7582	A	G	Rv0006	281	Antibiotic Resistance	gyrA	N	D94G	2
SAMN06579059	7582	A	G	Rv0006	281	Antibiotic Resistance	gyrA	N	D94G	3
SAMN06579055	7582	A	G	Rv0006	281	Antibiotic Resistance	gyrA	N	D94G	2
SAMN06481156	7582	A	G	Rv0006	281	Antibiotic Resistance	gyrA	N	D94G	2
SAMEA1101459	7582	A	G	Rv0006	281	Antibiotic Resistance	gyrA	N	D94G	2
SAMN03647562	7582	A	G	Rv0006	281	Antibiotic Resistance	gyrA	N	D94G	4
SAMN07956544	7582	A	G	Rv0006	281	Antibiotic Resistance	gyrA	N	D94G	2
SAMN02419639	7582	A	G	Rv0006	281	Antibiotic Resistance	gyrA	N	D94G	2
SAMEA3558370	7582	A	G	Rv0006	281	Antibiotic Resistance	gyrA	N	D94G	4
SAMD00117828	7582	A	G	Rv0006	281	Antibiotic Resistance	gyrA	N	D94G	2
Peru5143	7582	A	G	Rv0006	281	Antibiotic Resistance	gyrA	N	D94G	2
SAMN01908889	7582	A	G	Rv0006	281	Antibiotic Resistance	gyrA	N	D94G	2
SAMEA1101724	7582	A	G	Rv0006	281	Antibiotic Resistance	gyrA	N	D94G	3
SAMEA1016152	7582	A	G	Rv0006	281	Antibiotic Resistance	gyrA	N	D94G	2
SAMEA1101671	7582	A	G	Rv0006	281	Antibiotic Resistance	gyrA	N	D94G	3
SAMN08626263	7582	A	G	Rv0006	281	Antibiotic Resistance	gyrA	N	D94G	2
SAMEA1101691	7582	A	G	Rv0006	281	Antibiotic Resistance	gyrA	N	D94G	3
1479149361993T894815lib5731nextseqn0051151bp	7582	A	G	Rv0006	281	Antibiotic Resistance	gyrA	N	D94G	2
SAMN03647400	7582	A	G	Rv0006	281	Antibiotic Resistance	gyrA	N	D94G	2
SAMN06092600	7582	A	G	Rv0006	281	Antibiotic Resistance	gyrA	N	D94G	2
SAMEA3443793	7582	A	G	Rv0006	281	Antibiotic Resistance	gyrA	N	D94G	2
SAMN02419561	7582	A	G	Rv0006	281	Antibiotic Resistance	gyrA	N	D94G	2
SAMN12551492	7582	A	G	Rv0006	281	Antibiotic Resistance	gyrA	N	D94G	2
SAMN10593557	7582	A	G	Rv0006	281	Antibiotic Resistance	gyrA	N	D94G	2
SAMEA3421181	7582	A	G	Rv0006	281	Antibiotic Resistance	gyrA	N	D94G	4
IDR1600000081	7582	A	G	Rv0006	281	Antibiotic Resistance	gyrA	N	D94G	2
SAMN06579094	7582	A	G	Rv0006	281	Antibiotic Resistance	gyrA	N	D94G	3
SAMN02419591	7582	A	G	Rv0006	281	Antibiotic Resistance	gyrA	N	D94G	2
SAMEA3921001	7582	A	G	Rv0006	281	Antibiotic Resistance	gyrA	N	D94G	2
SAMN04385634	7582	A	G	Rv0006	281	Antibiotic Resistance	gyrA	N	D94G	2
SAMN06209876	7582	A	G	Rv0006	281	Antibiotic Resistance	gyrA	N	D94G	2
Peru2909	7582	A	G	Rv0006	281	Antibiotic Resistance	gyrA	N	D94G	4
SAMEA5056379	7582	A	G	Rv0006	281	Antibiotic Resistance	gyrA	N	D94G	4
SAMEA95524168	7582	A	G	Rv0006	281	Antibiotic Resistance	gyrA	N	D94G	2
SAMN04633277	7582	A	G	Rv0006	281	Antibiotic Resistance	gyrA	N	D94G	2
SAMN02398695	7582	A	G	Rv0006	281	Antibiotic Resistance	gyrA	N	D94G	2
SAMEA1405984	7582	A	G	Rv0006	281	Antibiotic Resistance	gyrA	N	D94G	4
SAMEA1403791	7582	A	G	Rv0006	281	Antibiotic Resistance	gyrA	N	D94G	2
SAMEA1885992	7582	A	G	Rv0006	281	Antibiotic Resistance	gyrA	N	D94G	3
SAMEA3558146	7582	A	G	Rv0006	281	Antibiotic Resistance	gyrA	N	D94G	3
SAMN03647517	7582	A	G	Rv0006	281	Antibiotic Resistance	gyrA	N	D94G	4
SAMN06579111	7582	A	G	Rv0006	281	Antibiotic Resistance	gyrA	N	D94G	3
SAMD00117780	7582	A	G	Rv0006	281	Antibiotic Resistance	gyrA	N	D94G	2
99R887	7582	A	G	Rv0006	281	Antibiotic Resistance	gyrA	N	D94G	4
SAMN07956487	7582	A	G	Rv0006	281	Antibiotic Resistance	gyrA	N	D94G	4
SAMEA1101720	7582	A	G	Rv0006	281	Antibiotic Resistance	gyrA	N	D94G	3
SAMEA1019105	7582	A	G	Rv0006	281	Antibiotic Resistance	gyrA	N	D94G	4
SAMN08912838	7582	A	G	Rv0006	281	Antibiotic Resistance	gyrA	N	D94G	4
SAMEA3562789	7582	A	G	Rv0006	281	Antibiotic Resistance	gyrA	N	D94G	4
SAMEA3558564	7582	A	G	Rv0006	281	Antibiotic Resistance	gyrA	N	D94G	2
1479149361993T893915lib5722nextseqn0051151bp	7582	A	G	Rv0006	281	Antibiotic Resistance	gyrA	N	D94G	2
SAMN04633267	7582	A	G	Rv0006	281	Antibiotic Resistance	gyrA	N	D94G	2
SAMEA4370631	7582	A	G	Rv0006	281	Antibiotic Resistance	gyrA	N	D94G	2
SAMEA3444106	7582	A	G	Rv0006	281	Antibiotic Resistance	gyrA	N	D94G	2
SAMN04396862	7582	A	G	Rv0006	281	Antibiotic Resistance	gyrA	N	D94G	2
SAMEA3139844	7582	A	G	Rv0006	281	Antibiotic Resistance	gyrA	N	D94G	3
SAMN08851349	7582	A	G	Rv0006	281	Antibiotic Resistance	gyrA	N	D94G	4
SAMN04633328	7582	A	G	Rv0006	281	Antibiotic Resistance	gyrA	N	D94G	4
SAMN06209939	7582	A	G	Rv0006	281	Antibiotic Resistance	gyrA	N	D94G	2
SAMEA3443150	7582	A	G	Rv0006	281	Antibiotic Resistance	gyrA	N	D94G	2
SAMN07236284	7582	A	G	Rv0006	281	Antibiotic Resistance	gyrA	N	D94G	4
SAMN08347733	7582	A	G	Rv0006	281	Antibiotic Resistance	gyrA	N	D94G	2
SAMEA95527168	7582	A	G	Rv0006	281	Antibiotic Resistance	gyrA	N	D94G	2
SAMN04330060	7582	A	G	Rv0006	281	Antibiotic Resistance	gyrA	N	D94G	4
SAMEA1469518	7582	A	G	Rv0006	281	Antibiotic Resistance	gyrA	N	D94G	2
1479151773189T898715lib5766nextseqn0051151bp	7582	A	G	Rv0006	281	Antibiotic Resistance	gyrA	N	D94G	2
SAMD00117899	7582	A	G	Rv0006	281	Antibiotic Resistance	gyrA	N	D94G	2
SAMEA5056432	7582	A	G	Rv0006	281	Antibiotic Resistance	gyrA	N	D94G	4
SAMN10961336	7582	A	G	Rv0006	281	Antibiotic Resistance	gyrA	N	D94G	2
SAMEA1403972	7582	A	G	Rv0006	281	Antibiotic Resistance	gyrA	N	D94G	2
SAMN08383205	7582	A	G	Rv0006	281	Antibiotic Resistance	gyrA	N	D94G	4
SAMEA1403689	7582	A	G	Rv0006	281	Antibiotic Resistance	gyrA	N	D94G	2
SAMEA5626253	7582	A	G	Rv0006	281	Antibiotic Resistance	gyrA	N	D94G	3
SAMEA3921004	7582	A	G	Rv0006	281	Antibiotic Resistance	gyrA	N	D94G	2
SAMEA2343219	7582	A	G	Rv0006	281	Antibiotic Resistance	gyrA	N	D94G	2
SAMN06579067	7582	A	G	Rv0006	281	Antibiotic Resistance	gyrA	N	D94G	3
SAMN02364079	7582	A	G	Rv0006	281	Antibiotic Resistance	gyrA	N	D94G	2
SAMEA104614341	7582	A	G	Rv0006	281	Antibiotic Resistance	gyrA	N	D94G	2
SAMN10448625	7582	A	G	Rv0006	281	Antibiotic Resistance	gyrA	N	D94G	2
SAMEA3562768	7582	A	G	Rv0006	281	Antibiotic Resistance	gyrA	N	D94G	4
SAMN02364078	7582	A	G	Rv0006	281	Antibiotic Resistance	gyrA	N	D94G	2
1479150601544T896615lib5748nextseqn0051151bp	7582	A	G	Rv0006	281	Antibiotic Resistance	gyrA	N	D94G	2
SAMEA2709845	7582	A	G	Rv0006	281	Antibiotic Resistance	gyrA	N	D94G	2
SAMEA95517418	7582	A	G	Rv0006	281	Antibiotic Resistance	gyrA	N	D94G	2
SAMN12551508	7582	A	G	Rv0006	281	Antibiotic Resistance	gyrA	N	D94G	2
SAMN08708901	7582	A	G	Rv0006	281	Antibiotic Resistance	gyrA	N	D94G	2
SAMEA95428918	7582	A	G	Rv0006	281	Antibiotic Resistance	gyrA	N	D94G	4
SAMN03648978	7582	A	G	Rv0006	281	Antibiotic Resistance	gyrA	N	D94G	2
SAMEA1403698	7582	A	G	Rv0006	281	Antibiotic Resistance	gyrA	N	D94G	2
SAMN03648631	7582	A	G	Rv0006	281	Antibiotic Resistance	gyrA	N	D94G	2
SAMN04633295	7582	A	G	Rv0006	281	Antibiotic Resistance	gyrA	N	D94G	4
SAMEA5282458	7582	A	G	Rv0006	281	Antibiotic Resistance	gyrA	N	D94G	4
SAMN08892445	7582	A	G	Rv0006	281	Antibiotic Resistance	gyrA	N	D94G	2
1479151773189T1378514lib3416nextseqn0004151bp	7582	A	G	Rv0006	281	Antibiotic Resistance	gyrA	N	D94G	2
SAMD00117813	7582	A	G	Rv0006	281	Antibiotic Resistance	gyrA	N	D94G	2
SAMEA3392627	7582	A	G	Rv0006	281	Antibiotic Resistance	gyrA	N	D94G	4
SAMN02360598	7582	A	G	Rv0006	281	Antibiotic Resistance	gyrA	N	D94G	2
SAMEA1119138	7582	A	G	Rv0006	281	Antibiotic Resistance	gyrA	N	D94G	4
SAMEA4475182	7582	A	G	Rv0006	281	Antibiotic Resistance	gyrA	N	D94G	2
SAMN02419636	7582	A	G	Rv0006	281	Antibiotic Resistance	gyrA	N	D94G	2
SAMN01908846	7582	A	G	Rv0006	281	Antibiotic Resistance	gyrA	N	D94G	2
SAMN08708602	7582	A	G	Rv0006	281	Antibiotic Resistance	gyrA	N	D94G	2
SAMEA1102284	7582	A	G	Rv0006	281	Antibiotic Resistance	gyrA	N	D94G	3
SAMEA1118851	7582	A	G	Rv0006	281	Antibiotic Resistance	gyrA	N	D94G	1
SAMN06209889	7582	A	G	Rv0006	281	Antibiotic Resistance	gyrA	N	D94G	2
SAMEA1406048	7582	A	G	Rv0006	281	Antibiotic Resistance	gyrA	N	D94G	1
Peru4709	7582	A	G	Rv0006	281	Antibiotic Resistance	gyrA	N	D94G	2
SAMN02419566	7582	A	G	Rv0006	281	Antibiotic Resistance	gyrA	N	D94G	4
SAMN06579130	7582	A	G	Rv0006	281	Antibiotic Resistance	gyrA	N	D94G	2
SAMEA3139838	7582	A	G	Rv0006	281	Antibiotic Resistance	gyrA	N	D94G	3
SAMEA1885909	7582	A	G	Rv0006	281	Antibiotic Resistance	gyrA	N	D94G	4
SAMN02628500	7582	A	G	Rv0006	281	Antibiotic Resistance	gyrA	N	D94G	2
SAMN09756304	7582	A	G	Rv0006	281	Antibiotic Resistance	gyrA	N	D94G	2
SAMEA5626260	7582	A	G	Rv0006	281	Antibiotic Resistance	gyrA	N	D94G	3
SAMEA3715670	7582	A	G	Rv0006	281	Antibiotic Resistance	gyrA	N	D94G	2
SAMEA2709830	7582	A	G	Rv0006	281	Antibiotic Resistance	gyrA	N	D94G	4
SAMEA1403834	7582	A	G	Rv0006	281	Antibiotic Resistance	gyrA	N	D94G	2
SAMD00117761	7582	A	G	Rv0006	281	Antibiotic Resistance	gyrA	N	D94G	2
SAMN05806760	7582	A	G	Rv0006	281	Antibiotic Resistance	gyrA	N	D94G	1
SAMEA1707505	7582	A	G	Rv0006	281	Antibiotic Resistance	gyrA	N	D94G	2
SAMN04385672	7582	A	G	Rv0006	281	Antibiotic Resistance	gyrA	N	D94G	2
SAMEA104394516	7582	A	G	Rv0006	281	Antibiotic Resistance	gyrA	N	D94G	4
SAMN03647894	7582	A	G	Rv0006	281	Antibiotic Resistance	gyrA	N	D94G	4
SAMEA4798884	7582	A	G	Rv0006	281	Antibiotic Resistance	gyrA	N	D94G	4
SAMEA5562527	7582	A	G	Rv0006	281	Antibiotic Resistance	gyrA	N	D94G	2
SAMN06210094	7582	A	G	Rv0006	281	Antibiotic Resistance	gyrA	N	D94G	2
SAMN04385696	7582	A	G	Rv0006	281	Antibiotic Resistance	gyrA	N	D94G	2
SAMN03648813	7582	A	G	Rv0006	281	Antibiotic Resistance	gyrA	N	D94G	4
SAMEA3392675	7582	A	G	Rv0006	281	Antibiotic Resistance	gyrA	N	D94G	4
SAMEA1101706	7582	A	G	Rv0006	281	Antibiotic Resistance	gyrA	N	D94G	2
SAMEA95434168	7582	A	G	Rv0006	281	Antibiotic Resistance	gyrA	N	D94G	2
SAMN04385636	7582	A	G	Rv0006	281	Antibiotic Resistance	gyrA	N	D94G	2
SAMN08637037	7582	A	G	Rv0006	281	Antibiotic Resistance	gyrA	N	D94G	2
SAMN02398714	7582	A	G	Rv0006	281	Antibiotic Resistance	gyrA	N	D94G	2
SAMN07236526	7582	A	G	Rv0006	281	Antibiotic Resistance	gyrA	N	D94G	2
SAMEA3359351	7582	A	G	Rv0006	281	Antibiotic Resistance	gyrA	N	D94G	2
SAMN07236515	7582	A	G	Rv0006	281	Antibiotic Resistance	gyrA	N	D94G	2
SAMN12551555	7582	A	G	Rv0006	281	Antibiotic Resistance	gyrA	N	D94G	2
SAMN12551153	7582	A	G	Rv0006	281	Antibiotic Resistance	gyrA	N	D94G	2
SAMD00117789	7582	A	G	Rv0006	281	Antibiotic Resistance	gyrA	N	D94G	2
SAMEA1101747	7582	A	G	Rv0006	281	Antibiotic Resistance	gyrA	N	D94G	3
SAMEA1119847	7582	A	G	Rv0006	281	Antibiotic Resistance	gyrA	N	D94G	4
SAMEA4370635	7582	A	G	Rv0006	281	Antibiotic Resistance	gyrA	N	D94G	2
SAMN06092166	7582	A	G	Rv0006	281	Antibiotic Resistance	gyrA	N	D94G	4
SAMN06142915	7582	A	G	Rv0006	281	Antibiotic Resistance	gyrA	N	D94G	2
SAMEA3139840	7582	A	G	Rv0006	281	Antibiotic Resistance	gyrA	N	D94G	3
SAMN05001057	7582	A	G	Rv0006	281	Antibiotic Resistance	gyrA	N	D94G	2
SAMN08913183	7582	A	G	Rv0006	281	Antibiotic Resistance	gyrA	N	D94G	2
SAMN05001058	7582	A	G	Rv0006	281	Antibiotic Resistance	gyrA	N	D94G	2
01R1321	7582	A	G	Rv0006	281	Antibiotic Resistance	gyrA	N	D94G	2
SAMN07956566	7582	A	G	Rv0006	281	Antibiotic Resistance	gyrA	N	D94G	2
SAMEA1015962	7582	A	G	Rv0006	281	Antibiotic Resistance	gyrA	N	D94G	2
SAMN08629393	7582	A	G	Rv0006	281	Antibiotic Resistance	gyrA	N	D94G	1
SAMN09914637	7582	A	G	Rv0006	281	Antibiotic Resistance	gyrA	N	D94G	4
SAMEA1102638	7582	A	G	Rv0006	281	Antibiotic Resistance	gyrA	N	D94G	2
SAMN06578974	7582	A	G	Rv0006	281	Antibiotic Resistance	gyrA	N	D94G	3
SAMN09756217	7582	A	G	Rv0006	281	Antibiotic Resistance	gyrA	N	D94G	2
SAMN08143522	7582	A	G	Rv0006	281	Antibiotic Resistance	gyrA	N	D94G	2
SAMD00117798	7582	A	G	Rv0006	281	Antibiotic Resistance	gyrA	N	D94G	4
SAMEA961623	7582	A	G	Rv0006	281	Antibiotic Resistance	gyrA	N	D94G	4
SAMN06092001	7582	A	G	Rv0006	281	Antibiotic Resistance	gyrA	N	D94G	2
SAMN08708963	7582	A	G	Rv0006	281	Antibiotic Resistance	gyrA	N	D94G	2
SAMN08795245	7582	A	G	Rv0006	281	Antibiotic Resistance	gyrA	N	D94G	2
SAMN07236281	7582	A	G	Rv0006	281	Antibiotic Resistance	gyrA	N	D94G	2
SAMEA1019057	7582	A	G	Rv0006	281	Antibiotic Resistance	gyrA	N	D94G	4
SAMD00117815	7582	A	G	Rv0006	281	Antibiotic Resistance	gyrA	N	D94G	2
SAMEA1469497	7582	A	G	Rv0006	281	Antibiotic Resistance	gyrA	N	D94G	2
SAMEA3558792	7582	A	G	Rv0006	281	Antibiotic Resistance	gyrA	N	D94G	4
SAMN05328082	7582	A	G	Rv0006	281	Antibiotic Resistance	gyrA	N	D94G	2
SAMEA2709688	7582	A	G	Rv0006	281	Antibiotic Resistance	gyrA	N	D94G	2
SAMN04534875	7582	A	G	Rv0006	281	Antibiotic Resistance	gyrA	N	D94G	2
SAMN07236321	7582	A	G	Rv0006	281	Antibiotic Resistance	gyrA	N	D94G	2
SAMEA1403847	7582	A	G	Rv0006	281	Antibiotic Resistance	gyrA	N	D94G	2
SAMN05806770	7582	A	G	Rv0006	281	Antibiotic Resistance	gyrA	N	D94G	3
Peru4711	7582	A	G	Rv0006	281	Antibiotic Resistance	gyrA	N	D94G	2
SAMEA1118728	7582	A	G	Rv0006	281	Antibiotic Resistance	gyrA	N	D94G	3
SAMEA4744276	7582	A	G	Rv0006	281	Antibiotic Resistance	gyrA	N	D94G	4
SAMN06209969	7582	A	G	Rv0006	281	Antibiotic Resistance	gyrA	N	D94G	2
SAMN08629064	7582	A	G	Rv0006	281	Antibiotic Resistance	gyrA	N	D94G	1
SAMEA3558823	7582	A	G	Rv0006	281	Antibiotic Resistance	gyrA	N	D94G	4
SAMN06579043	7582	A	G	Rv0006	281	Antibiotic Resistance	gyrA	N	D94G	3
SAMN06579106	7582	A	G	Rv0006	281	Antibiotic Resistance	gyrA	N	D94G	2
SAMN04534876	7582	A	G	Rv0006	281	Antibiotic Resistance	gyrA	N	D94G	2
SAMEA95537668	7582	A	G	Rv0006	281	Antibiotic Resistance	gyrA	N	D94G	4
SAMN07236274	7582	A	G	Rv0006	281	Antibiotic Resistance	gyrA	N	D94G	2
SAMN07236437	7582	A	G	Rv0006	281	Antibiotic Resistance	gyrA	N	D94G	1
SAMN09914621	7582	A	G	Rv0006	281	Antibiotic Resistance	gyrA	N	D94G	2
SAMEA95501668	7582	A	G	Rv0006	281	Antibiotic Resistance	gyrA	N	D94G	2
SAMEA1707213	7582	A	G	Rv0006	281	Antibiotic Resistance	gyrA	N	D94G	2
SAMN07236277	7582	A	G	Rv0006	281	Antibiotic Resistance	gyrA	N	D94G	4
SAMN02586072	7582	A	G	Rv0006	281	Antibiotic Resistance	gyrA	N	D94G	2
SAMEA1101815	7582	A	G	Rv0006	281	Antibiotic Resistance	gyrA	N	D94G	3
SAMEA1406043	7582	A	G	Rv0006	281	Antibiotic Resistance	gyrA	N	D94G	4
SAMEA1403730	7582	A	G	Rv0006	281	Antibiotic Resistance	gyrA	N	D94G	2
SAMN08629570	7582	A	G	Rv0006	281	Antibiotic Resistance	gyrA	N	D94G	1
SAMEA3258487	7582	A	G	Rv0006	281	Antibiotic Resistance	gyrA	N	D94G	2
SAMEA3420926	7582	A	G	Rv0006	281	Antibiotic Resistance	gyrA	N	D94G	3
SAMN02403483	7582	A	G	Rv0006	281	Antibiotic Resistance	gyrA	N	D94G	2
SAMEA5626320	7582	A	G	Rv0006	281	Antibiotic Resistance	gyrA	N	D94G	3
SAMD00117803	7582	A	G	Rv0006	281	Antibiotic Resistance	gyrA	N	D94G	2
SAMEA1016101	7582	A	G	Rv0006	281	Antibiotic Resistance	gyrA	N	D94G	2
SAMN07998980	7582	A	G	Rv0006	281	Antibiotic Resistance	gyrA	N	D94G	2
SAMEA3558405	7582	A	G	Rv0006	281	Antibiotic Resistance	gyrA	N	D94G	4
SAMN06210024	7582	A	G	Rv0006	281	Antibiotic Resistance	gyrA	N	D94G	4
SAMN08892511	7582	A	G	Rv0006	281	Antibiotic Resistance	gyrA	N	D94G	3
SAMN05001036	7582	A	G	Rv0006	281	Antibiotic Resistance	gyrA	N	D94G	2
SAMN09402669	7582	A	G	Rv0006	281	Antibiotic Resistance	gyrA	N	D94G	4
SAMEA2534642	7582	A	G	Rv0006	281	Antibiotic Resistance	gyrA	N	D94G	2
SAMEA3558610	7582	A	G	Rv0006	281	Antibiotic Resistance	gyrA	N	D94G	2
SAMD00117767	7582	A	G	Rv0006	281	Antibiotic Resistance	gyrA	N	D94G	4
SAMEA1102261	7582	A	G	Rv0006	281	Antibiotic Resistance	gyrA	N	D94G	3
SAMN06209885	7582	A	G	Rv0006	281	Antibiotic Resistance	gyrA	N	D94G	4
SAMEA1102297	7582	A	G	Rv0006	281	Antibiotic Resistance	gyrA	N	D94G	3
SAMN08709300	7582	A	G	Rv0006	281	Antibiotic Resistance	gyrA	N	D94G	2
SAMEA2151720	7582	A	G	Rv0006	281	Antibiotic Resistance	gyrA	N	D94G	2
SAMEA3558728	7582	A	G	Rv0006	281	Antibiotic Resistance	gyrA	N	D94G	4
SAMN13169632	7582	A	G	Rv0006	281	Antibiotic Resistance	gyrA	N	D94G	2
SAMN06578972	7582	A	G	Rv0006	281	Antibiotic Resistance	gyrA	N	D94G	3
02R1789	7582	A	G	Rv0006	281	Antibiotic Resistance	gyrA	N	D94G	2
SAMEA1403617	7582	A	G	Rv0006	281	Antibiotic Resistance	gyrA	N	D94G	2
SAMEA3558786	7582	A	G	Rv0006	281	Antibiotic Resistance	gyrA	N	D94G	4
SAMEA1707516	7582	A	G	Rv0006	281	Antibiotic Resistance	gyrA	N	D94G	2
SAMN03648066	7582	A	G	Rv0006	281	Antibiotic Resistance	gyrA	N	D94G	4
SAMN08709255	7582	A	G	Rv0006	281	Antibiotic Resistance	gyrA	N	D94G	2
SAMEA3432966	7582	A	G	Rv0006	281	Antibiotic Resistance	gyrA	N	D94G	2
SAMN06142914	7582	A	G	Rv0006	281	Antibiotic Resistance	gyrA	N	D94G	2
SAMEA5626310	7582	A	G	Rv0006	281	Antibiotic Resistance	gyrA	N	D94G	3
SAMN08708684	7582	A	G	Rv0006	281	Antibiotic Resistance	gyrA	N	D94G	2
SAMEA3558740	7582	A	G	Rv0006	281	Antibiotic Resistance	gyrA	N	D94G	4
SAMN09914707	7582	A	G	Rv0006	281	Antibiotic Resistance	gyrA	N	D94G	4
SAMN08892485	7582	A	G	Rv0006	281	Antibiotic Resistance	gyrA	N	D94G	3
SAMEA1102345	7582	A	G	Rv0006	281	Antibiotic Resistance	gyrA	N	D94G	3
SAMN08613052	7582	A	G	Rv0006	281	Antibiotic Resistance	gyrA	N	D94G	2
SAMN09914726	7582	A	G	Rv0006	281	Antibiotic Resistance	gyrA	N	D94G	2
SAMEA5626245	7582	A	G	Rv0006	281	Antibiotic Resistance	gyrA	N	D94G	3
SAMEA95435668	7582	A	G	Rv0006	281	Antibiotic Resistance	gyrA	N	D94G	2
SAMN08347767	7582	A	G	Rv0006	281	Antibiotic Resistance	gyrA	N	D94G	2
SAMEA1101888	7582	A	G	Rv0006	281	Antibiotic Resistance	gyrA	N	D94G	3
SAMN05806758	7582	A	G	Rv0006	281	Antibiotic Resistance	gyrA	N	D94G	2
SAMEA3232151	7582	A	G	Rv0006	281	Antibiotic Resistance	gyrA	N	D94G	2
SAMN08379675	7582	A	G	Rv0006	281	Antibiotic Resistance	gyrA	N	D94G	2
SAMN06209973	7582	A	G	Rv0006	281	Antibiotic Resistance	gyrA	N	D94G	2
SAMN12551176	7582	A	G	Rv0006	281	Antibiotic Resistance	gyrA	N	D94G	2
SAMEA3139857	7582	A	G	Rv0006	281	Antibiotic Resistance	gyrA	N	D94G	3
SAMN09651605	7582	A	G	Rv0006	281	Antibiotic Resistance	gyrA	N	D94G	2
SAMEA4473376	7582	A	G	Rv0006	281	Antibiotic Resistance	gyrA	N	D94G	4
SAMN06142916	7582	A	G	Rv0006	281	Antibiotic Resistance	gyrA	N	D94G	2
SAMEA2535204	7582	A	G	Rv0006	281	Antibiotic Resistance	gyrA	N	D94G	2
SAMN02419667	7582	A	G	Rv0006	281	Antibiotic Resistance	gyrA	N	D94G	2
SAMN05001060	7582	A	G	Rv0006	281	Antibiotic Resistance	gyrA	N	D94G	2
SAMN06209941	7582	A	G	Rv0006	281	Antibiotic Resistance	gyrA	N	D94G	2
SAMD00117883	7582	A	G	Rv0006	281	Antibiotic Resistance	gyrA	N	D94G	2
SAMN02419634	7582	A	G	Rv0006	281	Antibiotic Resistance	gyrA	N	D94G	2
SAMN02628498	7582	A	G	Rv0006	281	Antibiotic Resistance	gyrA	N	D94G	2
SAMEA95414668	7582	A	G	Rv0006	281	Antibiotic Resistance	gyrA	N	D94G	4
SAMN08892439	7582	A	G	Rv0006	281	Antibiotic Resistance	gyrA	N	D94G	2
SAMEA1469509	7582	A	G	Rv0006	281	Antibiotic Resistance	gyrA	N	D94G	2
SAMN01908813	7582	A	G	Rv0006	281	Antibiotic Resistance	gyrA	N	D94G	2
02R1687	7582	A	G	Rv0006	281	Antibiotic Resistance	gyrA	N	D94G	4
1479149361993T895215lib5734nextseqn0051151bp	7582	A	G	Rv0006	281	Antibiotic Resistance	gyrA	N	D94G	2
SAMN08379877	7582	A	G	Rv0006	281	Antibiotic Resistance	gyrA	N	D94G	2
SAMEA3558132	7582	A	G	Rv0006	281	Antibiotic Resistance	gyrA	N	D94G	3
SAMN07236535	7582	A	G	Rv0006	281	Antibiotic Resistance	gyrA	N	D94G	2
00R0453	7582	A	G	Rv0006	281	Antibiotic Resistance	gyrA	N	D94G	4
SAMN08612751	7582	A	G	Rv0006	281	Antibiotic Resistance	gyrA	N	D94G	2
SAMD00117873	7582	A	G	Rv0006	281	Antibiotic Resistance	gyrA	N	D94G	2
SAMEA5626308	7582	A	G	Rv0006	281	Antibiotic Resistance	gyrA	N	D94G	3
SAMN05806761	7582	A	G	Rv0006	281	Antibiotic Resistance	gyrA	N	D94G	2
Peru4955	7582	A	G	Rv0006	281	Antibiotic Resistance	gyrA	N	D94G	4
SAMEA5626303	7582	A	G	Rv0006	281	Antibiotic Resistance	gyrA	N	D94G	3
SAMN02419577	7582	A	G	Rv0006	281	Antibiotic Resistance	gyrA	N	D94G	2
SAMN02419602	7582	A	G	Rv0006	281	Antibiotic Resistance	gyrA	N	D94G	2
SAMEA1102305	7582	A	G	Rv0006	281	Antibiotic Resistance	gyrA	N	D94G	3
SAMEA5562525	7582	A	G	Rv0006	281	Antibiotic Resistance	gyrA	N	D94G	2
SAMEA3558821	7582	A	G	Rv0006	281	Antibiotic Resistance	gyrA	N	D94G	4
SAMD00117904	7582	A	G	Rv0006	281	Antibiotic Resistance	gyrA	N	D94G	2
SAMN08708152	7582	A	G	Rv0006	281	Antibiotic Resistance	gyrA	N	D94G	2
IDR1300019614	7582	A	G	Rv0006	281	Antibiotic Resistance	gyrA	N	D94G	4
Peru4571	7582	A	G	Rv0006	281	Antibiotic Resistance	gyrA	N	D94G	2
SAMEA95416168	7582	A	G	Rv0006	281	Antibiotic Resistance	gyrA	N	D94G	2
SAMEA1403892	7582	A	G	Rv0006	281	Antibiotic Resistance	gyrA	N	D94G	2
SAMN10448623	7582	A	G	Rv0006	281	Antibiotic Resistance	gyrA	N	D94G	2
SAMEA1019112	7582	A	G	Rv0006	281	Antibiotic Resistance	gyrA	N	D94G	4
SAMEA5626306	7582	A	G	Rv0006	281	Antibiotic Resistance	gyrA	N	D94G	2
SAMN02360616	7582	A	G	Rv0006	281	Antibiotic Resistance	gyrA	N	D94G	2
SAMEA95433418	7582	A	G	Rv0006	281	Antibiotic Resistance	gyrA	N	D94G	2
SAMEA1403783	7582	A	G	Rv0006	281	Antibiotic Resistance	gyrA	N	D94G	2
SAMEA5626299	7582	A	G	Rv0006	281	Antibiotic Resistance	gyrA	N	D94G	3
SAMEA1103119	7582	A	G	Rv0006	281	Antibiotic Resistance	gyrA	N	D94G	2
SAMEA95521168	7582	A	G	Rv0006	281	Antibiotic Resistance	gyrA	N	D94G	2
SAMEA104614413	7582	A	G	Rv0006	281	Antibiotic Resistance	gyrA	N	D94G	1
SAMN08143534	7582	A	G	Rv0006	281	Antibiotic Resistance	gyrA	N	D94G	2
SAMN02419541	7582	A	G	Rv0006	281	Antibiotic Resistance	gyrA	N	D94G	2
SAMEA1102329	7582	A	G	Rv0006	281	Antibiotic Resistance	gyrA	N	D94G	3
SAMEA1103145	7582	A	G	Rv0006	281	Antibiotic Resistance	gyrA	N	D94G	2
SAMEA95410168	7582	A	G	Rv0006	281	Antibiotic Resistance	gyrA	N	D94G	2
SAMEA104172427	7582	A	G	Rv0006	281	Antibiotic Resistance	gyrA	N	D94G	2
03R1373	7582	A	G	Rv0006	281	Antibiotic Resistance	gyrA	N	D94G	4
SAMN08708593	7582	A	G	Rv0006	281	Antibiotic Resistance	gyrA	N	D94G	2
SAMN09399499	7582	A	G	Rv0006	281	Antibiotic Resistance	gyrA	N	D94G	4
SAMEA1403569	7582	A	G	Rv0006	281	Antibiotic Resistance	gyrA	N	D94G	2
SAMEA104362364	7582	A	G	Rv0006	281	Antibiotic Resistance	gyrA	N	D94G	4
SAMEA95413168	7582	A	G	Rv0006	281	Antibiotic Resistance	gyrA	N	D94G	2
SAMN08851369	7582	A	G	Rv0006	281	Antibiotic Resistance	gyrA	N	D94G	2
SAMEA3139843	7582	A	G	Rv0006	281	Antibiotic Resistance	gyrA	N	D94G	3
SAMN01908794	7582	A	G	Rv0006	281	Antibiotic Resistance	gyrA	N	D94G	2
SAMEA1101524	7582	A	G	Rv0006	281	Antibiotic Resistance	gyrA	N	D94G	3
SAMEA5569571	7582	A	G	Rv0006	281	Antibiotic Resistance	gyrA	N	D94G	4
SAMN06092194	7582	A	G	Rv0006	281	Antibiotic Resistance	gyrA	N	D94G	2
SAMEA1119125	7582	A	G	Rv0006	281	Antibiotic Resistance	gyrA	N	D94G	4
02R1641	7582	A	G	Rv0006	281	Antibiotic Resistance	gyrA	N	D94G	2
SAMEA5626264	7582	A	G	Rv0006	281	Antibiotic Resistance	gyrA	N	D94G	3
SAMN09101286	7582	A	G	Rv0006	281	Antibiotic Resistance	gyrA	N	D94G	1
SAMN02414987	7582	A	G	Rv0006	281	Antibiotic Resistance	gyrA	N	D94G	2
SAMEA3558729	7582	A	G	Rv0006	281	Antibiotic Resistance	gyrA	N	D94G	4
SAMEA1405924	7582	A	G	Rv0006	281	Antibiotic Resistance	gyrA	N	D94G	2
SAMN08626280	7582	A	G	Rv0006	281	Antibiotic Resistance	gyrA	N	D94G	2
SAMEA5626313	7582	A	G	Rv0006	281	Antibiotic Resistance	gyrA	N	D94G	3
SAMN08708170	7582	A	G	Rv0006	281	Antibiotic Resistance	gyrA	N	D94G	2
SAMEA95444668	7582	A	G	Rv0006	281	Antibiotic Resistance	gyrA	N	D94G	2
SAMN04396888	7582	A	G	Rv0006	281	Antibiotic Resistance	gyrA	N	D94G	4
NLA000801697	7582	A	G	Rv0006	281	Antibiotic Resistance	gyrA	N	D94G	4
SAMEA3258493	7582	A	G	Rv0006	281	Antibiotic Resistance	gyrA	N	D94G	2
SAMEA95538418	7582	A	G	Rv0006	281	Antibiotic Resistance	gyrA	N	D94G	2
SAMN06473179	7582	A	G	Rv0006	281	Antibiotic Resistance	gyrA	N	D94G	2
SAMN06209873	7582	A	G	Rv0006	281	Antibiotic Resistance	gyrA	N	D94G	2
SAMN09101377	7582	A	G	Rv0006	281	Antibiotic Resistance	gyrA	N	D94G	3
SAMN13169520	7582	A	G	Rv0006	281	Antibiotic Resistance	gyrA	N	D94G	2
SAMEA1570059	7582	A	G	Rv0006	281	Antibiotic Resistance	gyrA	N	D94G	2
SAMEA3442732	7582	A	G	Rv0006	281	Antibiotic Resistance	gyrA	N	D94G	2
SAMN03647149	7582	A	G	Rv0006	281	Antibiotic Resistance	gyrA	N	D94G	3
SAMEA1469506	7582	A	G	Rv0006	281	Antibiotic Resistance	gyrA	N	D94G	2
SAMN06209991	7582	A	G	Rv0006	281	Antibiotic Resistance	gyrA	N	D94G	2
SAMEA95505418	7582	A	G	Rv0006	281	Antibiotic Resistance	gyrA	N	D94G	2
SAMN01908834	7582	A	G	Rv0006	281	Antibiotic Resistance	gyrA	N	D94G	2
SAMD00117893	7582	A	G	Rv0006	281	Antibiotic Resistance	gyrA	N	D94G	2
SAMN02585967	7582	A	G	Rv0006	281	Antibiotic Resistance	gyrA	N	D94G	4
SAMEA1015943	7582	A	G	Rv0006	281	Antibiotic Resistance	gyrA	N	D94G	2
SAMN04396840	7582	A	G	Rv0006	281	Antibiotic Resistance	gyrA	N	D94G	3
SAMN08708299	7582	A	G	Rv0006	281	Antibiotic Resistance	gyrA	N	D94G	2
SAMN10593131	7582	A	G	Rv0006	281	Antibiotic Resistance	gyrA	N	D94G	2
SAMEA95512168	7582	A	G	Rv0006	281	Antibiotic Resistance	gyrA	N	D94G	2
SAMN02585961	7582	A	G	Rv0006	281	Antibiotic Resistance	gyrA	N	D94G	4
SAMN07331226	7582	A	G	Rv0006	281	Antibiotic Resistance	gyrA	N	D94G	2
SAMN08708300	7582	A	G	Rv0006	281	Antibiotic Resistance	gyrA	N	D94G	2
SAMEA1101611	7582	A	G	Rv0006	281	Antibiotic Resistance	gyrA	N	D94G	3
SAMN08892515	7582	A	G	Rv0006	281	Antibiotic Resistance	gyrA	N	D94G	3
SAMN07659437	7582	A	G	Rv0006	281	Antibiotic Resistance	gyrA	N	D94G	2
SAMN08892494	7582	A	G	Rv0006	281	Antibiotic Resistance	gyrA	N	D94G	4
SAMN08347763	7582	A	G	Rv0006	281	Antibiotic Resistance	gyrA	N	D94G	2
SAMN09756297	7582	A	G	Rv0006	281	Antibiotic Resistance	gyrA	N	D94G	4
SAMN07236514	7582	A	G	Rv0006	281	Antibiotic Resistance	gyrA	N	D94G	2
SAMN09651775	7582	A	G	Rv0006	281	Antibiotic Resistance	gyrA	N	D94G	2
02R0328	7582	A	G	Rv0006	281	Antibiotic Resistance	gyrA	N	D94G	2
SAMN08637023	7582	A	G	Rv0006	281	Antibiotic Resistance	gyrA	N	D94G	4
Peru3354	7582	A	G	Rv0006	281	Antibiotic Resistance	gyrA	N	D94G	4
SAMN07236532	7582	A	G	Rv0006	281	Antibiotic Resistance	gyrA	N	D94G	2
SAMN04633307	7582	A	G	Rv0006	281	Antibiotic Resistance	gyrA	N	D94G	4
SAMN02419608	7582	A	G	Rv0006	281	Antibiotic Resistance	gyrA	N	D94G	2
Peru5420	7582	A	G	Rv0006	281	Antibiotic Resistance	gyrA	N	D94G	4
SAMN08708927	7582	A	G	Rv0006	281	Antibiotic Resistance	gyrA	N	D94G	2
SAMN05806781	7582	A	G	Rv0006	281	Antibiotic Resistance	gyrA	N	D94G	2
SAMEA968152	7582	A	G	Rv0006	281	Antibiotic Resistance	gyrA	N	D94G	2
SAMEA95437918	7582	A	G	Rv0006	281	Antibiotic Resistance	gyrA	N	D94G	2
SAMEA4744280	7582	A	G	Rv0006	281	Antibiotic Resistance	gyrA	N	D94G	4
SAMEA3403347	7582	A	G	Rv0006	281	Antibiotic Resistance	gyrA	N	D94G	4
SAMD00136663	7582	A	G	Rv0006	281	Antibiotic Resistance	gyrA	N	D94G	2
IDR1500006146	7582	A	G	Rv0006	281	Antibiotic Resistance	gyrA	N	D94G	2
SAMN08708517	7582	A	G	Rv0006	281	Antibiotic Resistance	gyrA	N	D94G	2
SAMEA5626287	7582	A	G	Rv0006	281	Antibiotic Resistance	gyrA	N	D94G	3
SAMN10592336	7582	A	G	Rv0006	281	Antibiotic Resistance	gyrA	N	D94G	2
SAMN10448582	7582	A	G	Rv0006	281	Antibiotic Resistance	gyrA	N	D94G	2
SAMN13169677	7582	A	G	Rv0006	281	Antibiotic Resistance	gyrA	N	D94G	2
SAMEA5570074	7582	A	G	Rv0006	281	Antibiotic Resistance	gyrA	N	D94G	4
SAMN08892516	7582	A	G	Rv0006	281	Antibiotic Resistance	gyrA	N	D94G	3
SAMN08613018	7582	A	G	Rv0006	281	Antibiotic Resistance	gyrA	N	D94G	4
SAMEA1707269	7582	A	G	Rv0006	281	Antibiotic Resistance	gyrA	N	D94G	2
SAMEA5626244	7582	A	G	Rv0006	281	Antibiotic Resistance	gyrA	N	D94G	3
SAMEA3139856	7582	A	G	Rv0006	281	Antibiotic Resistance	gyrA	N	D94G	3
IDR1500062818	7582	A	G	Rv0006	281	Antibiotic Resistance	gyrA	N	D94G	2
SAMEA1101452	7582	A	G	Rv0006	281	Antibiotic Resistance	gyrA	N	D94G	3
SAMEA3558632	7582	A	G	Rv0006	281	Antibiotic Resistance	gyrA	N	D94G	2
IDR1400036823	7582	A	G	Rv0006	281	Antibiotic Resistance	gyrA	N	D94G	4
SAMEA3139833	7582	A	G	Rv0006	281	Antibiotic Resistance	gyrA	N	D94G	3
SAMN06209980	7582	A	G	Rv0006	281	Antibiotic Resistance	gyrA	N	D94G	2
SAMN04396870	7582	A	G	Rv0006	281	Antibiotic Resistance	gyrA	N	D94G	3
SAMN02398701	7582	A	G	Rv0006	281	Antibiotic Resistance	gyrA	N	D94G	2
SAMN01908878	7582	A	G	Rv0006	281	Antibiotic Resistance	gyrA	N	D94G	2
SAMEA95417668	7582	A	G	Rv0006	281	Antibiotic Resistance	gyrA	N	D94G	2
SAMN05806759	7582	A	G	Rv0006	281	Antibiotic Resistance	gyrA	N	D94G	2
SAMN02398703	7582	A	G	Rv0006	281	Antibiotic Resistance	gyrA	N	D94G	2
SAMEA1404004	7582	A	G	Rv0006	281	Antibiotic Resistance	gyrA	N	D94G	2
SAMN02419548	7582	A	G	Rv0006	281	Antibiotic Resistance	gyrA	N	D94G	2
SAMEA5626322	7582	A	G	Rv0006	281	Antibiotic Resistance	gyrA	N	D94G	3
SAMN06210086	7582	A	G	Rv0006	281	Antibiotic Resistance	gyrA	N	D94G	4
SAMN06920075	7582	A	G	Rv0006	281	Antibiotic Resistance	gyrA	N	D94G	2
SAMN06142912	7582	A	G	Rv0006	281	Antibiotic Resistance	gyrA	N	D94G	2
SAMD00117772	7582	A	G	Rv0006	281	Antibiotic Resistance	gyrA	N	D94G	2
SAMEA3233427	7582	A	G	Rv0006	281	Antibiotic Resistance	gyrA	N	D94G	2
SAMEA1707298	7582	A	G	Rv0006	281	Antibiotic Resistance	gyrA	N	D94G	2
SAMEA3404126	7582	A	G	Rv0006	281	Antibiotic Resistance	gyrA	N	D94G	4
SAMEA1403749	7582	A	G	Rv0006	281	Antibiotic Resistance	gyrA	N	D94G	2
SAMEA3443164	7582	A	G	Rv0006	281	Antibiotic Resistance	gyrA	N	D94G	3
SAMN07956543	7582	A	G	Rv0006	281	Antibiotic Resistance	gyrA	N	D94G	2
SAMEA1018859	7582	A	G	Rv0006	281	Antibiotic Resistance	gyrA	N	D94G	4
SAMN08708736	7582	A	G	Rv0006	281	Antibiotic Resistance	gyrA	N	D94G	2
SAMN08626066	7582	A	G	Rv0006	281	Antibiotic Resistance	gyrA	N	D94G	2
SAMN08892419	7582	A	G	Rv0006	281	Antibiotic Resistance	gyrA	N	D94G	2
SAMN08626259	7582	A	G	Rv0006	281	Antibiotic Resistance	gyrA	N	D94G	2
SAMEA3340423	7582	A	G	Rv0006	281	Antibiotic Resistance	gyrA	N	D94G	4
SAMEA3139842	7582	A	G	Rv0006	281	Antibiotic Resistance	gyrA	N	D94G	3
SAMN08143531	7582	A	G	Rv0006	281	Antibiotic Resistance	gyrA	N	D94G	2
SAMEA4370634	7582	A	G	Rv0006	281	Antibiotic Resistance	gyrA	N	D94G	2
SAMEA3558612	7582	A	G	Rv0006	281	Antibiotic Resistance	gyrA	N	D94G	2
SAMN08626213	7582	A	G	Rv0006	281	Antibiotic Resistance	gyrA	N	D94G	2
SAMEA95437168	7582	A	G	Rv0006	281	Antibiotic Resistance	gyrA	N	D94G	2
SAMN02419604	7582	A	G	Rv0006	281	Antibiotic Resistance	gyrA	N	D94G	2
SAMN08347734	7582	A	G	Rv0006	281	Antibiotic Resistance	gyrA	N	D94G	2
SAMN07236252	7582	A	G	Rv0006	281	Antibiotic Resistance	gyrA	N	D94G	2
SAMD00117805	7582	A	G	Rv0006	281	Antibiotic Resistance	gyrA	N	D94G	2
SAMEA3921000	7582	A	G	Rv0006	281	Antibiotic Resistance	gyrA	N	D94G	2
SAMN03648286	7582	A	G	Rv0006	281	Antibiotic Resistance	gyrA	N	D94G	4
SAMEA5562528	7582	A	G	Rv0006	281	Antibiotic Resistance	gyrA	N	D94G	2
SAMN09708336	7582	A	G	Rv0006	281	Antibiotic Resistance	gyrA	N	D94G	3
SAMN07236534	7582	A	G	Rv0006	281	Antibiotic Resistance	gyrA	N	D94G	2
SAMN06579034	7582	A	G	Rv0006	281	Antibiotic Resistance	gyrA	N	D94G	3
SAMN04633324	7582	A	G	Rv0006	281	Antibiotic Resistance	gyrA	N	D94G	2
Peru4653	7582	A	G	Rv0006	281	Antibiotic Resistance	gyrA	N	D94G	4
SAMN02360617	7582	A	G	Rv0006	281	Antibiotic Resistance	gyrA	N	D94G	2
SAMN04396882	7582	A	G	Rv0006	281	Antibiotic Resistance	gyrA	N	D94G	3
SAMEA2682687	7582	A	G	Rv0006	281	Antibiotic Resistance	gyrA	N	D94G	2
SAMEA3558143	7582	A	G	Rv0006	281	Antibiotic Resistance	gyrA	N	D94G	1
SAMD00117907	7582	A	G	Rv0006	281	Antibiotic Resistance	gyrA	N	D94G	2
SAMEA1018884	7582	A	G	Rv0006	281	Antibiotic Resistance	gyrA	N	D94G	4
SAMN05001047	7582	A	G	Rv0006	281	Antibiotic Resistance	gyrA	N	D94G	2
SAMN01908811	7582	A	G	Rv0006	281	Antibiotic Resistance	gyrA	N	D94G	2
SAMN03648028	7582	A	G	Rv0006	281	Antibiotic Resistance	gyrA	N	D94G	3
SAMEA1103112	7582	A	G	Rv0006	281	Antibiotic Resistance	gyrA	N	D94G	2
SAMN02398716	7582	A	G	Rv0006	281	Antibiotic Resistance	gyrA	N	D94G	2
SAMN01908852	7582	A	G	Rv0006	281	Antibiotic Resistance	gyrA	N	D94G	2
SAMN03647980	7582	A	G	Rv0006	281	Antibiotic Resistance	gyrA	N	D94G	3
SAMEA1015960	7582	A	G	Rv0006	281	Antibiotic Resistance	gyrA	N	D94G	2
SAMN05001051	7582	A	G	Rv0006	281	Antibiotic Resistance	gyrA	N	D94G	2
SAMEA1101877	7582	A	G	Rv0006	281	Antibiotic Resistance	gyrA	N	D94G	3
SAMN09756334	7582	A	G	Rv0006	281	Antibiotic Resistance	gyrA	N	D94G	2
SAMN01908849	7582	A	G	Rv0006	281	Antibiotic Resistance	gyrA	N	D94G	2
SAMN02585970	7582	A	G	Rv0006	281	Antibiotic Resistance	gyrA	N	D94G	4
SAMN04534871	7582	A	G	Rv0006	281	Antibiotic Resistance	gyrA	N	D94G	2
SAMN04396892	7582	A	G	Rv0006	281	Antibiotic Resistance	gyrA	N	D94G	4
SAMD00117900	7582	A	G	Rv0006	281	Antibiotic Resistance	gyrA	N	D94G	2
Peru4622	7582	A	G	Rv0006	281	Antibiotic Resistance	gyrA	N	D94G	2
SAMEA3139847	7582	A	G	Rv0006	281	Antibiotic Resistance	gyrA	N	D94G	3
SAMEA104614386	7582	A	G	Rv0006	281	Antibiotic Resistance	gyrA	N	D94G	2
SAMEA3139827	7582	A	G	Rv0006	281	Antibiotic Resistance	gyrA	N	D94G	3
SAMEA3432715	7582	A	G	Rv0006	281	Antibiotic Resistance	gyrA	N	D94G	3
SAMN07998979	7582	A	G	Rv0006	281	Antibiotic Resistance	gyrA	N	D94G	2
01R1309	7582	A	G	Rv0006	281	Antibiotic Resistance	gyrA	N	D94G	4
SAMN08347768	7582	A	G	Rv0006	281	Antibiotic Resistance	gyrA	N	D94G	4
SAMN06092145	7582	A	G	Rv0006	281	Antibiotic Resistance	gyrA	N	D94G	2
SAMEA4370632	7582	A	G	Rv0006	281	Antibiotic Resistance	gyrA	N	D94G	2
SAMEA1101768	7582	A	G	Rv0006	281	Antibiotic Resistance	gyrA	N	D94G	3
SAMN08708246	7582	A	G	Rv0006	281	Antibiotic Resistance	gyrA	N	D94G	4
SAMN02419583	7582	A	G	Rv0006	281	Antibiotic Resistance	gyrA	N	D94G	2
SAMN04330052	7582	A	G	Rv0006	281	Antibiotic Resistance	gyrA	N	D94G	2
1479150601544T897115lib5752nextseqn0051151bp	7582	A	G	Rv0006	281	Antibiotic Resistance	gyrA	N	D94G	2
SAMEA3558420	105060	G	A	Rv0095c	156	Non-Essential	Rv0095c	S	D52D	4
SAMN03648673	105060	G	A	Rv0095c	156	Non-Essential	Rv0095c	S	D52D	4
SAMEA5228948	105060	G	A	Rv0095c	156	Non-Essential	Rv0095c	S	D52D	4
SAMN06279772	105060	G	A	Rv0095c	156	Non-Essential	Rv0095c	S	D52D	2
SAMN03649043	105060	G	A	Rv0095c	156	Non-Essential	Rv0095c	S	D52D	4
SAMN08795339	105060	G	A	Rv0095c	156	Non-Essential	Rv0095c	S	D52D	4
SAMEA1119324	105060	G	A	Rv0095c	156	Non-Essential	Rv0095c	S	D52D	3
SAMEA2534278	105060	G	A	Rv0095c	156	Non-Essential	Rv0095c	S	D52D	4
SAMEA1885956	105060	G	A	Rv0095c	156	Non-Essential	Rv0095c	S	D52D	2
SAMEA1101750	105060	G	A	Rv0095c	156	Non-Essential	Rv0095c	S	D52D	3
SAMN08708714	105060	G	A	Rv0095c	156	Non-Essential	Rv0095c	S	D52D	4
SAMEA5626280	105060	G	A	Rv0095c	156	Non-Essential	Rv0095c	S	D52D	3
SAMN06055779	105060	G	A	Rv0095c	156	Non-Essential	Rv0095c	S	D52D	2
SAMEA1119834	105060	G	A	Rv0095c	156	Non-Essential	Rv0095c	S	D52D	3
1841	105060	G	A	Rv0095c	156	Non-Essential	Rv0095c	S	D52D	1
SAMEA3444495	105060	G	A	Rv0095c	156	Non-Essential	Rv0095c	S	D52D	4
SAMD00117848	105060	G	A	Rv0095c	156	Non-Essential	Rv0095c	S	D52D	2
SAMN02584639	105060	G	A	Rv0095c	156	Non-Essential	Rv0095c	S	D52D	4
SAMEA104394539	105060	G	A	Rv0095c	156	Non-Essential	Rv0095c	S	D52D	4
SAMN07766378	105060	G	A	Rv0095c	156	Non-Essential	Rv0095c	S	D52D	2
SAMN10462625	105060	G	A	Rv0095c	156	Non-Essential	Rv0095c	S	D52D	2
SAMEA3671617	105060	G	A	Rv0095c	156	Non-Essential	Rv0095c	S	D52D	4
SAMEA1118623	105060	G	A	Rv0095c	156	Non-Essential	Rv0095c	S	D52D	3
SAMEA1102254	105060	G	A	Rv0095c	156	Non-Essential	Rv0095c	S	D52D	3
SAMN07766246	105060	G	A	Rv0095c	156	Non-Essential	Rv0095c	S	D52D	3
SAMEA104684999	105060	G	A	Rv0095c	156	Non-Essential	Rv0095c	S	D52D	4
SAMN02380998	105060	G	A	Rv0095c	156	Non-Essential	Rv0095c	S	D52D	4
SAMEA3558451	105060	G	A	Rv0095c	156	Non-Essential	Rv0095c	S	D52D	2
SAMEA4798789	105060	G	A	Rv0095c	156	Non-Essential	Rv0095c	S	D52D	4
SAMN03647916	105060	G	A	Rv0095c	156	Non-Essential	Rv0095c	S	D52D	4
SAMN03648046	105060	G	A	Rv0095c	156	Non-Essential	Rv0095c	S	D52D	2
SAMN02584604	105060	G	A	Rv0095c	156	Non-Essential	Rv0095c	S	D52D	4
SAMN06055862	105060	G	A	Rv0095c	156	Non-Essential	Rv0095c	S	D52D	2
SAMEA2535322	105060	G	A	Rv0095c	156	Non-Essential	Rv0095c	S	D52D	4
SAMEA3444514	105060	G	A	Rv0095c	156	Non-Essential	Rv0095c	S	D52D	3
SAMEA104362502	105060	G	A	Rv0095c	156	Non-Essential	Rv0095c	S	D52D	4
SAMEA3558731	105060	G	A	Rv0095c	156	Non-Essential	Rv0095c	S	D52D	4
SAMEA3512721	105060	G	A	Rv0095c	156	Non-Essential	Rv0095c	S	D52D	4
SAMEA3671589	105060	G	A	Rv0095c	156	Non-Essential	Rv0095c	S	D52D	4
SAMEA3558754	105060	G	A	Rv0095c	156	Non-Essential	Rv0095c	S	D52D	4
SAMEA1556846	105060	G	A	Rv0095c	156	Non-Essential	Rv0095c	S	D52D	4
TDR215S192L002	105060	G	A	Rv0095c	156	Non-Essential	Rv0095c	S	D52D	4
SAMN13169459	105060	G	A	Rv0095c	156	Non-Essential	Rv0095c	S	D52D	4
SAMN08215417	105060	G	A	Rv0095c	156	Non-Essential	Rv0095c	S	D52D	3
TDR105S128L002	105060	G	A	Rv0095c	156	Non-Essential	Rv0095c	S	D52D	2
SAMN08629086	105060	G	A	Rv0095c	156	Non-Essential	Rv0095c	S	D52D	1
SAMN03647194	105060	G	A	Rv0095c	156	Non-Essential	Rv0095c	S	D52D	3
SAMN08708525	105060	G	A	Rv0095c	156	Non-Essential	Rv0095c	S	D52D	4
SAMD00117765	105060	G	A	Rv0095c	156	Non-Essential	Rv0095c	S	D52D	2
SAMEA1117968	105060	G	A	Rv0095c	156	Non-Essential	Rv0095c	S	D52D	3
SAMN09100127	105060	G	A	Rv0095c	156	Non-Essential	Rv0095c	S	D52D	3
SAMEA5282477	105060	G	A	Rv0095c	156	Non-Essential	Rv0095c	S	D52D	2
SAMN07658478	105060	G	A	Rv0095c	156	Non-Essential	Rv0095c	S	D52D	3
SAMEA2072272	105060	G	A	Rv0095c	156	Non-Essential	Rv0095c	S	D52D	4
SAMEA1556688	105060	G	A	Rv0095c	156	Non-Essential	Rv0095c	S	D52D	4
SAMN06055445	105060	G	A	Rv0095c	156	Non-Essential	Rv0095c	S	D52D	2
SAMEA3671242	105060	G	A	Rv0095c	156	Non-Essential	Rv0095c	S	D52D	4
SAMEA2591384	105060	G	A	Rv0095c	156	Non-Essential	Rv0095c	S	D52D	3
SAMEA4798659	105060	G	A	Rv0095c	156	Non-Essential	Rv0095c	S	D52D	4
SAMEA1404003	105060	G	A	Rv0095c	156	Non-Essential	Rv0095c	S	D52D	4
SAMEA3374903	105060	G	A	Rv0095c	156	Non-Essential	Rv0095c	S	D52D	4
SAMN06091842	105060	G	A	Rv0095c	156	Non-Essential	Rv0095c	S	D52D	2
SAMEA5282457	105060	G	A	Rv0095c	156	Non-Essential	Rv0095c	S	D52D	4
SAMN03648010	105060	G	A	Rv0095c	156	Non-Essential	Rv0095c	S	D52D	3
SAMN08379939	105060	G	A	Rv0095c	156	Non-Essential	Rv0095c	S	D52D	4
SAMN08215426	105060	G	A	Rv0095c	156	Non-Essential	Rv0095c	S	D52D	3
SAMEA1119619	105060	G	A	Rv0095c	156	Non-Essential	Rv0095c	S	D52D	3
SAMEA1707277	105060	G	A	Rv0095c	156	Non-Essential	Rv0095c	S	D52D	4
SAMEA3421182	105060	G	A	Rv0095c	156	Non-Essential	Rv0095c	S	D52D	3
SAMEA95533918	105060	G	A	Rv0095c	156	Non-Essential	Rv0095c	S	D52D	4
SAMD00117915	105060	G	A	Rv0095c	156	Non-Essential	Rv0095c	S	D52D	2
SAMN07766015	105060	G	A	Rv0095c	156	Non-Essential	Rv0095c	S	D52D	1
SAMN08629348	105060	G	A	Rv0095c	156	Non-Essential	Rv0095c	S	D52D	1
SAMEA1119106	105060	G	A	Rv0095c	156	Non-Essential	Rv0095c	S	D52D	3
SAMEA1118229	105060	G	A	Rv0095c	156	Non-Essential	Rv0095c	S	D52D	3
SAMEA2061808	105060	G	A	Rv0095c	156	Non-Essential	Rv0095c	S	D52D	4
SAMEA1101737	105060	G	A	Rv0095c	156	Non-Essential	Rv0095c	S	D52D	3
SAMN06210009	105060	G	A	Rv0095c	156	Non-Essential	Rv0095c	S	D52D	4
SAMN07658457	105060	G	A	Rv0095c	156	Non-Essential	Rv0095c	S	D52D	1
SAMN06055831	105060	G	A	Rv0095c	156	Non-Essential	Rv0095c	S	D52D	2
SAMD00117934	105060	G	A	Rv0095c	156	Non-Essential	Rv0095c	S	D52D	2
SAMN03647099	105060	G	A	Rv0095c	156	Non-Essential	Rv0095c	S	D52D	3
SAMN08708505	105060	G	A	Rv0095c	156	Non-Essential	Rv0095c	S	D52D	4
SAMEA3139831	105060	G	A	Rv0095c	156	Non-Essential	Rv0095c	S	D52D	1
SAMEA5662677	105060	G	A	Rv0095c	156	Non-Essential	Rv0095c	S	D52D	4
SAMEA2533801	105060	G	A	Rv0095c	156	Non-Essential	Rv0095c	S	D52D	4
SAMEA4798634	105060	G	A	Rv0095c	156	Non-Essential	Rv0095c	S	D52D	4
SAMEA2297001	105060	G	A	Rv0095c	156	Non-Essential	Rv0095c	S	D52D	1
SAMEA1556713	105060	G	A	Rv0095c	156	Non-Essential	Rv0095c	S	D52D	4
SAMEA5626311	105060	G	A	Rv0095c	156	Non-Essential	Rv0095c	S	D52D	3
SAMEA1406135	105060	G	A	Rv0095c	156	Non-Essential	Rv0095c	S	D52D	4
SAMN09100245	105060	G	A	Rv0095c	156	Non-Essential	Rv0095c	S	D52D	4
SAMEA5282463	105060	G	A	Rv0095c	156	Non-Essential	Rv0095c	S	D52D	2
IDR1600031131	105060	G	A	Rv0095c	156	Non-Essential	Rv0095c	S	D52D	2
02R1203	105060	G	A	Rv0095c	156	Non-Essential	Rv0095c	S	D52D	4
SAMN08851393	105060	G	A	Rv0095c	156	Non-Essential	Rv0095c	S	D52D	2
SAMN08892422	105060	G	A	Rv0095c	156	Non-Essential	Rv0095c	S	D52D	3
SAMEA4798919	105060	G	A	Rv0095c	156	Non-Essential	Rv0095c	S	D52D	4
SAMEA3451223	105060	G	A	Rv0095c	156	Non-Essential	Rv0095c	S	D52D	4
SAMN08709196	105060	G	A	Rv0095c	156	Non-Essential	Rv0095c	S	D52D	4
SAMN03647408	105060	G	A	Rv0095c	156	Non-Essential	Rv0095c	S	D52D	3
1479153938227T1379914lib3430nextseqn0004151bp	105060	G	A	Rv0095c	156	Non-Essential	Rv0095c	S	D52D	4
SAMN09099636	105060	G	A	Rv0095c	156	Non-Essential	Rv0095c	S	D52D	3
SAMEA3430668	105060	G	A	Rv0095c	156	Non-Essential	Rv0095c	S	D52D	4
SAMN08912949	105060	G	A	Rv0095c	156	Non-Essential	Rv0095c	S	D52D	4
SAMN07236366	105060	G	A	Rv0095c	156	Non-Essential	Rv0095c	S	D52D	2
SAMN12551554	105060	G	A	Rv0095c	156	Non-Essential	Rv0095c	S	D52D	2
SAMEA4473384	105060	G	A	Rv0095c	156	Non-Essential	Rv0095c	S	D52D	4
SAMN08732593	105060	G	A	Rv0095c	156	Non-Essential	Rv0095c	S	D52D	2
1479151773189T1378114lib3412nextseqn0004151bp	105060	G	A	Rv0095c	156	Non-Essential	Rv0095c	S	D52D	4
SAMEA4798857	105060	G	A	Rv0095c	156	Non-Essential	Rv0095c	S	D52D	4
SAMN13169455	105060	G	A	Rv0095c	156	Non-Essential	Rv0095c	S	D52D	4
SAMEA5282367	105060	G	A	Rv0095c	156	Non-Essential	Rv0095c	S	D52D	1
SAMEA1101788	105060	G	A	Rv0095c	156	Non-Essential	Rv0095c	S	D52D	3
SAMN09100205	105060	G	A	Rv0095c	156	Non-Essential	Rv0095c	S	D52D	1
SAMEA5329276	105060	G	A	Rv0095c	156	Non-Essential	Rv0095c	S	D52D	2
SAMEA3139819	105060	G	A	Rv0095c	156	Non-Essential	Rv0095c	S	D52D	3
SAMEA4041372	105060	G	A	Rv0095c	156	Non-Essential	Rv0095c	S	D52D	4
SAMEA1102256	105060	G	A	Rv0095c	156	Non-Essential	Rv0095c	S	D52D	3
SAMN04633329	105060	G	A	Rv0095c	156	Non-Essential	Rv0095c	S	D52D	4
SAMN08214914	105060	G	A	Rv0095c	156	Non-Essential	Rv0095c	S	D52D	4
SAMEA1119900	105060	G	A	Rv0095c	156	Non-Essential	Rv0095c	S	D52D	1
SAMEA1118008	105060	G	A	Rv0095c	156	Non-Essential	Rv0095c	S	D52D	3
SAMEA2072269	105060	G	A	Rv0095c	156	Non-Essential	Rv0095c	S	D52D	4
SAMN03647623	105060	G	A	Rv0095c	156	Non-Essential	Rv0095c	S	D52D	3
SAMEA3446428	105060	G	A	Rv0095c	156	Non-Essential	Rv0095c	S	D52D	3
SAMN07766476	105060	G	A	Rv0095c	156	Non-Essential	Rv0095c	S	D52D	2
SAMEA3402873	105060	G	A	Rv0095c	156	Non-Essential	Rv0095c	S	D52D	4
SAMEA2710949	105060	G	A	Rv0095c	156	Non-Essential	Rv0095c	S	D52D	4
SAMEA1118761	105060	G	A	Rv0095c	156	Non-Essential	Rv0095c	S	D52D	3
SAMN06578970	105060	G	A	Rv0095c	156	Non-Essential	Rv0095c	S	D52D	3
SAMEA3448208	105060	G	A	Rv0095c	156	Non-Essential	Rv0095c	S	D52D	3
SAMEA1397493	105060	G	A	Rv0095c	156	Non-Essential	Rv0095c	S	D52D	3
SAMEA2783521	105060	G	A	Rv0095c	156	Non-Essential	Rv0095c	S	D52D	4
SAMN03647404	105060	G	A	Rv0095c	156	Non-Essential	Rv0095c	S	D52D	1
SAMEA1101746	105060	G	A	Rv0095c	156	Non-Essential	Rv0095c	S	D52D	1
SAMEA3446743	105060	G	A	Rv0095c	156	Non-Essential	Rv0095c	S	D52D	4
SAMEA1904657	105060	G	A	Rv0095c	156	Non-Essential	Rv0095c	S	D52D	3
Peru4952	105060	G	A	Rv0095c	156	Non-Essential	Rv0095c	S	D52D	4
SAMN13169733	105060	G	A	Rv0095c	156	Non-Essential	Rv0095c	S	D52D	4
SAMN04396841	105060	G	A	Rv0095c	156	Non-Essential	Rv0095c	S	D52D	3
SAMEA4888761	105060	G	A	Rv0095c	156	Non-Essential	Rv0095c	S	D52D	4
SAMN07658508	105060	G	A	Rv0095c	156	Non-Essential	Rv0095c	S	D52D	3
TDR57S91L002	105060	G	A	Rv0095c	156	Non-Essential	Rv0095c	S	D52D	4
SAMEA4041347	105060	G	A	Rv0095c	156	Non-Essential	Rv0095c	S	D52D	4
SAMEA2783261	105060	G	A	Rv0095c	156	Non-Essential	Rv0095c	S	D52D	4
SAMEA2533545	105060	G	A	Rv0095c	156	Non-Essential	Rv0095c	S	D52D	3
SAMN08795067	105060	G	A	Rv0095c	156	Non-Essential	Rv0095c	S	D52D	4
SAMN07658161	105060	G	A	Rv0095c	156	Non-Essential	Rv0095c	S	D52D	3
SAMEA961657	105060	G	A	Rv0095c	156	Non-Essential	Rv0095c	S	D52D	3
SAMEA1118490	105060	G	A	Rv0095c	156	Non-Essential	Rv0095c	S	D52D	4
SAMEA2533797	105060	G	A	Rv0095c	156	Non-Essential	Rv0095c	S	D52D	4
SAMEA1403630	105060	G	A	Rv0095c	156	Non-Essential	Rv0095c	S	D52D	4
SAMD00117836	105060	G	A	Rv0095c	156	Non-Essential	Rv0095c	S	D52D	2
SAMN08215193	105060	G	A	Rv0095c	156	Non-Essential	Rv0095c	S	D52D	2
IDR1500071802	105060	G	A	Rv0095c	156	Non-Essential	Rv0095c	S	D52D	2
SAMEA1485412	105060	G	A	Rv0095c	156	Non-Essential	Rv0095c	S	D52D	4
TDR59S114L002	105060	G	A	Rv0095c	156	Non-Essential	Rv0095c	S	D52D	4
SAMN08636969	105060	G	A	Rv0095c	156	Non-Essential	Rv0095c	S	D52D	4
SAMN08214858	105060	G	A	Rv0095c	156	Non-Essential	Rv0095c	S	D52D	2
SAMEA4798630	105060	G	A	Rv0095c	156	Non-Essential	Rv0095c	S	D52D	4
SAMN04522051	105060	G	A	Rv0095c	156	Non-Essential	Rv0095c	S	D52D	4
IDR1500066192	105060	G	A	Rv0095c	156	Non-Essential	Rv0095c	S	D52D	3
SAMEA2534657	105060	G	A	Rv0095c	156	Non-Essential	Rv0095c	S	D52D	3
SAMEA3558790	105060	G	A	Rv0095c	156	Non-Essential	Rv0095c	S	D52D	4
SAMEA1707452	105060	G	A	Rv0095c	156	Non-Essential	Rv0095c	S	D52D	4
SAMN07766156	105060	G	A	Rv0095c	156	Non-Essential	Rv0095c	S	D52D	2
SAMEA1485221	105060	G	A	Rv0095c	156	Non-Essential	Rv0095c	S	D52D	4
SAMN12551179	105060	G	A	Rv0095c	156	Non-Essential	Rv0095c	S	D52D	2
SAMN04396828	105060	G	A	Rv0095c	156	Non-Essential	Rv0095c	S	D52D	1
SAMN08626266	105060	G	A	Rv0095c	156	Non-Essential	Rv0095c	S	D52D	2
SAMD00117880	105060	G	A	Rv0095c	156	Non-Essential	Rv0095c	S	D52D	2
SAMEA3558737	105060	G	A	Rv0095c	156	Non-Essential	Rv0095c	S	D52D	4
SAMEA104394494	105060	G	A	Rv0095c	156	Non-Essential	Rv0095c	S	D52D	4
SAMEA1119053	105060	G	A	Rv0095c	156	Non-Essential	Rv0095c	S	D52D	3
SAMN09685351	105060	G	A	Rv0095c	156	Non-Essential	Rv0095c	S	D52D	4
SAMEA1117775	105060	G	A	Rv0095c	156	Non-Essential	Rv0095c	S	D52D	3
SAMN03647474	105060	G	A	Rv0095c	156	Non-Essential	Rv0095c	S	D52D	1
SAMEA3671512	105060	G	A	Rv0095c	156	Non-Essential	Rv0095c	S	D52D	4
SAMEA1405911	105060	G	A	Rv0095c	156	Non-Essential	Rv0095c	S	D52D	3
SAMEA1569124	105060	G	A	Rv0095c	156	Non-Essential	Rv0095c	S	D52D	4
SAMN03647420	105060	G	A	Rv0095c	156	Non-Essential	Rv0095c	S	D52D	3
SAMN02599169	105060	G	A	Rv0095c	156	Non-Essential	Rv0095c	S	D52D	1
SAMN08892513	105060	G	A	Rv0095c	156	Non-Essential	Rv0095c	S	D52D	3
SAMEA1119812	105060	G	A	Rv0095c	156	Non-Essential	Rv0095c	S	D52D	4
SAMEA1101516	105060	G	A	Rv0095c	156	Non-Essential	Rv0095c	S	D52D	3
SAMEA2079045	105060	G	A	Rv0095c	156	Non-Essential	Rv0095c	S	D52D	3
SAMN07344634	105060	G	A	Rv0095c	156	Non-Essential	Rv0095c	S	D52D	4
SAMEA2534293	105060	G	A	Rv0095c	156	Non-Essential	Rv0095c	S	D52D	4
SAMEA1929783	105060	G	A	Rv0095c	156	Non-Essential	Rv0095c	S	D52D	3
SAMEA1119346	105060	G	A	Rv0095c	156	Non-Essential	Rv0095c	S	D52D	4
SAMN07766425	105060	G	A	Rv0095c	156	Non-Essential	Rv0095c	S	D52D	3
SAMN08629398	105060	G	A	Rv0095c	156	Non-Essential	Rv0095c	S	D52D	1
TDR43S166L002	105060	G	A	Rv0095c	156	Non-Essential	Rv0095c	S	D52D	1
SAMEA2534502	105060	G	A	Rv0095c	156	Non-Essential	Rv0095c	S	D52D	3
SAMEA4744359	105060	G	A	Rv0095c	156	Non-Essential	Rv0095c	S	D52D	4
SAMN03648043	105060	G	A	Rv0095c	156	Non-Essential	Rv0095c	S	D52D	2
SAMEA104394500	105060	G	A	Rv0095c	156	Non-Essential	Rv0095c	S	D52D	4
02R1589	105060	G	A	Rv0095c	156	Non-Essential	Rv0095c	S	D52D	4
SAMEA3139853	105060	G	A	Rv0095c	156	Non-Essential	Rv0095c	S	D52D	1
SAMN07766384	105060	G	A	Rv0095c	156	Non-Essential	Rv0095c	S	D52D	2
SAMEA5282508	105060	G	A	Rv0095c	156	Non-Essential	Rv0095c	S	D52D	4
SAMN06055413	105060	G	A	Rv0095c	156	Non-Essential	Rv0095c	S	D52D	2
SAMN04396846	105060	G	A	Rv0095c	156	Non-Essential	Rv0095c	S	D52D	1
SAMN06209971	105060	G	A	Rv0095c	156	Non-Essential	Rv0095c	S	D52D	4
SAMN05276402	105060	G	A	Rv0095c	156	Non-Essential	Rv0095c	S	D52D	4
SAMN06092000	105060	G	A	Rv0095c	156	Non-Essential	Rv0095c	S	D52D	4
SAMN06055555	105060	G	A	Rv0095c	156	Non-Essential	Rv0095c	S	D52D	2
SAMEA1118165	105060	G	A	Rv0095c	156	Non-Essential	Rv0095c	S	D52D	1
SAMEA1101733	105060	G	A	Rv0095c	156	Non-Essential	Rv0095c	S	D52D	3
SAMN08709095	105060	G	A	Rv0095c	156	Non-Essential	Rv0095c	S	D52D	4
SAMEA2783007	105060	G	A	Rv0095c	156	Non-Essential	Rv0095c	S	D52D	1
SAMN08892421	105060	G	A	Rv0095c	156	Non-Essential	Rv0095c	S	D52D	3
SAMN08708532	105060	G	A	Rv0095c	156	Non-Essential	Rv0095c	S	D52D	4
SAMEA1405958	105060	G	A	Rv0095c	156	Non-Essential	Rv0095c	S	D52D	1
SAMN07998952	105060	G	A	Rv0095c	156	Non-Essential	Rv0095c	S	D52D	2
SAMEA2682840	105060	G	A	Rv0095c	156	Non-Essential	Rv0095c	S	D52D	4
SAMEA2683054	105060	G	A	Rv0095c	156	Non-Essential	Rv0095c	S	D52D	4
SAMEA3562788	105060	G	A	Rv0095c	156	Non-Essential	Rv0095c	S	D52D	4
SAMN08629389	105060	G	A	Rv0095c	156	Non-Essential	Rv0095c	S	D52D	3
SAMEA2534668	105060	G	A	Rv0095c	156	Non-Essential	Rv0095c	S	D52D	4
SAMEA3233424	105060	G	A	Rv0095c	156	Non-Essential	Rv0095c	S	D52D	2
SAMEA5542169	105060	G	A	Rv0095c	156	Non-Essential	Rv0095c	S	D52D	4
SAMEA1102221	105060	G	A	Rv0095c	156	Non-Essential	Rv0095c	S	D52D	3
TDR52S211L002	105060	G	A	Rv0095c	156	Non-Essential	Rv0095c	S	D52D	4
SAMEA3447630	105060	G	A	Rv0095c	156	Non-Essential	Rv0095c	S	D52D	4
SAMEA3420858	105060	G	A	Rv0095c	156	Non-Essential	Rv0095c	S	D52D	4
SAMEA1118349	105060	G	A	Rv0095c	156	Non-Essential	Rv0095c	S	D52D	4
SAMN02599051	105060	G	A	Rv0095c	156	Non-Essential	Rv0095c	S	D52D	1
SAMEA5056367	105060	G	A	Rv0095c	156	Non-Essential	Rv0095c	S	D52D	4
SAMN08214937	105060	G	A	Rv0095c	156	Non-Essential	Rv0095c	S	D52D	4
Peru3022	105060	G	A	Rv0095c	156	Non-Essential	Rv0095c	S	D52D	2
SAMEA1707833	105060	G	A	Rv0095c	156	Non-Essential	Rv0095c	S	D52D	6
SAMN08637013	105060	G	A	Rv0095c	156	Non-Essential	Rv0095c	S	D52D	4
SAMN10663290	105060	G	A	Rv0095c	156	Non-Essential	Rv0095c	S	D52D	1
SAMN07660040	105060	G	A	Rv0095c	156	Non-Essential	Rv0095c	S	D52D	3
SAMN02414892	105060	G	A	Rv0095c	156	Non-Essential	Rv0095c	S	D52D	4
SAMN07766454	105060	G	A	Rv0095c	156	Non-Essential	Rv0095c	S	D52D	4
SAMD00117858	105060	G	A	Rv0095c	156	Non-Essential	Rv0095c	S	D52D	4
SAMN02599107	105060	G	A	Rv0095c	156	Non-Essential	Rv0095c	S	D52D	1
SAMEA3432971	105060	G	A	Rv0095c	156	Non-Essential	Rv0095c	S	D52D	3
IDR1600011061	105060	G	A	Rv0095c	156	Non-Essential	Rv0095c	S	D52D	2
SAMEA4798723	105060	G	A	Rv0095c	156	Non-Essential	Rv0095c	S	D52D	4
SAMEA3443194	105060	G	A	Rv0095c	156	Non-Essential	Rv0095c	S	D52D	2
SAMEA5282432	105060	G	A	Rv0095c	156	Non-Essential	Rv0095c	S	D52D	2
SAMEA1117642	105060	G	A	Rv0095c	156	Non-Essential	Rv0095c	S	D52D	3
SAMEA3558830	105060	G	A	Rv0095c	156	Non-Essential	Rv0095c	S	D52D	4
SAMN06210068	105060	G	A	Rv0095c	156	Non-Essential	Rv0095c	S	D52D	4
SAMEA5076079	105060	G	A	Rv0095c	156	Non-Essential	Rv0095c	S	D52D	4
SAMN06092102	105060	G	A	Rv0095c	156	Non-Essential	Rv0095c	S	D52D	2
SAMEA1397315	105060	G	A	Rv0095c	156	Non-Essential	Rv0095c	S	D52D	3
SAMN03647398	105060	G	A	Rv0095c	156	Non-Essential	Rv0095c	S	D52D	3
SAMEA3139822	105060	G	A	Rv0095c	156	Non-Essential	Rv0095c	S	D52D	3
SAMEA5157190	105060	G	A	Rv0095c	156	Non-Essential	Rv0095c	S	D52D	4
SAMEA1707855	105060	G	A	Rv0095c	156	Non-Essential	Rv0095c	S	D52D	3
SAMEA5190475	105060	G	A	Rv0095c	156	Non-Essential	Rv0095c	S	D52D	4
SAMN06579096	105060	G	A	Rv0095c	156	Non-Essential	Rv0095c	S	D52D	3
SAMN08913308	105060	G	A	Rv0095c	156	Non-Essential	Rv0095c	S	D52D	4
SAMN06579059	105060	G	A	Rv0095c	156	Non-Essential	Rv0095c	S	D52D	3
SAMEA1119539	105060	G	A	Rv0095c	156	Non-Essential	Rv0095c	S	D52D	3
SAMEA5076162	105060	G	A	Rv0095c	156	Non-Essential	Rv0095c	S	D52D	4
SAMEA3360014	105060	G	A	Rv0095c	156	Non-Essential	Rv0095c	S	D52D	4
SAMN07236397	105060	G	A	Rv0095c	156	Non-Essential	Rv0095c	S	D52D	4
SAMEA1118388	105060	G	A	Rv0095c	156	Non-Essential	Rv0095c	S	D52D	3
SAMEA3558803	105060	G	A	Rv0095c	156	Non-Essential	Rv0095c	S	D52D	4
SAMD00029509	105060	G	A	Rv0095c	156	Non-Essential	Rv0095c	S	D52D	2
SAMN04633276	105060	G	A	Rv0095c	156	Non-Essential	Rv0095c	S	D52D	4
SAMN02360575	105060	G	A	Rv0095c	156	Non-Essential	Rv0095c	S	D52D	2
SAMEA3234139	105060	G	A	Rv0095c	156	Non-Essential	Rv0095c	S	D52D	4
SAMN03648017	105060	G	A	Rv0095c	156	Non-Essential	Rv0095c	S	D52D	4
SAMN06579149	105060	G	A	Rv0095c	156	Non-Essential	Rv0095c	S	D52D	1
SAMEA3671400	105060	G	A	Rv0095c	156	Non-Essential	Rv0095c	S	D52D	4
SAMN09100219	105060	G	A	Rv0095c	156	Non-Essential	Rv0095c	S	D52D	3
SAMEA1118351	105060	G	A	Rv0095c	156	Non-Essential	Rv0095c	S	D52D	4
SAMN03648234	105060	G	A	Rv0095c	156	Non-Essential	Rv0095c	S	D52D	3
SAMEA1569314	105060	G	A	Rv0095c	156	Non-Essential	Rv0095c	S	D52D	4
SAMEA1102223	105060	G	A	Rv0095c	156	Non-Essential	Rv0095c	S	D52D	3
SAMD00117888	105060	G	A	Rv0095c	156	Non-Essential	Rv0095c	S	D52D	2
SAMN03647715	105060	G	A	Rv0095c	156	Non-Essential	Rv0095c	S	D52D	1
SAMEA1119404	105060	G	A	Rv0095c	156	Non-Essential	Rv0095c	S	D52D	3
SAMEA5282374	105060	G	A	Rv0095c	156	Non-Essential	Rv0095c	S	D52D	1
SAMEA5056396	105060	G	A	Rv0095c	156	Non-Essential	Rv0095c	S	D52D	4
SAMEA4798846	105060	G	A	Rv0095c	156	Non-Essential	Rv0095c	S	D52D	4
SAMEA2710763	105060	G	A	Rv0095c	156	Non-Essential	Rv0095c	S	D52D	4
SAMEA4798889	105060	G	A	Rv0095c	156	Non-Essential	Rv0095c	S	D52D	4
SAMEA1117833	105060	G	A	Rv0095c	156	Non-Essential	Rv0095c	S	D52D	4
03R0070	105060	G	A	Rv0095c	156	Non-Essential	Rv0095c	S	D52D	4
SAMEA1119484	105060	G	A	Rv0095c	156	Non-Essential	Rv0095c	S	D52D	1
SAMN08214861	105060	G	A	Rv0095c	156	Non-Essential	Rv0095c	S	D52D	3
SAMEA1101884	105060	G	A	Rv0095c	156	Non-Essential	Rv0095c	S	D52D	3
SAMEA1406141	105060	G	A	Rv0095c	156	Non-Essential	Rv0095c	S	D52D	3
SAMN09756106	105060	G	A	Rv0095c	156	Non-Essential	Rv0095c	S	D52D	4
SAMEA4798772	105060	G	A	Rv0095c	156	Non-Essential	Rv0095c	S	D52D	4
SAMEA1118649	105060	G	A	Rv0095c	156	Non-Essential	Rv0095c	S	D52D	3
SAMN08912730	105060	G	A	Rv0095c	156	Non-Essential	Rv0095c	S	D52D	4
SAMN07766417	105060	G	A	Rv0095c	156	Non-Essential	Rv0095c	S	D52D	3
SAMN03647961	105060	G	A	Rv0095c	156	Non-Essential	Rv0095c	S	D52D	1
SAMEA1119810	105060	G	A	Rv0095c	156	Non-Essential	Rv0095c	S	D52D	1
SAMEA4473402	105060	G	A	Rv0095c	156	Non-Essential	Rv0095c	S	D52D	4
SAMN12551492	105060	G	A	Rv0095c	156	Non-Essential	Rv0095c	S	D52D	2
SAMEA3558788	105060	G	A	Rv0095c	156	Non-Essential	Rv0095c	S	D52D	4
SAMN06092569	105060	G	A	Rv0095c	156	Non-Essential	Rv0095c	S	D52D	2
SAMEA2062270	105060	G	A	Rv0095c	156	Non-Essential	Rv0095c	S	D52D	4
SAMN08795193	105060	G	A	Rv0095c	156	Non-Essential	Rv0095c	S	D52D	2
SAMEA2297124	105060	G	A	Rv0095c	156	Non-Essential	Rv0095c	S	D52D	4
SAMN09090351	105060	G	A	Rv0095c	156	Non-Essential	Rv0095c	S	D52D	1
SAMN07978244	105060	G	A	Rv0095c	156	Non-Essential	Rv0095c	S	D52D	3
SAMN08379856	105060	G	A	Rv0095c	156	Non-Essential	Rv0095c	S	D52D	4
SAMD00117809	105060	G	A	Rv0095c	156	Non-Essential	Rv0095c	S	D52D	2
TDR151S117L002	105060	G	A	Rv0095c	156	Non-Essential	Rv0095c	S	D52D	4
SAMEA3671423	105060	G	A	Rv0095c	156	Non-Essential	Rv0095c	S	D52D	4
SAMN09099869	105060	G	A	Rv0095c	156	Non-Essential	Rv0095c	S	D52D	3
SAMN07660272	105060	G	A	Rv0095c	156	Non-Essential	Rv0095c	S	D52D	3
M0012253-2	105060	G	A	Rv0095c	156	Non-Essential	Rv0095c	S	D52D	4
SAMEA1707836	105060	G	A	Rv0095c	156	Non-Essential	Rv0095c	S	D52D	4
SAMEA4798906	105060	G	A	Rv0095c	156	Non-Essential	Rv0095c	S	D52D	4
SAMEA3558727	105060	G	A	Rv0095c	156	Non-Essential	Rv0095c	S	D52D	4
SAMEA2534864	105060	G	A	Rv0095c	156	Non-Essential	Rv0095c	S	D52D	4
SAMEA4473403	105060	G	A	Rv0095c	156	Non-Essential	Rv0095c	S	D52D	4
SAMN09708360	105060	G	A	Rv0095c	156	Non-Essential	Rv0095c	S	D52D	3
SAMN09100464	105060	G	A	Rv0095c	156	Non-Essential	Rv0095c	S	D52D	1
SAMN06210097	105060	G	A	Rv0095c	156	Non-Essential	Rv0095c	S	D52D	4
SAMN13169550	105060	G	A	Rv0095c	156	Non-Essential	Rv0095c	S	D52D	4
SAMEA3451144	105060	G	A	Rv0095c	156	Non-Essential	Rv0095c	S	D52D	4
SAMEA4798806	105060	G	A	Rv0095c	156	Non-Essential	Rv0095c	S	D52D	4
SAMEA1569227	105060	G	A	Rv0095c	156	Non-Essential	Rv0095c	S	D52D	4
SAMEA1119470	105060	G	A	Rv0095c	156	Non-Essential	Rv0095c	S	D52D	3
SAMEA3715411	105060	G	A	Rv0095c	156	Non-Essential	Rv0095c	S	D52D	4
SAMEA1485461	105060	G	A	Rv0095c	156	Non-Essential	Rv0095c	S	D52D	4
SAMEA1102260	105060	G	A	Rv0095c	156	Non-Essential	Rv0095c	S	D52D	3
SAMN08383203	105060	G	A	Rv0095c	156	Non-Essential	Rv0095c	S	D52D	4
SAMD00029418	105060	G	A	Rv0095c	156	Non-Essential	Rv0095c	S	D52D	2
SAMN07766188	105060	G	A	Rv0095c	156	Non-Essential	Rv0095c	S	D52D	2
SAMN08892486	105060	G	A	Rv0095c	156	Non-Essential	Rv0095c	S	D52D	3
SAMN07658595	105060	G	A	Rv0095c	156	Non-Essential	Rv0095c	S	D52D	1
SAMN09951372	105060	G	A	Rv0095c	156	Non-Essential	Rv0095c	S	D52D	4
SAMEA2534540	105060	G	A	Rv0095c	156	Non-Essential	Rv0095c	S	D52D	4
SAMEA1015931	105060	G	A	Rv0095c	156	Non-Essential	Rv0095c	S	D52D	4
SAMN08379975	105060	G	A	Rv0095c	156	Non-Essential	Rv0095c	S	D52D	2
SAMN08892432	105060	G	A	Rv0095c	156	Non-Essential	Rv0095c	S	D52D	3
SAMN10462628	105060	G	A	Rv0095c	156	Non-Essential	Rv0095c	S	D52D	2
SAMEA3447644	105060	G	A	Rv0095c	156	Non-Essential	Rv0095c	S	D52D	4
SAMN09102391	105060	G	A	Rv0095c	156	Non-Essential	Rv0095c	S	D52D	3
SAMEA3367545	105060	G	A	Rv0095c	156	Non-Essential	Rv0095c	S	D52D	4
SAMEA3562774	105060	G	A	Rv0095c	156	Non-Essential	Rv0095c	S	D52D	4
SAMEA1101604	105060	G	A	Rv0095c	156	Non-Essential	Rv0095c	S	D52D	3
SAMEA2534308	105060	G	A	Rv0095c	156	Non-Essential	Rv0095c	S	D52D	4
SAMEA3671365	105060	G	A	Rv0095c	156	Non-Essential	Rv0095c	S	D52D	4
SAMEA1102560	105060	G	A	Rv0095c	156	Non-Essential	Rv0095c	S	D52D	4
SAMN03648818	105060	G	A	Rv0095c	156	Non-Essential	Rv0095c	S	D52D	4
SAMN08379735	105060	G	A	Rv0095c	156	Non-Essential	Rv0095c	S	D52D	4
SAMN02567730	105060	G	A	Rv0095c	156	Non-Essential	Rv0095c	S	D52D	4
SAMEA3505324	105060	G	A	Rv0095c	156	Non-Essential	Rv0095c	S	D52D	4
SAMN08436058	105060	G	A	Rv0095c	156	Non-Essential	Rv0095c	S	D52D	1
SAMEA104708029	105060	G	A	Rv0095c	156	Non-Essential	Rv0095c	S	D52D	2
SAMEA4744284	105060	G	A	Rv0095c	156	Non-Essential	Rv0095c	S	D52D	4
SAMEA2534463	105060	G	A	Rv0095c	156	Non-Essential	Rv0095c	S	D52D	4
SAMN03648882	105060	G	A	Rv0095c	156	Non-Essential	Rv0095c	S	D52D	4
SAMN03648460	105060	G	A	Rv0095c	156	Non-Essential	Rv0095c	S	D52D	3
SAMEA1119037	105060	G	A	Rv0095c	156	Non-Essential	Rv0095c	S	D52D	3
SAMEA3671519	105060	G	A	Rv0095c	156	Non-Essential	Rv0095c	S	D52D	4
SAMEA1119519	105060	G	A	Rv0095c	156	Non-Essential	Rv0095c	S	D52D	3
SAMN06092187	105060	G	A	Rv0095c	156	Non-Essential	Rv0095c	S	D52D	2
SAMEA3432853	105060	G	A	Rv0095c	156	Non-Essential	Rv0095c	S	D52D	1
SAMN08612805	105060	G	A	Rv0095c	156	Non-Essential	Rv0095c	S	D52D	4
SAMEA1530713	105060	G	A	Rv0095c	156	Non-Essential	Rv0095c	S	D52D	4
SAMEA3446555	105060	G	A	Rv0095c	156	Non-Essential	Rv0095c	S	D52D	3
Peru4915	105060	G	A	Rv0095c	156	Non-Essential	Rv0095c	S	D52D	4
SAMN08851394	105060	G	A	Rv0095c	156	Non-Essential	Rv0095c	S	D52D	4
SAMEA3421008	105060	G	A	Rv0095c	156	Non-Essential	Rv0095c	S	D52D	4
SAMEA1101502	105060	G	A	Rv0095c	156	Non-Essential	Rv0095c	S	D52D	3
SAMEA2534660	105060	G	A	Rv0095c	156	Non-Essential	Rv0095c	S	D52D	4
Peru4614	105060	G	A	Rv0095c	156	Non-Essential	Rv0095c	S	D52D	4
SAMN02381013	105060	G	A	Rv0095c	156	Non-Essential	Rv0095c	S	D52D	3
SAMN03648775	105060	G	A	Rv0095c	156	Non-Essential	Rv0095c	S	D52D	3
SAMEA1530857	105060	G	A	Rv0095c	156	Non-Essential	Rv0095c	S	D52D	4
SAMEA1118041	105060	G	A	Rv0095c	156	Non-Essential	Rv0095c	S	D52D	3
SAMEA1119547	105060	G	A	Rv0095c	156	Non-Essential	Rv0095c	S	D52D	3
SAMEA1403653	105060	G	A	Rv0095c	156	Non-Essential	Rv0095c	S	D52D	4
SAMEA3446535	105060	G	A	Rv0095c	156	Non-Essential	Rv0095c	S	D52D	4
SAMEA1877278	105060	G	A	Rv0095c	156	Non-Essential	Rv0095c	S	D52D	4
SAMN02584637	105060	G	A	Rv0095c	156	Non-Essential	Rv0095c	S	D52D	4
SAMEA1485231	105060	G	A	Rv0095c	156	Non-Essential	Rv0095c	S	D52D	4
IDR1600025432	105060	G	A	Rv0095c	156	Non-Essential	Rv0095c	S	D52D	1
SAMN03648614	105060	G	A	Rv0095c	156	Non-Essential	Rv0095c	S	D52D	4
SAMEA4744342	105060	G	A	Rv0095c	156	Non-Essential	Rv0095c	S	D52D	4
SAMEA1119814	105060	G	A	Rv0095c	156	Non-Essential	Rv0095c	S	D52D	4
SAMN02381026	105060	G	A	Rv0095c	156	Non-Essential	Rv0095c	S	D52D	2
SAMN06055737	105060	G	A	Rv0095c	156	Non-Essential	Rv0095c	S	D52D	2
SAMD00029473	105060	G	A	Rv0095c	156	Non-Essential	Rv0095c	S	D52D	2
IDR1600041577	105060	G	A	Rv0095c	156	Non-Essential	Rv0095c	S	D52D	3
SAMEA5282329	105060	G	A	Rv0095c	156	Non-Essential	Rv0095c	S	D52D	2
Peru4459	105060	G	A	Rv0095c	156	Non-Essential	Rv0095c	S	D52D	4
SAMEA1101721	105060	G	A	Rv0095c	156	Non-Essential	Rv0095c	S	D52D	3
SAMN06579067	105060	G	A	Rv0095c	156	Non-Essential	Rv0095c	S	D52D	3
IDR1600006792	105060	G	A	Rv0095c	156	Non-Essential	Rv0095c	S	D52D	3
SAMEA1117953	105060	G	A	Rv0095c	156	Non-Essential	Rv0095c	S	D52D	3
SAMN08629133	105060	G	A	Rv0095c	156	Non-Essential	Rv0095c	S	D52D	1
SAMN07766335	105060	G	A	Rv0095c	156	Non-Essential	Rv0095c	S	D52D	2
SAMD00029550	105060	G	A	Rv0095c	156	Non-Essential	Rv0095c	S	D52D	2
SAMEA3445012	105060	G	A	Rv0095c	156	Non-Essential	Rv0095c	S	D52D	4
SAMEA3558419	105060	G	A	Rv0095c	156	Non-Essential	Rv0095c	S	D52D	4
SAMN07766154	105060	G	A	Rv0095c	156	Non-Essential	Rv0095c	S	D52D	3
SAMN08892426	105060	G	A	Rv0095c	156	Non-Essential	Rv0095c	S	D52D	3
SAMEA1119371	105060	G	A	Rv0095c	156	Non-Essential	Rv0095c	S	D52D	1
SAMEA961619	105060	G	A	Rv0095c	156	Non-Essential	Rv0095c	S	D52D	3
SAMN03648233	105060	G	A	Rv0095c	156	Non-Essential	Rv0095c	S	D52D	3
Peru5088	105060	G	A	Rv0095c	156	Non-Essential	Rv0095c	S	D52D	2
SAMN04633295	105060	G	A	Rv0095c	156	Non-Essential	Rv0095c	S	D52D	4
SAMEA3671350	105060	G	A	Rv0095c	156	Non-Essential	Rv0095c	S	D52D	4
SAMEA1485482	105060	G	A	Rv0095c	156	Non-Essential	Rv0095c	S	D52D	4
SAMEA5569855	105060	G	A	Rv0095c	156	Non-Essential	Rv0095c	S	D52D	4
SAMN02599132	105060	G	A	Rv0095c	156	Non-Essential	Rv0095c	S	D52D	1
SAMEA5056354	105060	G	A	Rv0095c	156	Non-Essential	Rv0095c	S	D52D	4
SAMEA104304836	105060	G	A	Rv0095c	156	Non-Essential	Rv0095c	S	D52D	4
SAMN08214893	105060	G	A	Rv0095c	156	Non-Essential	Rv0095c	S	D52D	3
SAMEA2399495	105060	G	A	Rv0095c	156	Non-Essential	Rv0095c	S	D52D	5
1479144119992T178115lib4986nextseqn0035151bp	105060	G	A	Rv0095c	156	Non-Essential	Rv0095c	S	D52D	2
SAMEA3400985	105060	G	A	Rv0095c	156	Non-Essential	Rv0095c	S	D52D	1
SAMEA2533683	105060	G	A	Rv0095c	156	Non-Essential	Rv0095c	S	D52D	4
SAMN06055466	105060	G	A	Rv0095c	156	Non-Essential	Rv0095c	S	D52D	2
SAMEA104153384	105060	G	A	Rv0095c	156	Non-Essential	Rv0095c	S	D52D	1
SAMEA1118335	105060	G	A	Rv0095c	156	Non-Essential	Rv0095c	S	D52D	2
SAMEA1119649	105060	G	A	Rv0095c	156	Non-Essential	Rv0095c	S	D52D	3
SAMN04396853	105060	G	A	Rv0095c	156	Non-Essential	Rv0095c	S	D52D	3
SAMD00117935	105060	G	A	Rv0095c	156	Non-Essential	Rv0095c	S	D52D	2
SAMEA3558652	105060	G	A	Rv0095c	156	Non-Essential	Rv0095c	S	D52D	1
SAMN12551401	105060	G	A	Rv0095c	156	Non-Essential	Rv0095c	S	D52D	2
SAMEA3671226	105060	G	A	Rv0095c	156	Non-Essential	Rv0095c	S	D52D	4
SAMD00117811	105060	G	A	Rv0095c	156	Non-Essential	Rv0095c	S	D52D	2
SAMN06055981	105060	G	A	Rv0095c	156	Non-Essential	Rv0095c	S	D52D	2
SAMN09102219	105060	G	A	Rv0095c	156	Non-Essential	Rv0095c	S	D52D	3
SAMN08892536	105060	G	A	Rv0095c	156	Non-Essential	Rv0095c	S	D52D	3
SAMEA2683107	105060	G	A	Rv0095c	156	Non-Essential	Rv0095c	S	D52D	4
SAMEA2342439	105060	G	A	Rv0095c	156	Non-Essential	Rv0095c	S	D52D	4
SAMEA4798635	105060	G	A	Rv0095c	156	Non-Essential	Rv0095c	S	D52D	4
SAMEA3558224	105060	G	A	Rv0095c	156	Non-Essential	Rv0095c	S	D52D	3
SAMN08436073	105060	G	A	Rv0095c	156	Non-Essential	Rv0095c	S	D52D	1
SAMEA1117745	105060	G	A	Rv0095c	156	Non-Essential	Rv0095c	S	D52D	3
SAMEA1707579	105060	G	A	Rv0095c	156	Non-Essential	Rv0095c	S	D52D	4
SAMEA2533390	105060	G	A	Rv0095c	156	Non-Essential	Rv0095c	S	D52D	4
SAMEA1530845	105060	G	A	Rv0095c	156	Non-Essential	Rv0095c	S	D52D	4
SAMEA3451218	105060	G	A	Rv0095c	156	Non-Essential	Rv0095c	S	D52D	4
SAMEA3421190	105060	G	A	Rv0095c	156	Non-Essential	Rv0095c	S	D52D	4
SAMEA1707240	105060	G	A	Rv0095c	156	Non-Essential	Rv0095c	S	D52D	4
SAMN03647849	105060	G	A	Rv0095c	156	Non-Essential	Rv0095c	S	D52D	3
SAMN08629543	105060	G	A	Rv0095c	156	Non-Essential	Rv0095c	S	D52D	3
SAMEA3448722	105060	G	A	Rv0095c	156	Non-Essential	Rv0095c	S	D52D	3
SAMN03648481	105060	G	A	Rv0095c	156	Non-Essential	Rv0095c	S	D52D	4
SAMN08214894	105060	G	A	Rv0095c	156	Non-Essential	Rv0095c	S	D52D	3
SAMD00117761	105060	G	A	Rv0095c	156	Non-Essential	Rv0095c	S	D52D	2
SAMN04396838	105060	G	A	Rv0095c	156	Non-Essential	Rv0095c	S	D52D	1
SAMN07659532	105060	G	A	Rv0095c	156	Non-Essential	Rv0095c	S	D52D	3
SAMEA1118826	105060	G	A	Rv0095c	156	Non-Essential	Rv0095c	S	D52D	3
SAMN06092349	105060	G	A	Rv0095c	156	Non-Essential	Rv0095c	S	D52D	4
SAMEA1556521	105060	G	A	Rv0095c	156	Non-Essential	Rv0095c	S	D52D	4
SAMN03647127	105060	G	A	Rv0095c	156	Non-Essential	Rv0095c	S	D52D	3
SAMN08795103	105060	G	A	Rv0095c	156	Non-Essential	Rv0095c	S	D52D	2
SAMEA1101624	105060	G	A	Rv0095c	156	Non-Essential	Rv0095c	S	D52D	3
SAMEA5542139	105060	G	A	Rv0095c	156	Non-Essential	Rv0095c	S	D52D	1
SAMEA1118021	105060	G	A	Rv0095c	156	Non-Essential	Rv0095c	S	D52D	1
SAMEA104685058	105060	G	A	Rv0095c	156	Non-Essential	Rv0095c	S	D52D	2
SAMN08379848	105060	G	A	Rv0095c	156	Non-Essential	Rv0095c	S	D52D	4
SAMEA3671534	105060	G	A	Rv0095c	156	Non-Essential	Rv0095c	S	D52D	4
SAMEA3445355	105060	G	A	Rv0095c	156	Non-Essential	Rv0095c	S	D52D	1
SAMEA1397361	105060	G	A	Rv0095c	156	Non-Essential	Rv0095c	S	D52D	3
SAMN03647192	105060	G	A	Rv0095c	156	Non-Essential	Rv0095c	S	D52D	3
SAMN03647543	105060	G	A	Rv0095c	156	Non-Essential	Rv0095c	S	D52D	1
SAMEA104394674	105060	G	A	Rv0095c	156	Non-Essential	Rv0095c	S	D52D	4
SAMEA1397425	105060	G	A	Rv0095c	156	Non-Essential	Rv0095c	S	D52D	3
SAMEA5228926	105060	G	A	Rv0095c	156	Non-Essential	Rv0095c	S	D52D	3
SAMEA3671607	105060	G	A	Rv0095c	156	Non-Essential	Rv0095c	S	D52D	4
SAMEA2535251	105060	G	A	Rv0095c	156	Non-Essential	Rv0095c	S	D52D	4
Peru5125	105060	G	A	Rv0095c	156	Non-Essential	Rv0095c	S	D52D	4
SAMEA1556695	105060	G	A	Rv0095c	156	Non-Essential	Rv0095c	S	D52D	4
SAMEA3562770	105060	G	A	Rv0095c	156	Non-Essential	Rv0095c	S	D52D	4
SAMEA4501279	105060	G	A	Rv0095c	156	Non-Essential	Rv0095c	S	D52D	4
SAMEA2682712	105060	G	A	Rv0095c	156	Non-Essential	Rv0095c	S	D52D	4
TDR162S130L002	105060	G	A	Rv0095c	156	Non-Essential	Rv0095c	S	D52D	4
SAMN08913229	105060	G	A	Rv0095c	156	Non-Essential	Rv0095c	S	D52D	4
SAMEA1688686	105060	G	A	Rv0095c	156	Non-Essential	Rv0095c	S	D52D	4
Peru3334	105060	G	A	Rv0095c	156	Non-Essential	Rv0095c	S	D52D	4
SAMEA1403980	105060	G	A	Rv0095c	156	Non-Essential	Rv0095c	S	D52D	4
SAMEA104684951	105060	G	A	Rv0095c	156	Non-Essential	Rv0095c	S	D52D	4
SAMN06210021	105060	G	A	Rv0095c	156	Non-Essential	Rv0095c	S	D52D	4
SAMN12551555	105060	G	A	Rv0095c	156	Non-Essential	Rv0095c	S	D52D	2
SAMEA1556812	105060	G	A	Rv0095c	156	Non-Essential	Rv0095c	S	D52D	4
SAMN08892547	105060	G	A	Rv0095c	156	Non-Essential	Rv0095c	S	D52D	3
TDR30S135L002	105060	G	A	Rv0095c	156	Non-Essential	Rv0095c	S	D52D	2
SAMEA1118059	105060	G	A	Rv0095c	156	Non-Essential	Rv0095c	S	D52D	4
SAMN13169686	105060	G	A	Rv0095c	156	Non-Essential	Rv0095c	S	D52D	4
SAMEA961598	105060	G	A	Rv0095c	156	Non-Essential	Rv0095c	S	D52D	3
SAMN08892413	105060	G	A	Rv0095c	156	Non-Essential	Rv0095c	S	D52D	3
SAMEA3316422	105060	G	A	Rv0095c	156	Non-Essential	Rv0095c	S	D52D	1
SAMEA2533702	105060	G	A	Rv0095c	156	Non-Essential	Rv0095c	S	D52D	4
SAMD00029553	105060	G	A	Rv0095c	156	Non-Essential	Rv0095c	S	D52D	2
SAMN03647609	105060	G	A	Rv0095c	156	Non-Essential	Rv0095c	S	D52D	3
SAMEA4798663	105060	G	A	Rv0095c	156	Non-Essential	Rv0095c	S	D52D	4
SAMN08794973	105060	G	A	Rv0095c	156	Non-Essential	Rv0095c	S	D52D	4
SAMD00117783	105060	G	A	Rv0095c	156	Non-Essential	Rv0095c	S	D52D	2
SAMEA3725922	105060	G	A	Rv0095c	156	Non-Essential	Rv0095c	S	D52D	4
SAMN06092693	105060	G	A	Rv0095c	156	Non-Essential	Rv0095c	S	D52D	2
SAMN08892543	105060	G	A	Rv0095c	156	Non-Essential	Rv0095c	S	D52D	3
SAMEA3402849	105060	G	A	Rv0095c	156	Non-Essential	Rv0095c	S	D52D	4
SAMN06092651	105060	G	A	Rv0095c	156	Non-Essential	Rv0095c	S	D52D	2
SAMN06579118	105060	G	A	Rv0095c	156	Non-Essential	Rv0095c	S	D52D	3
SAMN07766324	105060	G	A	Rv0095c	156	Non-Essential	Rv0095c	S	D52D	2
SAMN09099742	105060	G	A	Rv0095c	156	Non-Essential	Rv0095c	S	D52D	3
SAMEA104304835	105060	G	A	Rv0095c	156	Non-Essential	Rv0095c	S	D52D	4
SAMN06055881	105060	G	A	Rv0095c	156	Non-Essential	Rv0095c	S	D52D	2
SAMN13169502	105060	G	A	Rv0095c	156	Non-Essential	Rv0095c	S	D52D	4
SAMN09100573	105060	G	A	Rv0095c	156	Non-Essential	Rv0095c	S	D52D	3
SAMEA1117926	105060	G	A	Rv0095c	156	Non-Essential	Rv0095c	S	D52D	3
SAMN08795189	105060	G	A	Rv0095c	156	Non-Essential	Rv0095c	S	D52D	2
SAMEA1117808	105060	G	A	Rv0095c	156	Non-Essential	Rv0095c	S	D52D	4
SAMN02584611	105060	G	A	Rv0095c	156	Non-Essential	Rv0095c	S	D52D	4
SAMEA2534100	105060	G	A	Rv0095c	156	Non-Essential	Rv0095c	S	D52D	4
SAMEA2534548	105060	G	A	Rv0095c	156	Non-Essential	Rv0095c	S	D52D	4
SAMN09101581	105060	G	A	Rv0095c	156	Non-Essential	Rv0095c	S	D52D	3
SAMN02584658	105060	G	A	Rv0095c	156	Non-Essential	Rv0095c	S	D52D	4
IDR1500071800	105060	G	A	Rv0095c	156	Non-Essential	Rv0095c	S	D52D	4
SAMEA1485435	105060	G	A	Rv0095c	156	Non-Essential	Rv0095c	S	D52D	4
SAMEA1118948	105060	G	A	Rv0095c	156	Non-Essential	Rv0095c	S	D52D	3
SAMEA3558761	105060	G	A	Rv0095c	156	Non-Essential	Rv0095c	S	D52D	4
SAMN08215387	105060	G	A	Rv0095c	156	Non-Essential	Rv0095c	S	D52D	3
SAMEA1102237	105060	G	A	Rv0095c	156	Non-Essential	Rv0095c	S	D52D	3
SAMEA2534355	105060	G	A	Rv0095c	156	Non-Essential	Rv0095c	S	D52D	4
SAMD00029437	105060	G	A	Rv0095c	156	Non-Essential	Rv0095c	S	D52D	1
SAMN07659910	105060	G	A	Rv0095c	156	Non-Essential	Rv0095c	S	D52D	3
SAMN08379906	105060	G	A	Rv0095c	156	Non-Essential	Rv0095c	S	D52D	4
SAMD00029500	105060	G	A	Rv0095c	156	Non-Essential	Rv0095c	S	D52D	2
SAMEA5282438	105060	G	A	Rv0095c	156	Non-Essential	Rv0095c	S	D52D	4
SAMN08795009	105060	G	A	Rv0095c	156	Non-Essential	Rv0095c	S	D52D	4
SAMN06091850	105060	G	A	Rv0095c	156	Non-Essential	Rv0095c	S	D52D	4
SAMEA1119646	105060	G	A	Rv0095c	156	Non-Essential	Rv0095c	S	D52D	3
SAMN03647507	105060	G	A	Rv0095c	156	Non-Essential	Rv0095c	S	D52D	4
SAMN03648541	105060	G	A	Rv0095c	156	Non-Essential	Rv0095c	S	D52D	3
SAMEA3505304	105060	G	A	Rv0095c	156	Non-Essential	Rv0095c	S	D52D	2
Peru4304	105060	G	A	Rv0095c	156	Non-Essential	Rv0095c	S	D52D	2
SAMEA1016130	105060	G	A	Rv0095c	156	Non-Essential	Rv0095c	S	D52D	4
SAMN09099935	105060	G	A	Rv0095c	156	Non-Essential	Rv0095c	S	D52D	1
SAMEA1119090	105060	G	A	Rv0095c	156	Non-Essential	Rv0095c	S	D52D	4
SAMEA1405905	105060	G	A	Rv0095c	156	Non-Essential	Rv0095c	S	D52D	3
SAMEA1117663	105060	G	A	Rv0095c	156	Non-Essential	Rv0095c	S	D52D	3
SAMEA1117599	105060	G	A	Rv0095c	156	Non-Essential	Rv0095c	S	D52D	3
SAMEA5076168	105060	G	A	Rv0095c	156	Non-Essential	Rv0095c	S	D52D	4
SAMN05806770	105060	G	A	Rv0095c	156	Non-Essential	Rv0095c	S	D52D	3
SAMN06579070	105060	G	A	Rv0095c	156	Non-Essential	Rv0095c	S	D52D	3
SAMEA1707842	105060	G	A	Rv0095c	156	Non-Essential	Rv0095c	S	D52D	1
SAMEA1102213	105060	G	A	Rv0095c	156	Non-Essential	Rv0095c	S	D52D	3
SAMEA1405973	105060	G	A	Rv0095c	156	Non-Essential	Rv0095c	S	D52D	3
SAMN12551252	105060	G	A	Rv0095c	156	Non-Essential	Rv0095c	S	D52D	2
SAMEA4798705	105060	G	A	Rv0095c	156	Non-Essential	Rv0095c	S	D52D	4
SAMD00029513	105060	G	A	Rv0095c	156	Non-Essential	Rv0095c	S	D52D	2
SAMN08629064	105060	G	A	Rv0095c	156	Non-Essential	Rv0095c	S	D52D	1
SAMEA2533541	105060	G	A	Rv0095c	156	Non-Essential	Rv0095c	S	D52D	3
SAMN06092283	105060	G	A	Rv0095c	156	Non-Essential	Rv0095c	S	D52D	1
SAMN09101689	105060	G	A	Rv0095c	156	Non-Essential	Rv0095c	S	D52D	3
SAMEA1530653	105060	G	A	Rv0095c	156	Non-Essential	Rv0095c	S	D52D	4
SAMEA4032461	105060	G	A	Rv0095c	156	Non-Essential	Rv0095c	S	D52D	2
SAMN07659631	105060	G	A	Rv0095c	156	Non-Essential	Rv0095c	S	D52D	1
SAMEA3715719	105060	G	A	Rv0095c	156	Non-Essential	Rv0095c	S	D52D	4
SAMN09099588	105060	G	A	Rv0095c	156	Non-Essential	Rv0095c	S	D52D	3
SAMEA1119352	105060	G	A	Rv0095c	156	Non-Essential	Rv0095c	S	D52D	4
SAMN03647685	105060	G	A	Rv0095c	156	Non-Essential	Rv0095c	S	D52D	3
SAMN13169595	105060	G	A	Rv0095c	156	Non-Essential	Rv0095c	S	D52D	4
SAMEA1118334	105060	G	A	Rv0095c	156	Non-Essential	Rv0095c	S	D52D	4
SAMEA5330425	105060	G	A	Rv0095c	156	Non-Essential	Rv0095c	S	D52D	4
SAMEA95537668	105060	G	A	Rv0095c	156	Non-Essential	Rv0095c	S	D52D	4
SAMEA4744305	105060	G	A	Rv0095c	156	Non-Essential	Rv0095c	S	D52D	4
SAMN08379688	105060	G	A	Rv0095c	156	Non-Essential	Rv0095c	S	D52D	2
SAMEA1118345	105060	G	A	Rv0095c	156	Non-Essential	Rv0095c	S	D52D	3
SAMEA4798881	105060	G	A	Rv0095c	156	Non-Essential	Rv0095c	S	D52D	4
SAMN08892437	105060	G	A	Rv0095c	156	Non-Essential	Rv0095c	S	D52D	3
SAMEA2534037	105060	G	A	Rv0095c	156	Non-Essential	Rv0095c	S	D52D	4
SAMEA4744330	105060	G	A	Rv0095c	156	Non-Essential	Rv0095c	S	D52D	4
SAMEA3512746	105060	G	A	Rv0095c	156	Non-Essential	Rv0095c	S	D52D	4
SAMN08912776	105060	G	A	Rv0095c	156	Non-Essential	Rv0095c	S	D52D	4
SAMEA1885938	105060	G	A	Rv0095c	156	Non-Essential	Rv0095c	S	D52D	2
SAMN08708773	105060	G	A	Rv0095c	156	Non-Essential	Rv0095c	S	D52D	4
SAMN03648276	105060	G	A	Rv0095c	156	Non-Essential	Rv0095c	S	D52D	3
Peru3309	105060	G	A	Rv0095c	156	Non-Essential	Rv0095c	S	D52D	4
SAMN07658200	105060	G	A	Rv0095c	156	Non-Essential	Rv0095c	S	D52D	3
SAMN02599030	105060	G	A	Rv0095c	156	Non-Essential	Rv0095c	S	D52D	1
TDR14S122L002	105060	G	A	Rv0095c	156	Non-Essential	Rv0095c	S	D52D	1
SAMN09100013	105060	G	A	Rv0095c	156	Non-Essential	Rv0095c	S	D52D	3
SAMEA1569266	105060	G	A	Rv0095c	156	Non-Essential	Rv0095c	S	D52D	4
SAMN08612785	105060	G	A	Rv0095c	156	Non-Essential	Rv0095c	S	D52D	4
SAMEA1706660	105060	G	A	Rv0095c	156	Non-Essential	Rv0095c	S	D52D	2
SAMEA1397522	105060	G	A	Rv0095c	156	Non-Essential	Rv0095c	S	D52D	3
SAMN03648581	105060	G	A	Rv0095c	156	Non-Essential	Rv0095c	S	D52D	4
SAMN08892395	105060	G	A	Rv0095c	156	Non-Essential	Rv0095c	S	D52D	3
SAMN07658771	105060	G	A	Rv0095c	156	Non-Essential	Rv0095c	S	D52D	3
SAMEA1403945	105060	G	A	Rv0095c	156	Non-Essential	Rv0095c	S	D52D	4
02R1630	105060	G	A	Rv0095c	156	Non-Essential	Rv0095c	S	D52D	4
SAMEA961658	105060	G	A	Rv0095c	156	Non-Essential	Rv0095c	S	D52D	3
SAMN08214871	105060	G	A	Rv0095c	156	Non-Essential	Rv0095c	S	D52D	3
SAMEA5157191	105060	G	A	Rv0095c	156	Non-Essential	Rv0095c	S	D52D	4
SAMN08892441	105060	G	A	Rv0095c	156	Non-Essential	Rv0095c	S	D52D	3
SAMEA1569128	105060	G	A	Rv0095c	156	Non-Essential	Rv0095c	S	D52D	4
SAMEA1118654	105060	G	A	Rv0095c	156	Non-Essential	Rv0095c	S	D52D	3
SAMN07765989	105060	G	A	Rv0095c	156	Non-Essential	Rv0095c	S	D52D	1
SAMEA5282491	105060	G	A	Rv0095c	156	Non-Essential	Rv0095c	S	D52D	1
SAMN08215423	105060	G	A	Rv0095c	156	Non-Essential	Rv0095c	S	D52D	4
SAMEA3671516	105060	G	A	Rv0095c	156	Non-Essential	Rv0095c	S	D52D	4
SAMN06210024	105060	G	A	Rv0095c	156	Non-Essential	Rv0095c	S	D52D	4
SAMN05001036	105060	G	A	Rv0095c	156	Non-Essential	Rv0095c	S	D52D	2
SAMEA1405907	105060	G	A	Rv0095c	156	Non-Essential	Rv0095c	S	D52D	1
1774	105060	G	A	Rv0095c	156	Non-Essential	Rv0095c	S	D52D	4
SAMEA1406124	105060	G	A	Rv0095c	156	Non-Essential	Rv0095c	S	D52D	4
SAMEA1118868	105060	G	A	Rv0095c	156	Non-Essential	Rv0095c	S	D52D	1
SAMEA1485460	105060	G	A	Rv0095c	156	Non-Essential	Rv0095c	S	D52D	4
SAMEA3671368	105060	G	A	Rv0095c	156	Non-Essential	Rv0095c	S	D52D	4
SAMEA4798810	105060	G	A	Rv0095c	156	Non-Essential	Rv0095c	S	D52D	4
SAMN07999139	105060	G	A	Rv0095c	156	Non-Essential	Rv0095c	S	D52D	2
SAMEA1119417	105060	G	A	Rv0095c	156	Non-Essential	Rv0095c	S	D52D	3
SAMEA2297133	105060	G	A	Rv0095c	156	Non-Essential	Rv0095c	S	D52D	1
IDR1600018201	105060	G	A	Rv0095c	156	Non-Essential	Rv0095c	S	D52D	4
SAMEA3558736	105060	G	A	Rv0095c	156	Non-Essential	Rv0095c	S	D52D	4
SAMEA3558721	105060	G	A	Rv0095c	156	Non-Essential	Rv0095c	S	D52D	4
SAMN03648326	105060	G	A	Rv0095c	156	Non-Essential	Rv0095c	S	D52D	3
SAMEA3359391	105060	G	A	Rv0095c	156	Non-Essential	Rv0095c	S	D52D	4
SAMEA1118942	105060	G	A	Rv0095c	156	Non-Essential	Rv0095c	S	D52D	3
SAMEA3436391	105060	G	A	Rv0095c	156	Non-Essential	Rv0095c	S	D52D	4
SAMN06578972	105060	G	A	Rv0095c	156	Non-Essential	Rv0095c	S	D52D	3
SAMN02567683	105060	G	A	Rv0095c	156	Non-Essential	Rv0095c	S	D52D	4
SAMN07658936	105060	G	A	Rv0095c	156	Non-Essential	Rv0095c	S	D52D	3
SAMEA104357576	105060	G	A	Rv0095c	156	Non-Essential	Rv0095c	S	D52D	4
SAMN07658376	105060	G	A	Rv0095c	156	Non-Essential	Rv0095c	S	D52D	1
SAMN06210020	105060	G	A	Rv0095c	156	Non-Essential	Rv0095c	S	D52D	4
SAMN08629249	105060	G	A	Rv0095c	156	Non-Essential	Rv0095c	S	D52D	3
SAMEA95419918	105060	G	A	Rv0095c	156	Non-Essential	Rv0095c	S	D52D	4
SAMN08795294	105060	G	A	Rv0095c	156	Non-Essential	Rv0095c	S	D52D	4
SAMN07766258	105060	G	A	Rv0095c	156	Non-Essential	Rv0095c	S	D52D	3
SAMN12551139	105060	G	A	Rv0095c	156	Non-Essential	Rv0095c	S	D52D	2
SAMEA3402855	105060	G	A	Rv0095c	156	Non-Essential	Rv0095c	S	D52D	4
SAMN07766001	105060	G	A	Rv0095c	156	Non-Essential	Rv0095c	S	D52D	3
SAMN09914713	105060	G	A	Rv0095c	156	Non-Essential	Rv0095c	S	D52D	4
SAMEA1569169	105060	G	A	Rv0095c	156	Non-Essential	Rv0095c	S	D52D	4
SAMEA5282445	105060	G	A	Rv0095c	156	Non-Essential	Rv0095c	S	D52D	4
SAMN07766331	105060	G	A	Rv0095c	156	Non-Essential	Rv0095c	S	D52D	3
SAMEA4473398	105060	G	A	Rv0095c	156	Non-Essential	Rv0095c	S	D52D	4
SAMEA1885997	105060	G	A	Rv0095c	156	Non-Essential	Rv0095c	S	D52D	3
SAMEA1101789	105060	G	A	Rv0095c	156	Non-Essential	Rv0095c	S	D52D	3
SAMEA3715409	105060	G	A	Rv0095c	156	Non-Essential	Rv0095c	S	D52D	4
SAMEA1556697	105060	G	A	Rv0095c	156	Non-Essential	Rv0095c	S	D52D	4
SAMN08612775	105060	G	A	Rv0095c	156	Non-Essential	Rv0095c	S	D52D	4
SAMN07765927	105060	G	A	Rv0095c	156	Non-Essential	Rv0095c	S	D52D	2
SAMEA2297076	105060	G	A	Rv0095c	156	Non-Essential	Rv0095c	S	D52D	3
SAMEA4798727	105060	G	A	Rv0095c	156	Non-Essential	Rv0095c	S	D52D	4
SAMEA1707458	105060	G	A	Rv0095c	156	Non-Essential	Rv0095c	S	D52D	4
SAMEA3558473	105060	G	A	Rv0095c	156	Non-Essential	Rv0095c	S	D52D	4
SAMEA5626245	105060	G	A	Rv0095c	156	Non-Essential	Rv0095c	S	D52D	3
SAMEA2535029	105060	G	A	Rv0095c	156	Non-Essential	Rv0095c	S	D52D	2
SAMN07765871	105060	G	A	Rv0095c	156	Non-Essential	Rv0095c	S	D52D	1
SAMEA104362286	105060	G	A	Rv0095c	156	Non-Essential	Rv0095c	S	D52D	4
SAMN05969980	105060	G	A	Rv0095c	156	Non-Essential	Rv0095c	S	D52D	3
SAMEA1101888	105060	G	A	Rv0095c	156	Non-Essential	Rv0095c	S	D52D	3
SAMN02598989	105060	G	A	Rv0095c	156	Non-Essential	Rv0095c	S	D52D	1
SAMN09685356	105060	G	A	Rv0095c	156	Non-Essential	Rv0095c	S	D52D	4
SAMEA1117713	105060	G	A	Rv0095c	156	Non-Essential	Rv0095c	S	D52D	5
Peru4613	105060	G	A	Rv0095c	156	Non-Essential	Rv0095c	S	D52D	4
SAMN09101496	105060	G	A	Rv0095c	156	Non-Essential	Rv0095c	S	D52D	4
SAMN09380041	105060	G	A	Rv0095c	156	Non-Essential	Rv0095c	S	D52D	4
SAMN03647567	105060	G	A	Rv0095c	156	Non-Essential	Rv0095c	S	D52D	4
TDR51S125L002	105060	G	A	Rv0095c	156	Non-Essential	Rv0095c	S	D52D	4
SAMEA1119859	105060	G	A	Rv0095c	156	Non-Essential	Rv0095c	S	D52D	3
SAMD00117903	105060	G	A	Rv0095c	156	Non-Essential	Rv0095c	S	D52D	4
SAMN08215065	105060	G	A	Rv0095c	156	Non-Essential	Rv0095c	S	D52D	4
SAMN03647712	105060	G	A	Rv0095c	156	Non-Essential	Rv0095c	S	D52D	6
SAMEA3558751	105060	G	A	Rv0095c	156	Non-Essential	Rv0095c	S	D52D	4
SAMN08708569	105060	G	A	Rv0095c	156	Non-Essential	Rv0095c	S	D52D	4
SAMEA3420929	105060	G	A	Rv0095c	156	Non-Essential	Rv0095c	S	D52D	4
SAMN08612779	105060	G	A	Rv0095c	156	Non-Essential	Rv0095c	S	D52D	4
SAMN08795195	105060	G	A	Rv0095c	156	Non-Essential	Rv0095c	S	D52D	4
SAMN03648466	105060	G	A	Rv0095c	156	Non-Essential	Rv0095c	S	D52D	3
SAMEA3671539	105060	G	A	Rv0095c	156	Non-Essential	Rv0095c	S	D52D	4
SAMN07659590	105060	G	A	Rv0095c	156	Non-Essential	Rv0095c	S	D52D	1
SAMN03647112	105060	G	A	Rv0095c	156	Non-Essential	Rv0095c	S	D52D	3
SAMD00029545	105060	G	A	Rv0095c	156	Non-Essential	Rv0095c	S	D52D	2
SAMEA3558356	105060	G	A	Rv0095c	156	Non-Essential	Rv0095c	S	D52D	4
SAMEA1117649	105060	G	A	Rv0095c	156	Non-Essential	Rv0095c	S	D52D	2
SAMEA2782922	105060	G	A	Rv0095c	156	Non-Essential	Rv0095c	S	D52D	1
SAMEA1118528	105060	G	A	Rv0095c	156	Non-Essential	Rv0095c	S	D52D	3
SAMN06092339	105060	G	A	Rv0095c	156	Non-Essential	Rv0095c	S	D52D	2
SAMN07765968	105060	G	A	Rv0095c	156	Non-Essential	Rv0095c	S	D52D	3
SAMN03648256	105060	G	A	Rv0095c	156	Non-Essential	Rv0095c	S	D52D	3
SAMN06055777	105060	G	A	Rv0095c	156	Non-Essential	Rv0095c	S	D52D	2
IDR1600052366	105060	G	A	Rv0095c	156	Non-Essential	Rv0095c	S	D52D	2
SAMEA1119270	105060	G	A	Rv0095c	156	Non-Essential	Rv0095c	S	D52D	1
SAMN08913317	105060	G	A	Rv0095c	156	Non-Essential	Rv0095c	S	D52D	4
SAMN08795270	105060	G	A	Rv0095c	156	Non-Essential	Rv0095c	S	D52D	2
SAMEA5282380	105060	G	A	Rv0095c	156	Non-Essential	Rv0095c	S	D52D	4
SAMEA5076068	105060	G	A	Rv0095c	156	Non-Essential	Rv0095c	S	D52D	4
SAMEA1119153	105060	G	A	Rv0095c	156	Non-Essential	Rv0095c	S	D52D	3
SAMN13169501	105060	G	A	Rv0095c	156	Non-Essential	Rv0095c	S	D52D	4
SAMN09100550	105060	G	A	Rv0095c	156	Non-Essential	Rv0095c	S	D52D	3
SAMEA4473405	105060	G	A	Rv0095c	156	Non-Essential	Rv0095c	S	D52D	4
SAMN03648456	105060	G	A	Rv0095c	156	Non-Essential	Rv0095c	S	D52D	3
SAMN05276426	105060	G	A	Rv0095c	156	Non-Essential	Rv0095c	S	D52D	3
SAMEA1101505	105060	G	A	Rv0095c	156	Non-Essential	Rv0095c	S	D52D	3
SAMN08795072	105060	G	A	Rv0095c	156	Non-Essential	Rv0095c	S	D52D	2
TDR24S169L002	105060	G	A	Rv0095c	156	Non-Essential	Rv0095c	S	D52D	4
SAMN08166032	105060	G	A	Rv0095c	156	Non-Essential	Rv0095c	S	D52D	2
SAMEA1569247	105060	G	A	Rv0095c	156	Non-Essential	Rv0095c	S	D52D	4
SAMEA5282429	105060	G	A	Rv0095c	156	Non-Essential	Rv0095c	S	D52D	2
SAMN03647389	105060	G	A	Rv0095c	156	Non-Essential	Rv0095c	S	D52D	3
SAMEA1707422	105060	G	A	Rv0095c	156	Non-Essential	Rv0095c	S	D52D	4
SAMD00117784	105060	G	A	Rv0095c	156	Non-Essential	Rv0095c	S	D52D	2
SAMEA2534106	105060	G	A	Rv0095c	156	Non-Essential	Rv0095c	S	D52D	4
SAMEA5607343	105060	G	A	Rv0095c	156	Non-Essential	Rv0095c	S	D52D	4
SAMEA1117970	105060	G	A	Rv0095c	156	Non-Essential	Rv0095c	S	D52D	3
TDR53combined	105060	G	A	Rv0095c	156	Non-Essential	Rv0095c	S	D52D	4
SAMEA3671417	105060	G	A	Rv0095c	156	Non-Essential	Rv0095c	S	D52D	4
SAMN07236400	105060	G	A	Rv0095c	156	Non-Essential	Rv0095c	S	D52D	2
SAMN13169424	105060	G	A	Rv0095c	156	Non-Essential	Rv0095c	S	D52D	4
SAMEA2297071	105060	G	A	Rv0095c	156	Non-Essential	Rv0095c	S	D52D	4
SAMN08629199	105060	G	A	Rv0095c	156	Non-Essential	Rv0095c	S	D52D	1
SAMEA2533942	105060	G	A	Rv0095c	156	Non-Essential	Rv0095c	S	D52D	6
SAMEA2535327	105060	G	A	Rv0095c	156	Non-Essential	Rv0095c	S	D52D	3
SAMEA1707852	105060	G	A	Rv0095c	156	Non-Essential	Rv0095c	S	D52D	1
SAMN10663304	105060	G	A	Rv0095c	156	Non-Essential	Rv0095c	S	D52D	1
SAMEA1118754	105060	G	A	Rv0095c	156	Non-Essential	Rv0095c	S	D52D	3
SAMN02584622	105060	G	A	Rv0095c	156	Non-Essential	Rv0095c	S	D52D	4
SAMN08629069	105060	G	A	Rv0095c	156	Non-Essential	Rv0095c	S	D52D	1
TDR146S112L002	105060	G	A	Rv0095c	156	Non-Essential	Rv0095c	S	D52D	1
SAMN08892475	105060	G	A	Rv0095c	156	Non-Essential	Rv0095c	S	D52D	3
SAMEA5569925	105060	G	A	Rv0095c	156	Non-Essential	Rv0095c	S	D52D	4
SAMN08215343	105060	G	A	Rv0095c	156	Non-Essential	Rv0095c	S	D52D	2
SAMN07766451	105060	G	A	Rv0095c	156	Non-Essential	Rv0095c	S	D52D	3
SAMEA1904009	105060	G	A	Rv0095c	156	Non-Essential	Rv0095c	S	D52D	4
SAMN03648688	105060	G	A	Rv0095c	156	Non-Essential	Rv0095c	S	D52D	4
SAMEA4975727	105060	G	A	Rv0095c	156	Non-Essential	Rv0095c	S	D52D	2
IDR1600025154	105060	G	A	Rv0095c	156	Non-Essential	Rv0095c	S	D52D	4
SAMEA2535328	105060	G	A	Rv0095c	156	Non-Essential	Rv0095c	S	D52D	4
SAMEA1556849	105060	G	A	Rv0095c	156	Non-Essential	Rv0095c	S	D52D	4
SAMN03647890	105060	G	A	Rv0095c	156	Non-Essential	Rv0095c	S	D52D	1
SAMD00117870	105060	G	A	Rv0095c	156	Non-Essential	Rv0095c	S	D52D	2
IDR1500055398	105060	G	A	Rv0095c	156	Non-Essential	Rv0095c	S	D52D	1
SAMN08626334	105060	G	A	Rv0095c	156	Non-Essential	Rv0095c	S	D52D	2
SAMD00117946	105060	G	A	Rv0095c	156	Non-Essential	Rv0095c	S	D52D	2
SAMEA2533841	105060	G	A	Rv0095c	156	Non-Essential	Rv0095c	S	D52D	4
SAMEA1101552	105060	G	A	Rv0095c	156	Non-Essential	Rv0095c	S	D52D	3
SAMEA104614364	105060	G	A	Rv0095c	156	Non-Essential	Rv0095c	S	D52D	4
SAMEA104362099	105060	G	A	Rv0095c	156	Non-Essential	Rv0095c	S	D52D	4
SAMEA2709881	105060	G	A	Rv0095c	156	Non-Essential	Rv0095c	S	D52D	4
SAMEA3334367	105060	G	A	Rv0095c	156	Non-Essential	Rv0095c	S	D52D	4
SAMN10462612	105060	G	A	Rv0095c	156	Non-Essential	Rv0095c	S	D52D	2
TDR56S168L002	105060	G	A	Rv0095c	156	Non-Essential	Rv0095c	S	D52D	4
SAMN08629142	105060	G	A	Rv0095c	156	Non-Essential	Rv0095c	S	D52D	1
SAMN02414897	105060	G	A	Rv0095c	156	Non-Essential	Rv0095c	S	D52D	4
SAMEA3558412	105060	G	A	Rv0095c	156	Non-Essential	Rv0095c	S	D52D	4
SAMN07766276	105060	G	A	Rv0095c	156	Non-Essential	Rv0095c	S	D52D	3
SAMEA1406086	105060	G	A	Rv0095c	156	Non-Essential	Rv0095c	S	D52D	1
SAMEA5282507	105060	G	A	Rv0095c	156	Non-Essential	Rv0095c	S	D52D	4
SAMEA104172429	105060	G	A	Rv0095c	156	Non-Essential	Rv0095c	S	D52D	2
SAMEA1118205	105060	G	A	Rv0095c	156	Non-Essential	Rv0095c	S	D52D	3
SAMD00029514	105060	G	A	Rv0095c	156	Non-Essential	Rv0095c	S	D52D	2
SAMN02584626	105060	G	A	Rv0095c	156	Non-Essential	Rv0095c	S	D52D	4
SAMN09100024	105060	G	A	Rv0095c	156	Non-Essential	Rv0095c	S	D52D	3
SAMEA1117735	105060	G	A	Rv0095c	156	Non-Essential	Rv0095c	S	D52D	3
SAMEA4798924	105060	G	A	Rv0095c	156	Non-Essential	Rv0095c	S	D52D	4
IDR1600037187	105060	G	A	Rv0095c	156	Non-Essential	Rv0095c	S	D52D	4
SAMEA104394462	105060	G	A	Rv0095c	156	Non-Essential	Rv0095c	S	D52D	4
TDR41S164L002	105060	G	A	Rv0095c	156	Non-Essential	Rv0095c	S	D52D	3
SAMN06210063	105060	G	A	Rv0095c	156	Non-Essential	Rv0095c	S	D52D	4
SAMEA4798798	105060	G	A	Rv0095c	156	Non-Essential	Rv0095c	S	D52D	4
SAMEA3430673	105060	G	A	Rv0095c	156	Non-Essential	Rv0095c	S	D52D	2
SAMEA1118782	105060	G	A	Rv0095c	156	Non-Essential	Rv0095c	S	D52D	3
SAMEA3449887	105060	G	A	Rv0095c	156	Non-Essential	Rv0095c	S	D52D	4
SAMEA3512797	105060	G	A	Rv0095c	156	Non-Essential	Rv0095c	S	D52D	4
SAMEA1556832	105060	G	A	Rv0095c	156	Non-Essential	Rv0095c	S	D52D	4
Peru2972	105060	G	A	Rv0095c	156	Non-Essential	Rv0095c	S	D52D	4
SAMN07766334	105060	G	A	Rv0095c	156	Non-Essential	Rv0095c	S	D52D	3
SAMEA104362525	105060	G	A	Rv0095c	156	Non-Essential	Rv0095c	S	D52D	4
TDR230S202L002	105060	G	A	Rv0095c	156	Non-Essential	Rv0095c	S	D52D	2
SAMN08913197	105060	G	A	Rv0095c	156	Non-Essential	Rv0095c	S	D52D	4
SAMN05276411	105060	G	A	Rv0095c	156	Non-Essential	Rv0095c	S	D52D	3
SAMEA3443372	105060	G	A	Rv0095c	156	Non-Essential	Rv0095c	S	D52D	1
SAMN08892414	105060	G	A	Rv0095c	156	Non-Essential	Rv0095c	S	D52D	3
SAMN08637029	105060	G	A	Rv0095c	156	Non-Essential	Rv0095c	S	D52D	4
SAMEA2534588	105060	G	A	Rv0095c	156	Non-Essential	Rv0095c	S	D52D	4
SAMEA1102329	105060	G	A	Rv0095c	156	Non-Essential	Rv0095c	S	D52D	3
SAMEA4798888	105060	G	A	Rv0095c	156	Non-Essential	Rv0095c	S	D52D	4
SAMN08215310	105060	G	A	Rv0095c	156	Non-Essential	Rv0095c	S	D52D	4
SAMEA2533510	105060	G	A	Rv0095c	156	Non-Essential	Rv0095c	S	D52D	1
SAMD00029475	105060	G	A	Rv0095c	156	Non-Essential	Rv0095c	S	D52D	2
SAMEA2534316	105060	G	A	Rv0095c	156	Non-Essential	Rv0095c	S	D52D	4
SAMN07659562	105060	G	A	Rv0095c	156	Non-Essential	Rv0095c	S	D52D	3
SAMN09102434	105060	G	A	Rv0095c	156	Non-Essential	Rv0095c	S	D52D	3
SAMEA3230401	105060	G	A	Rv0095c	156	Non-Essential	Rv0095c	S	D52D	4
SAMN02599110	105060	G	A	Rv0095c	156	Non-Essential	Rv0095c	S	D52D	1
SAMN03647994	105060	G	A	Rv0095c	156	Non-Essential	Rv0095c	S	D52D	1
SAMN08709290	105060	G	A	Rv0095c	156	Non-Essential	Rv0095c	S	D52D	4
SAMN04633294	105060	G	A	Rv0095c	156	Non-Essential	Rv0095c	S	D52D	4
SAMN08708314	105060	G	A	Rv0095c	156	Non-Essential	Rv0095c	S	D52D	4
SAMN03648719	105060	G	A	Rv0095c	156	Non-Essential	Rv0095c	S	D52D	4
SAMEA1688700	105060	G	A	Rv0095c	156	Non-Essential	Rv0095c	S	D52D	4
SAMN03647683	105060	G	A	Rv0095c	156	Non-Essential	Rv0095c	S	D52D	3
SAMEA3443158	105060	G	A	Rv0095c	156	Non-Essential	Rv0095c	S	D52D	3
SAMN02380997	105060	G	A	Rv0095c	156	Non-Essential	Rv0095c	S	D52D	4
SAMEA1119665	105060	G	A	Rv0095c	156	Non-Essential	Rv0095c	S	D52D	4
SAMN02567709	105060	G	A	Rv0095c	156	Non-Essential	Rv0095c	S	D52D	4
SAMN08626139	105060	G	A	Rv0095c	156	Non-Essential	Rv0095c	S	D52D	2
SAMN08892443	105060	G	A	Rv0095c	156	Non-Essential	Rv0095c	S	D52D	3
SAMN02599065	105060	G	A	Rv0095c	156	Non-Essential	Rv0095c	S	D52D	1
SAMN03648540	105060	G	A	Rv0095c	156	Non-Essential	Rv0095c	S	D52D	5
SAMEA5076086	105060	G	A	Rv0095c	156	Non-Essential	Rv0095c	S	D52D	4
SAMEA1118683	105060	G	A	Rv0095c	156	Non-Essential	Rv0095c	S	D52D	4
SAMN12551268	105060	G	A	Rv0095c	156	Non-Essential	Rv0095c	S	D52D	2
SAMEA2535188	105060	G	A	Rv0095c	156	Non-Essential	Rv0095c	S	D52D	2
SAMN07659337	105060	G	A	Rv0095c	156	Non-Essential	Rv0095c	S	D52D	3
SAMEA1902643	105060	G	A	Rv0095c	156	Non-Essential	Rv0095c	S	D52D	3
SAMN08214803	105060	G	A	Rv0095c	156	Non-Essential	Rv0095c	S	D52D	4
SAMN03647402	105060	G	A	Rv0095c	156	Non-Essential	Rv0095c	S	D52D	3
SAMEA1117971	105060	G	A	Rv0095c	156	Non-Essential	Rv0095c	S	D52D	3
SAMEA1119014	105060	G	A	Rv0095c	156	Non-Essential	Rv0095c	S	D52D	3
SAMEA104357487	105060	G	A	Rv0095c	156	Non-Essential	Rv0095c	S	D52D	4
SAMEA3562767	105060	G	A	Rv0095c	156	Non-Essential	Rv0095c	S	D52D	4
SAMEA1117910	105060	G	A	Rv0095c	156	Non-Essential	Rv0095c	S	D52D	3
SAMEA1118474	105060	G	A	Rv0095c	156	Non-Essential	Rv0095c	S	D52D	1
SAMEA3558396	105060	G	A	Rv0095c	156	Non-Essential	Rv0095c	S	D52D	4
SAMEA1485472	105060	G	A	Rv0095c	156	Non-Essential	Rv0095c	S	D52D	4
SAMN09099964	105060	G	A	Rv0095c	156	Non-Essential	Rv0095c	S	D52D	3
SAMN12551311	105060	G	A	Rv0095c	156	Non-Essential	Rv0095c	S	D52D	2
SAMEA3671278	105060	G	A	Rv0095c	156	Non-Essential	Rv0095c	S	D52D	4
SAMEA1102348	105060	G	A	Rv0095c	156	Non-Essential	Rv0095c	S	D52D	3
SAMEA2534472	105060	G	A	Rv0095c	156	Non-Essential	Rv0095c	S	D52D	4
SAMN07766355	105060	G	A	Rv0095c	156	Non-Essential	Rv0095c	S	D52D	3
SAMEA1556582	105060	G	A	Rv0095c	156	Non-Essential	Rv0095c	S	D52D	4
SAMEA1556694	105060	G	A	Rv0095c	156	Non-Essential	Rv0095c	S	D52D	4
SAMEA3262970	105060	G	A	Rv0095c	156	Non-Essential	Rv0095c	S	D52D	4
ERR036204	105060	G	A	Rv0095c	156	Non-Essential	Rv0095c	S	D52D	4
SAMEA4798767	105060	G	A	Rv0095c	156	Non-Essential	Rv0095c	S	D52D	4
SAMEA2534055	105060	G	A	Rv0095c	156	Non-Essential	Rv0095c	S	D52D	4
SAMEA1118907	105060	G	A	Rv0095c	156	Non-Essential	Rv0095c	S	D52D	3
SAMEA104685107	105060	G	A	Rv0095c	156	Non-Essential	Rv0095c	S	D52D	4
SAMN08629514	105060	G	A	Rv0095c	156	Non-Essential	Rv0095c	S	D52D	4
SAMEA2296977	105060	G	A	Rv0095c	156	Non-Essential	Rv0095c	S	D52D	3
SAMN03647421	105060	G	A	Rv0095c	156	Non-Essential	Rv0095c	S	D52D	3
SAMN09100138	105060	G	A	Rv0095c	156	Non-Essential	Rv0095c	S	D52D	3
SAMN06210075	105060	G	A	Rv0095c	156	Non-Essential	Rv0095c	S	D52D	4
SAMN07766423	105060	G	A	Rv0095c	156	Non-Essential	Rv0095c	S	D52D	3
SAMN07236452	105060	G	A	Rv0095c	156	Non-Essential	Rv0095c	S	D52D	1
SAMN06092206	105060	G	A	Rv0095c	156	Non-Essential	Rv0095c	S	D52D	2
SAMN08629171	105060	G	A	Rv0095c	156	Non-Essential	Rv0095c	S	D52D	1
SAMEA3558712	105060	G	A	Rv0095c	156	Non-Essential	Rv0095c	S	D52D	4
SAMN08376230	105060	G	A	Rv0095c	156	Non-Essential	Rv0095c	S	D52D	2
SAMEA4798838	105060	G	A	Rv0095c	156	Non-Essential	Rv0095c	S	D52D	4
1479146369267T183415lib5039nextseqn0035151bp	105060	G	A	Rv0095c	156	Non-Essential	Rv0095c	S	D52D	2
SAMN04633285	105060	G	A	Rv0095c	156	Non-Essential	Rv0095c	S	D52D	4
SAMN03648470	105060	G	A	Rv0095c	156	Non-Essential	Rv0095c	S	D52D	3
SAMEA1117746	105060	G	A	Rv0095c	156	Non-Essential	Rv0095c	S	D52D	3
SAMN07344589	105060	G	A	Rv0095c	156	Non-Essential	Rv0095c	S	D52D	1
SAMEA1530813	105060	G	A	Rv0095c	156	Non-Essential	Rv0095c	S	D52D	4
SAMN07660057	105060	G	A	Rv0095c	156	Non-Essential	Rv0095c	S	D52D	3
SAMEA3558427	105060	G	A	Rv0095c	156	Non-Essential	Rv0095c	S	D52D	4
SAMEA4744412	105060	G	A	Rv0095c	156	Non-Essential	Rv0095c	S	D52D	4
SAMEA1118815	105060	G	A	Rv0095c	156	Non-Essential	Rv0095c	S	D52D	3
SAMEA1118296	105060	G	A	Rv0095c	156	Non-Essential	Rv0095c	S	D52D	4
SAMN03647136	105060	G	A	Rv0095c	156	Non-Essential	Rv0095c	S	D52D	1
SAMN08892448	105060	G	A	Rv0095c	156	Non-Essential	Rv0095c	S	D52D	3
SAMEA3505308	105060	G	A	Rv0095c	156	Non-Essential	Rv0095c	S	D52D	2
SAMN07660236	105060	G	A	Rv0095c	156	Non-Essential	Rv0095c	S	D52D	1
SAMEA2297145	105060	G	A	Rv0095c	156	Non-Essential	Rv0095c	S	D52D	4
SAMEA3715475	105060	G	A	Rv0095c	156	Non-Essential	Rv0095c	S	D52D	4
TDR114S90L002	105060	G	A	Rv0095c	156	Non-Essential	Rv0095c	S	D52D	4
SAMN08912981	105060	G	A	Rv0095c	156	Non-Essential	Rv0095c	S	D52D	4
SAMN08612919	105060	G	A	Rv0095c	156	Non-Essential	Rv0095c	S	D52D	4
SAMN09102124	105060	G	A	Rv0095c	156	Non-Essential	Rv0095c	S	D52D	3
SAMN07659427	105060	G	A	Rv0095c	156	Non-Essential	Rv0095c	S	D52D	3
SAMEA104394705	105060	G	A	Rv0095c	156	Non-Essential	Rv0095c	S	D52D	4
SAMN03647147	105060	G	A	Rv0095c	156	Non-Essential	Rv0095c	S	D52D	1
SAMEA2534030	105060	G	A	Rv0095c	156	Non-Essential	Rv0095c	S	D52D	4
NLA009801164	105060	G	A	Rv0095c	156	Non-Essential	Rv0095c	S	D52D	4
SAMEA5626291	105060	G	A	Rv0095c	156	Non-Essential	Rv0095c	S	D52D	3
SAMEA2296967	105060	G	A	Rv0095c	156	Non-Essential	Rv0095c	S	D52D	4
SAMEA1117732	105060	G	A	Rv0095c	156	Non-Essential	Rv0095c	S	D52D	3
SAMEA1117785	105060	G	A	Rv0095c	156	Non-Essential	Rv0095c	S	D52D	3
SAMEA3449651	105060	G	A	Rv0095c	156	Non-Essential	Rv0095c	S	D52D	4
SAMEA2534632	105060	G	A	Rv0095c	156	Non-Essential	Rv0095c	S	D52D	4
SAMN04633281	105060	G	A	Rv0095c	156	Non-Essential	Rv0095c	S	D52D	4
SAMEA2661044	105060	G	A	Rv0095c	156	Non-Essential	Rv0095c	S	D52D	4
SAMEA1707170	105060	G	A	Rv0095c	156	Non-Essential	Rv0095c	S	D52D	4
SAMN09101582	105060	G	A	Rv0095c	156	Non-Essential	Rv0095c	S	D52D	3
SAMEA1707152	105060	G	A	Rv0095c	156	Non-Essential	Rv0095c	S	D52D	4
SAMEA5626258	105060	G	A	Rv0095c	156	Non-Essential	Rv0095c	S	D52D	3
SAMN08629405	105060	G	A	Rv0095c	156	Non-Essential	Rv0095c	S	D52D	1
SAMEA3671605	105060	G	A	Rv0095c	156	Non-Essential	Rv0095c	S	D52D	4
SAMN06091891	105060	G	A	Rv0095c	156	Non-Essential	Rv0095c	S	D52D	2
SAMN06092398	105060	G	A	Rv0095c	156	Non-Essential	Rv0095c	S	D52D	4
SAMN02360589	105060	G	A	Rv0095c	156	Non-Essential	Rv0095c	S	D52D	2
TDR203S155L002	105060	G	A	Rv0095c	156	Non-Essential	Rv0095c	S	D52D	4
SAMN08629523	105060	G	A	Rv0095c	156	Non-Essential	Rv0095c	S	D52D	3
SAMN08629219	105060	G	A	Rv0095c	156	Non-Essential	Rv0095c	S	D52D	3
SAMN09756297	105060	G	A	Rv0095c	156	Non-Essential	Rv0095c	S	D52D	4
SAMN07766287	105060	G	A	Rv0095c	156	Non-Essential	Rv0095c	S	D52D	3
SAMEA1119456	105060	G	A	Rv0095c	156	Non-Essential	Rv0095c	S	D52D	4
SAMN08637023	105060	G	A	Rv0095c	156	Non-Essential	Rv0095c	S	D52D	4
SAMEA1707400	105060	G	A	Rv0095c	156	Non-Essential	Rv0095c	S	D52D	4
SAMEA1119928	105060	G	A	Rv0095c	156	Non-Essential	Rv0095c	S	D52D	1
SAMN03648412	105060	G	A	Rv0095c	156	Non-Essential	Rv0095c	S	D52D	3
SAMEA4798657	105060	G	A	Rv0095c	156	Non-Essential	Rv0095c	S	D52D	4
SAMEA1118711	105060	G	A	Rv0095c	156	Non-Essential	Rv0095c	S	D52D	1
1852	105060	G	A	Rv0095c	156	Non-Essential	Rv0095c	S	D52D	4
SAMN07236440	105060	G	A	Rv0095c	156	Non-Essential	Rv0095c	S	D52D	2
IDR1400032735	105060	G	A	Rv0095c	156	Non-Essential	Rv0095c	S	D52D	2
SAMN08637018	105060	G	A	Rv0095c	156	Non-Essential	Rv0095c	S	D52D	4
SAMEA104394561	105060	G	A	Rv0095c	156	Non-Essential	Rv0095c	S	D52D	3
SAMEA1876294	105060	G	A	Rv0095c	156	Non-Essential	Rv0095c	S	D52D	1
SAMN07766013	105060	G	A	Rv0095c	156	Non-Essential	Rv0095c	S	D52D	3
SAMN03648062	105060	G	A	Rv0095c	156	Non-Essential	Rv0095c	S	D52D	2
SAMN09102367	105060	G	A	Rv0095c	156	Non-Essential	Rv0095c	S	D52D	6
SAMN06055865	105060	G	A	Rv0095c	156	Non-Essential	Rv0095c	S	D52D	2
SAMEA1885916	105060	G	A	Rv0095c	156	Non-Essential	Rv0095c	S	D52D	2
SAMEA1118293	105060	G	A	Rv0095c	156	Non-Essential	Rv0095c	S	D52D	3
SAMEA1877218	105060	G	A	Rv0095c	156	Non-Essential	Rv0095c	S	D52D	2
SAMEA1119008	105060	G	A	Rv0095c	156	Non-Essential	Rv0095c	S	D52D	3
SAMEA1406009	105060	G	A	Rv0095c	156	Non-Essential	Rv0095c	S	D52D	3
SAMN03648657	105060	G	A	Rv0095c	156	Non-Essential	Rv0095c	S	D52D	4
SAMEA4441480	105060	G	A	Rv0095c	156	Non-Essential	Rv0095c	S	D52D	4
SAMEA2682750	105060	G	A	Rv0095c	156	Non-Essential	Rv0095c	S	D52D	4
SAMEA1885991	105060	G	A	Rv0095c	156	Non-Essential	Rv0095c	S	D52D	1
SAMN03647161	105060	G	A	Rv0095c	156	Non-Essential	Rv0095c	S	D52D	3
SAMN03648476	105060	G	A	Rv0095c	156	Non-Essential	Rv0095c	S	D52D	3
SAMEA3432810	105060	G	A	Rv0095c	156	Non-Essential	Rv0095c	S	D52D	2
SAMN07658655	105060	G	A	Rv0095c	156	Non-Essential	Rv0095c	S	D52D	3
SAMN03647120	105060	G	A	Rv0095c	156	Non-Essential	Rv0095c	S	D52D	3
SAMEA1117931	105060	G	A	Rv0095c	156	Non-Essential	Rv0095c	S	D52D	1
SAMEA4798804	105060	G	A	Rv0095c	156	Non-Essential	Rv0095c	S	D52D	4
SAMN09101617	105060	G	A	Rv0095c	156	Non-Essential	Rv0095c	S	D52D	3
IDR1600004178	105060	G	A	Rv0095c	156	Non-Essential	Rv0095c	S	D52D	3
SAMN02414854	105060	G	A	Rv0095c	156	Non-Essential	Rv0095c	S	D52D	4
SAMEA1403576	105060	G	A	Rv0095c	156	Non-Essential	Rv0095c	S	D52D	4
SAMN03648463	105060	G	A	Rv0095c	156	Non-Essential	Rv0095c	S	D52D	3
SAMN09102267	105060	G	A	Rv0095c	156	Non-Essential	Rv0095c	S	D52D	3
SAMN04522005	105060	G	A	Rv0095c	156	Non-Essential	Rv0095c	S	D52D	4
SAMN09100400	105060	G	A	Rv0095c	156	Non-Essential	Rv0095c	S	D52D	3
SAMD00029426	105060	G	A	Rv0095c	156	Non-Essential	Rv0095c	S	D52D	2
SAMEA1904085	105060	G	A	Rv0095c	156	Non-Essential	Rv0095c	S	D52D	4
SAMD00117807	105060	G	A	Rv0095c	156	Non-Essential	Rv0095c	S	D52D	2
SAMEA5282425	105060	G	A	Rv0095c	156	Non-Essential	Rv0095c	S	D52D	2
SAMD00117825	105060	G	A	Rv0095c	156	Non-Essential	Rv0095c	S	D52D	2
SAMEA1117930	105060	G	A	Rv0095c	156	Non-Essential	Rv0095c	S	D52D	3
SAMEA1707208	105060	G	A	Rv0095c	156	Non-Essential	Rv0095c	S	D52D	4
SAMEA2683034	105060	G	A	Rv0095c	156	Non-Essential	Rv0095c	S	D52D	4
SAMEA3558770	105060	G	A	Rv0095c	156	Non-Essential	Rv0095c	S	D52D	4
SAMEA3209554	105060	G	A	Rv0095c	156	Non-Essential	Rv0095c	S	D52D	4
SAMEA3558776	105060	G	A	Rv0095c	156	Non-Essential	Rv0095c	S	D52D	4
TDR37combined	105060	G	A	Rv0095c	156	Non-Essential	Rv0095c	S	D52D	1
SAMN02599149	105060	G	A	Rv0095c	156	Non-Essential	Rv0095c	S	D52D	3
SAMEA1101452	105060	G	A	Rv0095c	156	Non-Essential	Rv0095c	S	D52D	3
SAMN04633343	105060	G	A	Rv0095c	156	Non-Essential	Rv0095c	S	D52D	4
SAMEA1118452	105060	G	A	Rv0095c	156	Non-Essential	Rv0095c	S	D52D	3
SAMEA3558242	105060	G	A	Rv0095c	156	Non-Essential	Rv0095c	S	D52D	4
SAMEA5366608	105060	G	A	Rv0095c	156	Non-Essential	Rv0095c	S	D52D	5
SAMEA3715485	105060	G	A	Rv0095c	156	Non-Essential	Rv0095c	S	D52D	4
SAMN02403509	105060	G	A	Rv0095c	156	Non-Essential	Rv0095c	S	D52D	4
SAMEA1119085	105060	G	A	Rv0095c	156	Non-Essential	Rv0095c	S	D52D	3
IDR1300033719	105060	G	A	Rv0095c	156	Non-Essential	Rv0095c	S	D52D	4
SAMEA1403933	105060	G	A	Rv0095c	156	Non-Essential	Rv0095c	S	D52D	4
SAMEA1102354	105060	G	A	Rv0095c	156	Non-Essential	Rv0095c	S	D52D	3
SAMN06279771	105060	G	A	Rv0095c	156	Non-Essential	Rv0095c	S	D52D	2
SAMN07766421	105060	G	A	Rv0095c	156	Non-Essential	Rv0095c	S	D52D	3
SAMEA5282526	105060	G	A	Rv0095c	156	Non-Essential	Rv0095c	S	D52D	4
SAMEA104362256	105060	G	A	Rv0095c	156	Non-Essential	Rv0095c	S	D52D	2
SAMEA1117908	105060	G	A	Rv0095c	156	Non-Essential	Rv0095c	S	D52D	3
SAMEA3374890	105060	G	A	Rv0095c	156	Non-Essential	Rv0095c	S	D52D	4
SAMEA2534833	105060	G	A	Rv0095c	156	Non-Essential	Rv0095c	S	D52D	4
SAMN02599080	105060	G	A	Rv0095c	156	Non-Essential	Rv0095c	S	D52D	1
SAMN08626089	105060	G	A	Rv0095c	156	Non-Essential	Rv0095c	S	D52D	2
SAMEA3558348	105060	G	A	Rv0095c	156	Non-Essential	Rv0095c	S	D52D	4
SAMEA1707527	105060	G	A	Rv0095c	156	Non-Essential	Rv0095c	S	D52D	4
SAMN07765948	105060	G	A	Rv0095c	156	Non-Essential	Rv0095c	S	D52D	3
TDR192S97L002	105060	G	A	Rv0095c	156	Non-Essential	Rv0095c	S	D52D	2
SAMEA1101295	105060	G	A	Rv0095c	156	Non-Essential	Rv0095c	S	D52D	4
SAMN08383184	105060	G	A	Rv0095c	156	Non-Essential	Rv0095c	S	D52D	4
SAMN03647888	105060	G	A	Rv0095c	156	Non-Essential	Rv0095c	S	D52D	3
IDR1500052791	105060	G	A	Rv0095c	156	Non-Essential	Rv0095c	S	D52D	4
SAMEA104357480	105060	G	A	Rv0095c	156	Non-Essential	Rv0095c	S	D52D	4
M0022470-0	105060	G	A	Rv0095c	156	Non-Essential	Rv0095c	S	D52D	4
SAMEA3324355	105060	G	A	Rv0095c	156	Non-Essential	Rv0095c	S	D52D	4
SAMEA1119130	105060	G	A	Rv0095c	156	Non-Essential	Rv0095c	S	D52D	3
SAMEA1119542	105060	G	A	Rv0095c	156	Non-Essential	Rv0095c	S	D52D	3
SAMD00029394	105060	G	A	Rv0095c	156	Non-Essential	Rv0095c	S	D52D	2
SAMEA3671560	105060	G	A	Rv0095c	156	Non-Essential	Rv0095c	S	D52D	4
SAMEA5626322	105060	G	A	Rv0095c	156	Non-Essential	Rv0095c	S	D52D	3
SAMEA1117670	105060	G	A	Rv0095c	156	Non-Essential	Rv0095c	S	D52D	1
SAMEA1403851	105060	G	A	Rv0095c	156	Non-Essential	Rv0095c	S	D52D	4
SAMN06210086	105060	G	A	Rv0095c	156	Non-Essential	Rv0095c	S	D52D	4
SAMEA961618	105060	G	A	Rv0095c	156	Non-Essential	Rv0095c	S	D52D	3
SAMEA1556546	105060	G	A	Rv0095c	156	Non-Essential	Rv0095c	S	D52D	4
SAMEA1707352	105060	G	A	Rv0095c	156	Non-Essential	Rv0095c	S	D52D	4
SAMN09100189	105060	G	A	Rv0095c	156	Non-Essential	Rv0095c	S	D52D	4
SAMN03647912	105060	G	A	Rv0095c	156	Non-Essential	Rv0095c	S	D52D	4
SAMN06092066	105060	G	A	Rv0095c	156	Non-Essential	Rv0095c	S	D52D	2
SAMEA3671538	105060	G	A	Rv0095c	156	Non-Essential	Rv0095c	S	D52D	4
SAMN08912768	105060	G	A	Rv0095c	156	Non-Essential	Rv0095c	S	D52D	3
SAMN09756052	105060	G	A	Rv0095c	156	Non-Essential	Rv0095c	S	D52D	4
SAMEA1101450	105060	G	A	Rv0095c	156	Non-Essential	Rv0095c	S	D52D	3
SAMN04633274	105060	G	A	Rv0095c	156	Non-Essential	Rv0095c	S	D52D	4
SAMN03648236	105060	G	A	Rv0095c	156	Non-Essential	Rv0095c	S	D52D	1
SAMEA1403719	105060	G	A	Rv0095c	156	Non-Essential	Rv0095c	S	D52D	4
SAMEA4888788	105060	G	A	Rv0095c	156	Non-Essential	Rv0095c	S	D52D	4
SAMN03647131	105060	G	A	Rv0095c	156	Non-Essential	Rv0095c	S	D52D	1
SAMEA3401931	105060	G	A	Rv0095c	156	Non-Essential	Rv0095c	S	D52D	4
SAMD00117889	105060	G	A	Rv0095c	156	Non-Essential	Rv0095c	S	D52D	2
SAMEA4798753	105060	G	A	Rv0095c	156	Non-Essential	Rv0095c	S	D52D	4
SAMN02414983	105060	G	A	Rv0095c	156	Non-Essential	Rv0095c	S	D52D	4
SAMN07999089	105060	G	A	Rv0095c	156	Non-Essential	Rv0095c	S	D52D	2
SAMEA5542143	105060	G	A	Rv0095c	156	Non-Essential	Rv0095c	S	D52D	4
SAMN08612768	105060	G	A	Rv0095c	156	Non-Essential	Rv0095c	S	D52D	4
SAMEA1406021	105060	G	A	Rv0095c	156	Non-Essential	Rv0095c	S	D52D	3
SAMN03648292	105060	G	A	Rv0095c	156	Non-Essential	Rv0095c	S	D52D	3
SAMN07658820	105060	G	A	Rv0095c	156	Non-Essential	Rv0095c	S	D52D	3
SAMEA2081437	105060	G	A	Rv0095c	156	Non-Essential	Rv0095c	S	D52D	3
SAMEA104172508	105060	G	A	Rv0095c	156	Non-Essential	Rv0095c	S	D52D	4
SAMN03647209	105060	G	A	Rv0095c	156	Non-Essential	Rv0095c	S	D52D	3
SAMEA5542163	105060	G	A	Rv0095c	156	Non-Essential	Rv0095c	S	D52D	4
SAMEA1119898	105060	G	A	Rv0095c	156	Non-Essential	Rv0095c	S	D52D	3
SAMN08214903	105060	G	A	Rv0095c	156	Non-Essential	Rv0095c	S	D52D	3
SAMEA1118303	105060	G	A	Rv0095c	156	Non-Essential	Rv0095c	S	D52D	1
SAMEA1118446	105060	G	A	Rv0095c	156	Non-Essential	Rv0095c	S	D52D	3
SAMEA1904705	105060	G	A	Rv0095c	156	Non-Essential	Rv0095c	S	D52D	3
02R1940	105060	G	A	Rv0095c	156	Non-Essential	Rv0095c	S	D52D	4
TDR75S173L002	105060	G	A	Rv0095c	156	Non-Essential	Rv0095c	S	D52D	4
SAMEA3671296	105060	G	A	Rv0095c	156	Non-Essential	Rv0095c	S	D52D	4
SAMEA2534560	105060	G	A	Rv0095c	156	Non-Essential	Rv0095c	S	D52D	4
SAMN13169723	105060	G	A	Rv0095c	156	Non-Essential	Rv0095c	S	D52D	4
SAMEA1530869	105060	G	A	Rv0095c	156	Non-Essential	Rv0095c	S	D52D	4
SAMN12551372	105060	G	A	Rv0095c	156	Non-Essential	Rv0095c	S	D52D	2
SAMEA2533832	105060	G	A	Rv0095c	156	Non-Essential	Rv0095c	S	D52D	4
SAMEA1119820	105060	G	A	Rv0095c	156	Non-Essential	Rv0095c	S	D52D	4
SAMN08383220	105060	G	A	Rv0095c	156	Non-Essential	Rv0095c	S	D52D	4
SAMEA104684920	105060	G	A	Rv0095c	156	Non-Essential	Rv0095c	S	D52D	3
SAMEA1406152	105060	G	A	Rv0095c	156	Non-Essential	Rv0095c	S	D52D	1
SAMEA1102338	105060	G	A	Rv0095c	156	Non-Essential	Rv0095c	S	D52D	3
SAMN06579006	105060	G	A	Rv0095c	156	Non-Essential	Rv0095c	S	D52D	3
SAMN03648348	105060	G	A	Rv0095c	156	Non-Essential	Rv0095c	S	D52D	4
SAMEA4798844	105060	G	A	Rv0095c	156	Non-Essential	Rv0095c	S	D52D	4
SAMN08629562	105060	G	A	Rv0095c	156	Non-Essential	Rv0095c	S	D52D	1
SAMEA2710966	105060	G	A	Rv0095c	156	Non-Essential	Rv0095c	S	D52D	1
SAMEA1886038	105060	G	A	Rv0095c	156	Non-Essential	Rv0095c	S	D52D	3
SAMEA2297021	105060	G	A	Rv0095c	156	Non-Essential	Rv0095c	S	D52D	4
TDR199S150L002	105060	G	A	Rv0095c	156	Non-Essential	Rv0095c	S	D52D	2
SAMEA1119590	105060	G	A	Rv0095c	156	Non-Essential	Rv0095c	S	D52D	3
SAMEA5626275	105060	G	A	Rv0095c	156	Non-Essential	Rv0095c	S	D52D	3
SAMN08637049	105060	G	A	Rv0095c	156	Non-Essential	Rv0095c	S	D52D	4
SAMN03648086	105060	G	A	Rv0095c	156	Non-Essential	Rv0095c	S	D52D	4
SAMEA2533827	105060	G	A	Rv0095c	156	Non-Essential	Rv0095c	S	D52D	4
SAMEA1117842	105060	G	A	Rv0095c	156	Non-Essential	Rv0095c	S	D52D	3
SAMEA1102794	105060	G	A	Rv0095c	156	Non-Essential	Rv0095c	S	D52D	3
SAMEA1404028	105060	G	A	Rv0095c	156	Non-Essential	Rv0095c	S	D52D	4
SAMEA2535324	105060	G	A	Rv0095c	156	Non-Essential	Rv0095c	S	D52D	4
SAMEA1929770	105060	G	A	Rv0095c	156	Non-Essential	Rv0095c	S	D52D	1
SAMN08708664	105060	G	A	Rv0095c	156	Non-Essential	Rv0095c	S	D52D	4
SAMN02381016	105060	G	A	Rv0095c	156	Non-Essential	Rv0095c	S	D52D	4
SAMEA3558758	105060	G	A	Rv0095c	156	Non-Essential	Rv0095c	S	D52D	4
SAMEA1902640	105060	G	A	Rv0095c	156	Non-Essential	Rv0095c	S	D52D	4
SAMN08613005	105060	G	A	Rv0095c	156	Non-Essential	Rv0095c	S	D52D	4
SAMN09102508	105060	G	A	Rv0095c	156	Non-Essential	Rv0095c	S	D52D	3
TDR82S179L002	105060	G	A	Rv0095c	156	Non-Essential	Rv0095c	S	D52D	2
SAMEA1119670	105060	G	A	Rv0095c	156	Non-Essential	Rv0095c	S	D52D	4
SAMEA3558143	105060	G	A	Rv0095c	156	Non-Essential	Rv0095c	S	D52D	1
SAMEA3671412	105060	G	A	Rv0095c	156	Non-Essential	Rv0095c	S	D52D	4
SAMEA5626267	105060	G	A	Rv0095c	156	Non-Essential	Rv0095c	S	D52D	1
SAMN06055509	105060	G	A	Rv0095c	156	Non-Essential	Rv0095c	S	D52D	2
SAMEA3444043	105060	G	A	Rv0095c	156	Non-Essential	Rv0095c	S	D52D	3
SAMEA3558388	105060	G	A	Rv0095c	156	Non-Essential	Rv0095c	S	D52D	4
SAMEA3671563	105060	G	A	Rv0095c	156	Non-Essential	Rv0095c	S	D52D	4
SAMEA1101816	105060	G	A	Rv0095c	156	Non-Essential	Rv0095c	S	D52D	3
SAMEA1707925	105060	G	A	Rv0095c	156	Non-Essential	Rv0095c	S	D52D	3
SAMN03648207	105060	G	A	Rv0095c	156	Non-Essential	Rv0095c	S	D52D	3
1479146369267T183815lib5043nextseqn0035151bp	105060	G	A	Rv0095c	156	Non-Essential	Rv0095c	S	D52D	2
SAMEA3436333	105060	G	A	Rv0095c	156	Non-Essential	Rv0095c	S	D52D	3
SAMN03647476	105060	G	A	Rv0095c	156	Non-Essential	Rv0095c	S	D52D	3
SAMN08626400	105060	G	A	Rv0095c	156	Non-Essential	Rv0095c	S	D52D	4
IDR1600044955	105060	G	A	Rv0095c	156	Non-Essential	Rv0095c	S	D52D	2
SAMN07766139	105060	G	A	Rv0095c	156	Non-Essential	Rv0095c	S	D52D	3
SAMN09100502	105060	G	A	Rv0095c	156	Non-Essential	Rv0095c	S	D52D	3
SAMEA104362305	105060	G	A	Rv0095c	156	Non-Essential	Rv0095c	S	D52D	4
SAMD00117871	105060	G	A	Rv0095c	156	Non-Essential	Rv0095c	S	D52D	2
SAMN08612776	105060	G	A	Rv0095c	156	Non-Essential	Rv0095c	S	D52D	2
SAMEA3558391	105060	G	A	Rv0095c	156	Non-Essential	Rv0095c	S	D52D	4
SAMN03648372	105060	G	A	Rv0095c	156	Non-Essential	Rv0095c	S	D52D	4
SAMEA4473387	105060	G	A	Rv0095c	156	Non-Essential	Rv0095c	S	D52D	4
1479146369267T185015lib5055nextseqn0035151bp	105060	G	A	Rv0095c	156	Non-Essential	Rv0095c	S	D52D	2
SAMN08612967	105060	G	A	Rv0095c	156	Non-Essential	Rv0095c	S	D52D	4
SAMN03648093	105060	G	A	Rv0095c	156	Non-Essential	Rv0095c	S	D52D	1
SAMEA4798683	105060	G	A	Rv0095c	156	Non-Essential	Rv0095c	S	D52D	4
SAMEA1119727	105060	G	A	Rv0095c	156	Non-Essential	Rv0095c	S	D52D	3
SAMEA1119135	105060	G	A	Rv0095c	156	Non-Essential	Rv0095c	S	D52D	3
IDR1600049307	105060	G	A	Rv0095c	156	Non-Essential	Rv0095c	S	D52D	1
SAMN08626345	105060	G	A	Rv0095c	156	Non-Essential	Rv0095c	S	D52D	2
SAMEA1406134	105060	G	A	Rv0095c	156	Non-Essential	Rv0095c	S	D52D	3
SAMEA5626262	105060	G	A	Rv0095c	156	Non-Essential	Rv0095c	S	D52D	3
SAMN02231171	105060	G	A	Rv0095c	156	Non-Essential	Rv0095c	S	D52D	4
SAMEA4473383	105060	G	A	Rv0095c	156	Non-Essential	Rv0095c	S	D52D	4
SAMN08215089	105060	G	A	Rv0095c	156	Non-Essential	Rv0095c	S	D52D	2
SAMN08629277	105060	G	A	Rv0095c	156	Non-Essential	Rv0095c	S	D52D	1
SAMN06092160	105060	G	A	Rv0095c	156	Non-Essential	Rv0095c	S	D52D	2
SAMN08892535	105060	G	A	Rv0095c	156	Non-Essential	Rv0095c	S	D52D	3
SAMEA5076129	105060	G	A	Rv0095c	156	Non-Essential	Rv0095c	S	D52D	4
SAMN04633356	105060	G	A	Rv0095c	156	Non-Essential	Rv0095c	S	D52D	4
SAMEA1101433	105060	G	A	Rv0095c	156	Non-Essential	Rv0095c	S	D52D	4
SAMN07766255	105060	G	A	Rv0095c	156	Non-Essential	Rv0095c	S	D52D	3
SAMN06092107	105060	G	A	Rv0095c	156	Non-Essential	Rv0095c	S	D52D	2
SAMEA2534524	105060	G	A	Rv0095c	156	Non-Essential	Rv0095c	S	D52D	3
SAMEA3671521	105060	G	A	Rv0095c	156	Non-Essential	Rv0095c	S	D52D	4
SAMEA1101786	105060	G	A	Rv0095c	156	Non-Essential	Rv0095c	S	D52D	3
SAMD00117914	105060	G	A	Rv0095c	156	Non-Essential	Rv0095c	S	D52D	2
SAMN08383180	105060	G	A	Rv0095c	156	Non-Essential	Rv0095c	S	D52D	4
SAMN08629251	105060	G	A	Rv0095c	156	Non-Essential	Rv0095c	S	D52D	1
SAMN03648058	105060	G	A	Rv0095c	156	Non-Essential	Rv0095c	S	D52D	3
SAMEA1485293	105060	G	A	Rv0095c	156	Non-Essential	Rv0095c	S	D52D	4
SAMEA5626271	105060	G	A	Rv0095c	156	Non-Essential	Rv0095c	S	D52D	3
SAMEA4798697	105060	G	A	Rv0095c	156	Non-Essential	Rv0095c	S	D52D	4
SAMN04633286	105060	G	A	Rv0095c	156	Non-Essential	Rv0095c	S	D52D	4
IDR1500062350	105060	G	A	Rv0095c	156	Non-Essential	Rv0095c	S	D52D	4
SAMEA2061812	105060	G	A	Rv0095c	156	Non-Essential	Rv0095c	S	D52D	4
SAMEA1886045	105060	G	A	Rv0095c	156	Non-Essential	Rv0095c	S	D52D	3
SAMEA2783026	105060	G	A	Rv0095c	156	Non-Essential	Rv0095c	S	D52D	4
SAMEA1118845	105060	G	A	Rv0095c	156	Non-Essential	Rv0095c	S	D52D	3
SAMEA3671389	105060	G	A	Rv0095c	156	Non-Essential	Rv0095c	S	D52D	4
SAMEA104326164	105060	G	A	Rv0095c	156	Non-Essential	Rv0095c	S	D52D	4
SAMN08709304	105060	G	A	Rv0095c	156	Non-Essential	Rv0095c	S	D52D	4
SAMEA4798921	105060	G	A	Rv0095c	156	Non-Essential	Rv0095c	S	D52D	4
SAMEA3446550	105060	G	A	Rv0095c	156	Non-Essential	Rv0095c	S	D52D	4
SAMEA104685023	105060	G	A	Rv0095c	156	Non-Essential	Rv0095c	S	D52D	4
SAMEA1397450	105060	G	A	Rv0095c	156	Non-Essential	Rv0095c	S	D52D	3
SAMEA104685022	105060	G	A	Rv0095c	156	Non-Essential	Rv0095c	S	D52D	1
SAMEA3558504	105060	G	A	Rv0095c	156	Non-Essential	Rv0095c	S	D52D	4
SAMN09099981	105060	G	A	Rv0095c	156	Non-Essential	Rv0095c	S	D52D	3
SAMEA3447611	105060	G	A	Rv0095c	156	Non-Essential	Rv0095c	S	D52D	4
SAMN02053770	105060	G	A	Rv0095c	156	Non-Essential	Rv0095c	S	D52D	4
SAMEA1465982	105060	G	A	Rv0095c	156	Non-Essential	Rv0095c	S	D52D	4
SAMEA3558420	105063	G	A	Rv0095c	153	Non-Essential	Rv0095c	S	F51F	4
SAMN03648673	105063	G	A	Rv0095c	153	Non-Essential	Rv0095c	S	F51F	4
SAMEA5228948	105063	G	A	Rv0095c	153	Non-Essential	Rv0095c	S	F51F	4
SAMN06279772	105063	G	A	Rv0095c	153	Non-Essential	Rv0095c	S	F51F	2
SAMN03649043	105063	G	A	Rv0095c	153	Non-Essential	Rv0095c	S	F51F	4
SAMN08795339	105063	G	A	Rv0095c	153	Non-Essential	Rv0095c	S	F51F	4
SAMEA1119324	105063	G	A	Rv0095c	153	Non-Essential	Rv0095c	S	F51F	3
SAMEA2534278	105063	G	A	Rv0095c	153	Non-Essential	Rv0095c	S	F51F	4
SAMEA1885956	105063	G	A	Rv0095c	153	Non-Essential	Rv0095c	S	F51F	2
SAMN08708714	105063	G	A	Rv0095c	153	Non-Essential	Rv0095c	S	F51F	4
SAMN06055779	105063	G	A	Rv0095c	153	Non-Essential	Rv0095c	S	F51F	2
SAMEA1119834	105063	G	A	Rv0095c	153	Non-Essential	Rv0095c	S	F51F	3
SAMEA3444495	105063	G	A	Rv0095c	153	Non-Essential	Rv0095c	S	F51F	4
SAMD00117848	105063	G	A	Rv0095c	153	Non-Essential	Rv0095c	S	F51F	2
SAMN02584639	105063	G	A	Rv0095c	153	Non-Essential	Rv0095c	S	F51F	4
SAMEA104394539	105063	G	A	Rv0095c	153	Non-Essential	Rv0095c	S	F51F	4
SAMN07766378	105063	G	A	Rv0095c	153	Non-Essential	Rv0095c	S	F51F	2
SAMN10462625	105063	G	A	Rv0095c	153	Non-Essential	Rv0095c	S	F51F	2
SAMEA3671617	105063	G	A	Rv0095c	153	Non-Essential	Rv0095c	S	F51F	4
SAMEA1118623	105063	G	A	Rv0095c	153	Non-Essential	Rv0095c	S	F51F	3
SAMEA1102254	105063	G	A	Rv0095c	153	Non-Essential	Rv0095c	S	F51F	3
SAMEA104684999	105063	G	A	Rv0095c	153	Non-Essential	Rv0095c	S	F51F	4
SAMN02380998	105063	G	A	Rv0095c	153	Non-Essential	Rv0095c	S	F51F	4
SAMEA3558451	105063	G	A	Rv0095c	153	Non-Essential	Rv0095c	S	F51F	2
SAMEA4798789	105063	G	A	Rv0095c	153	Non-Essential	Rv0095c	S	F51F	4
SAMN03647916	105063	G	A	Rv0095c	153	Non-Essential	Rv0095c	S	F51F	4
SAMN03648046	105063	G	A	Rv0095c	153	Non-Essential	Rv0095c	S	F51F	2
SAMN02584604	105063	G	A	Rv0095c	153	Non-Essential	Rv0095c	S	F51F	4
SAMN06055862	105063	G	A	Rv0095c	153	Non-Essential	Rv0095c	S	F51F	2
SAMEA2535322	105063	G	A	Rv0095c	153	Non-Essential	Rv0095c	S	F51F	4
SAMEA3444514	105063	G	A	Rv0095c	153	Non-Essential	Rv0095c	S	F51F	3
SAMEA3558731	105063	G	A	Rv0095c	153	Non-Essential	Rv0095c	S	F51F	4
SAMEA3512721	105063	G	A	Rv0095c	153	Non-Essential	Rv0095c	S	F51F	4
SAMEA3671589	105063	G	A	Rv0095c	153	Non-Essential	Rv0095c	S	F51F	4
SAMEA3558754	105063	G	A	Rv0095c	153	Non-Essential	Rv0095c	S	F51F	4
SAMEA1556846	105063	G	A	Rv0095c	153	Non-Essential	Rv0095c	S	F51F	4
TDR215S192L002	105063	G	A	Rv0095c	153	Non-Essential	Rv0095c	S	F51F	4
SAMN13169459	105063	G	A	Rv0095c	153	Non-Essential	Rv0095c	S	F51F	4
SAMN08215417	105063	G	A	Rv0095c	153	Non-Essential	Rv0095c	S	F51F	3
TDR105S128L002	105063	G	A	Rv0095c	153	Non-Essential	Rv0095c	S	F51F	2
SAMN03647194	105063	G	A	Rv0095c	153	Non-Essential	Rv0095c	S	F51F	3
SAMN08708525	105063	G	A	Rv0095c	153	Non-Essential	Rv0095c	S	F51F	4
SAMD00117765	105063	G	A	Rv0095c	153	Non-Essential	Rv0095c	S	F51F	2
SAMEA1117968	105063	G	A	Rv0095c	153	Non-Essential	Rv0095c	S	F51F	3
SAMN09100127	105063	G	A	Rv0095c	153	Non-Essential	Rv0095c	S	F51F	3
SAMN06092508	105063	G	A	Rv0095c	153	Non-Essential	Rv0095c	S	F51F	2
SAMEA5282477	105063	G	A	Rv0095c	153	Non-Essential	Rv0095c	S	F51F	2
SAMN07658478	105063	G	A	Rv0095c	153	Non-Essential	Rv0095c	S	F51F	3
SAMEA2072272	105063	G	A	Rv0095c	153	Non-Essential	Rv0095c	S	F51F	4
SAMEA1556688	105063	G	A	Rv0095c	153	Non-Essential	Rv0095c	S	F51F	4
SAMN06279781	105063	G	A	Rv0095c	153	Non-Essential	Rv0095c	S	F51F	2
SAMN06055445	105063	G	A	Rv0095c	153	Non-Essential	Rv0095c	S	F51F	2
SAMEA3671242	105063	G	A	Rv0095c	153	Non-Essential	Rv0095c	S	F51F	4
SAMEA2591384	105063	G	A	Rv0095c	153	Non-Essential	Rv0095c	S	F51F	3
SAMEA4798659	105063	G	A	Rv0095c	153	Non-Essential	Rv0095c	S	F51F	4
SAMEA1404003	105063	G	A	Rv0095c	153	Non-Essential	Rv0095c	S	F51F	4
SAMEA3374903	105063	G	A	Rv0095c	153	Non-Essential	Rv0095c	S	F51F	4
SAMN06091842	105063	G	A	Rv0095c	153	Non-Essential	Rv0095c	S	F51F	2
SAMEA5282457	105063	G	A	Rv0095c	153	Non-Essential	Rv0095c	S	F51F	4
SAMN03648010	105063	G	A	Rv0095c	153	Non-Essential	Rv0095c	S	F51F	3
SAMN08379939	105063	G	A	Rv0095c	153	Non-Essential	Rv0095c	S	F51F	4
SAMN08215426	105063	G	A	Rv0095c	153	Non-Essential	Rv0095c	S	F51F	3
SAMEA1119619	105063	G	A	Rv0095c	153	Non-Essential	Rv0095c	S	F51F	3
SAMEA1707277	105063	G	A	Rv0095c	153	Non-Essential	Rv0095c	S	F51F	4
SAMEA3421182	105063	G	A	Rv0095c	153	Non-Essential	Rv0095c	S	F51F	3
SAMEA1465959	105063	G	A	Rv0095c	153	Non-Essential	Rv0095c	S	F51F	4
SAMEA95533918	105063	G	A	Rv0095c	153	Non-Essential	Rv0095c	S	F51F	4
SAMD00117915	105063	G	A	Rv0095c	153	Non-Essential	Rv0095c	S	F51F	2
SAMN07766015	105063	G	A	Rv0095c	153	Non-Essential	Rv0095c	S	F51F	1
SAMN08629348	105063	G	A	Rv0095c	153	Non-Essential	Rv0095c	S	F51F	1
SAMEA1119106	105063	G	A	Rv0095c	153	Non-Essential	Rv0095c	S	F51F	3
SAMEA1118229	105063	G	A	Rv0095c	153	Non-Essential	Rv0095c	S	F51F	3
SAMEA2061808	105063	G	A	Rv0095c	153	Non-Essential	Rv0095c	S	F51F	4
SAMEA1101737	105063	G	A	Rv0095c	153	Non-Essential	Rv0095c	S	F51F	3
SAMN06210009	105063	G	A	Rv0095c	153	Non-Essential	Rv0095c	S	F51F	4
SAMN07658457	105063	G	A	Rv0095c	153	Non-Essential	Rv0095c	S	F51F	1
SAMN06055831	105063	G	A	Rv0095c	153	Non-Essential	Rv0095c	S	F51F	2
SAMD00117934	105063	G	A	Rv0095c	153	Non-Essential	Rv0095c	S	F51F	2
SAMN03647099	105063	G	A	Rv0095c	153	Non-Essential	Rv0095c	S	F51F	3
SAMN08708505	105063	G	A	Rv0095c	153	Non-Essential	Rv0095c	S	F51F	4
SAMEA3139831	105063	G	A	Rv0095c	153	Non-Essential	Rv0095c	S	F51F	1
SAMEA5662677	105063	G	A	Rv0095c	153	Non-Essential	Rv0095c	S	F51F	4
SAMEA2533801	105063	G	A	Rv0095c	153	Non-Essential	Rv0095c	S	F51F	4
SAMEA4798634	105063	G	A	Rv0095c	153	Non-Essential	Rv0095c	S	F51F	4
SAMEA2297001	105063	G	A	Rv0095c	153	Non-Essential	Rv0095c	S	F51F	1
SAMEA1556713	105063	G	A	Rv0095c	153	Non-Essential	Rv0095c	S	F51F	4
SAMEA5626311	105063	G	A	Rv0095c	153	Non-Essential	Rv0095c	S	F51F	3
SAMEA1406135	105063	G	A	Rv0095c	153	Non-Essential	Rv0095c	S	F51F	4
SAMN09100245	105063	G	A	Rv0095c	153	Non-Essential	Rv0095c	S	F51F	4
SAMEA5282463	105063	G	A	Rv0095c	153	Non-Essential	Rv0095c	S	F51F	2
IDR1600031131	105063	G	A	Rv0095c	153	Non-Essential	Rv0095c	S	F51F	2
02R1203	105063	G	A	Rv0095c	153	Non-Essential	Rv0095c	S	F51F	4
SAMN08851393	105063	G	A	Rv0095c	153	Non-Essential	Rv0095c	S	F51F	2
SAMN08892422	105063	G	A	Rv0095c	153	Non-Essential	Rv0095c	S	F51F	3
SAMEA4798919	105063	G	A	Rv0095c	153	Non-Essential	Rv0095c	S	F51F	4
SAMEA3451223	105063	G	A	Rv0095c	153	Non-Essential	Rv0095c	S	F51F	4
SAMN08709196	105063	G	A	Rv0095c	153	Non-Essential	Rv0095c	S	F51F	4
SAMN03647408	105063	G	A	Rv0095c	153	Non-Essential	Rv0095c	S	F51F	3
1479153938227T1379914lib3430nextseqn0004151bp	105063	G	A	Rv0095c	153	Non-Essential	Rv0095c	S	F51F	4
SAMN09099636	105063	G	A	Rv0095c	153	Non-Essential	Rv0095c	S	F51F	3
SAMN03648011	105063	G	A	Rv0095c	153	Non-Essential	Rv0095c	S	F51F	3
SAMEA1406139	105063	G	A	Rv0095c	153	Non-Essential	Rv0095c	S	F51F	1
SAMEA3430668	105063	G	A	Rv0095c	153	Non-Essential	Rv0095c	S	F51F	4
SAMN08912949	105063	G	A	Rv0095c	153	Non-Essential	Rv0095c	S	F51F	4
SAMN07236366	105063	G	A	Rv0095c	153	Non-Essential	Rv0095c	S	F51F	2
SAMEA4473384	105063	G	A	Rv0095c	153	Non-Essential	Rv0095c	S	F51F	4
SAMN08732593	105063	G	A	Rv0095c	153	Non-Essential	Rv0095c	S	F51F	2
1479151773189T1378114lib3412nextseqn0004151bp	105063	G	A	Rv0095c	153	Non-Essential	Rv0095c	S	F51F	4
SAMEA4798857	105063	G	A	Rv0095c	153	Non-Essential	Rv0095c	S	F51F	4
SAMN13169455	105063	G	A	Rv0095c	153	Non-Essential	Rv0095c	S	F51F	4
SAMEA5282367	105063	G	A	Rv0095c	153	Non-Essential	Rv0095c	S	F51F	1
SAMEA1101788	105063	G	A	Rv0095c	153	Non-Essential	Rv0095c	S	F51F	3
SAMN09100205	105063	G	A	Rv0095c	153	Non-Essential	Rv0095c	S	F51F	1
SAMEA5329276	105063	G	A	Rv0095c	153	Non-Essential	Rv0095c	S	F51F	2
SAMEA3139819	105063	G	A	Rv0095c	153	Non-Essential	Rv0095c	S	F51F	3
SAMEA4041372	105063	G	A	Rv0095c	153	Non-Essential	Rv0095c	S	F51F	4
SAMEA1102256	105063	G	A	Rv0095c	153	Non-Essential	Rv0095c	S	F51F	3
SAMN04633329	105063	G	A	Rv0095c	153	Non-Essential	Rv0095c	S	F51F	4
SAMN08214914	105063	G	A	Rv0095c	153	Non-Essential	Rv0095c	S	F51F	4
SAMEA1119900	105063	G	A	Rv0095c	153	Non-Essential	Rv0095c	S	F51F	1
SAMEA1118008	105063	G	A	Rv0095c	153	Non-Essential	Rv0095c	S	F51F	3
SAMEA2072269	105063	G	A	Rv0095c	153	Non-Essential	Rv0095c	S	F51F	4
SAMN03647623	105063	G	A	Rv0095c	153	Non-Essential	Rv0095c	S	F51F	3
SAMEA3446428	105063	G	A	Rv0095c	153	Non-Essential	Rv0095c	S	F51F	3
SAMN09100467	105063	G	A	Rv0095c	153	Non-Essential	Rv0095c	S	F51F	4
SAMN07766476	105063	G	A	Rv0095c	153	Non-Essential	Rv0095c	S	F51F	2
SAMEA3402873	105063	G	A	Rv0095c	153	Non-Essential	Rv0095c	S	F51F	4
SAMEA2710949	105063	G	A	Rv0095c	153	Non-Essential	Rv0095c	S	F51F	4
SAMEA1118761	105063	G	A	Rv0095c	153	Non-Essential	Rv0095c	S	F51F	3
SAMN06578970	105063	G	A	Rv0095c	153	Non-Essential	Rv0095c	S	F51F	3
SAMEA3448208	105063	G	A	Rv0095c	153	Non-Essential	Rv0095c	S	F51F	3
SAMEA1397493	105063	G	A	Rv0095c	153	Non-Essential	Rv0095c	S	F51F	3
SAMEA2783521	105063	G	A	Rv0095c	153	Non-Essential	Rv0095c	S	F51F	4
SAMN03647404	105063	G	A	Rv0095c	153	Non-Essential	Rv0095c	S	F51F	1
SAMEA1101746	105063	G	A	Rv0095c	153	Non-Essential	Rv0095c	S	F51F	1
SAMEA3446743	105063	G	A	Rv0095c	153	Non-Essential	Rv0095c	S	F51F	4
SAMEA1904657	105063	G	A	Rv0095c	153	Non-Essential	Rv0095c	S	F51F	3
Peru4952	105063	G	A	Rv0095c	153	Non-Essential	Rv0095c	S	F51F	4
SAMN13169733	105063	G	A	Rv0095c	153	Non-Essential	Rv0095c	S	F51F	4
SAMN04396841	105063	G	A	Rv0095c	153	Non-Essential	Rv0095c	S	F51F	3
SAMN06279780	105063	G	A	Rv0095c	153	Non-Essential	Rv0095c	S	F51F	2
SAMEA4888761	105063	G	A	Rv0095c	153	Non-Essential	Rv0095c	S	F51F	4
SAMN07658508	105063	G	A	Rv0095c	153	Non-Essential	Rv0095c	S	F51F	3
TDR57S91L002	105063	G	A	Rv0095c	153	Non-Essential	Rv0095c	S	F51F	4
SAMEA4041347	105063	G	A	Rv0095c	153	Non-Essential	Rv0095c	S	F51F	4
SAMEA2783261	105063	G	A	Rv0095c	153	Non-Essential	Rv0095c	S	F51F	4
SAMEA2533545	105063	G	A	Rv0095c	153	Non-Essential	Rv0095c	S	F51F	3
SAMN08795067	105063	G	A	Rv0095c	153	Non-Essential	Rv0095c	S	F51F	4
SAMN07658161	105063	G	A	Rv0095c	153	Non-Essential	Rv0095c	S	F51F	3
[truncated: 9,974 more rows]
